# Supplementary material
Source: publisher figshare collection journal article supplement (https://gsajournals.figshare.com/articles/dataset/_/26424277)
Supplement: Supplementary file 1 [file 1]

## Sheet: DESeq2_results_extended_with_ba
Table S3 : All genes DESeq2 results basemean
Table columns: GeneID; BaseMean_MIT; BaseMean_MEI; log2-Fold-Change; Pvalue (t-test, Red); Padjust
GeneID	basemitMITOSIS	basemitMEIOSIS	log2FC	Pvalue	Padj
128up	2057.9481215612163	1765.33113683288	-0.220860275536639	0.41613352012306	0.748070514589401
14-3-3epsilon	15663.223836127632	13466.830543475	-0.217903837746392	0.37467841451442	0.714494678221373
14-3-3zeta	20709.156147306636	20560.28092770505	-0.0104227466328824	0.969506190461159	0.99188274823945
140up	278.403704632778	280.8999888836845	0.0117043862034186	0.968474938359354	0.991752817465634
18SrRNA:CR41548	0.0	0.0	NA	NA	NA
18SrRNA:CR45838	0.0	0.0	NA	NA	NA
18SrRNA:CR45841	0.0	0.0	NA	NA	NA
18w	5786.582389998187	2201.721668525895	-1.39391649359166	0.000387171214709862	0.00922698588420301
26-29-p	5678.5576715890675	8817.063215626851	0.634819915434264	0.00697861296752249	0.0766180575669682
28SrRNA:CR45837	0.0	0.0	NA	NA	NA
28SrRNA:CR45844	0.0	0.0	NA	NA	NA
2SrRNA:CR45836	0.0	0.0	NA	NA	NA
2SrRNA:CR45840	0.0	0.0	NA	NA	NA
2SrRNA:CR45843	0.0	0.0	NA	NA	NA
2SrRNA:CR45864	0.0	0.0	NA	NA	NA
2mit	0.0	1.524153624454915	2.62484056104789	0.548735237959236	NA
312	255.89149076916135	270.3850515105185	0.0796303842527759	0.820299609145476	0.946484161873656
4E-T	3425.248998107693	4147.672244926085	0.275770693716318	0.26055582055329	0.616764952194816
4EHP	1426.3129213122631	1621.961086877765	0.185604071032084	0.461544176482015	0.777610590870415
5-HT1A	0.7038577904508333	1.5432486106499106	1.04074036521125	0.771174085521914	NA
5-HT1B	0.0	0.0	NA	NA	NA
5-HT2A	42.224354221992066	93.9131597406786	1.15558136133786	0.0123378424247046	0.111352795984921
5-HT2B	4.336119549825534	2.13381507423688	-1.01712384487608	0.768703514969349	NA
5-HT7	2.1115733713525033	0.0	-4.21060444172556	0.344829010575961	NA
5.8SrRNA:CR40454	110.32297480046084	0.3239257110859805	-8.4469998790438	8.64021626944822e-06	0.000446828784374515
5.8SrRNA:CR45839	0.0	0.0	NA	NA	NA
5.8SrRNA:CR45842	0.0	0.0	NA	NA	NA
5.8SrRNA:CR45852	0.0	0.0	NA	NA	NA
5PtaseI	482.69000487327634	641.7495872301055	0.409108473089462	0.266506891155978	0.622111161126572
5SrRNA:CR33353	0.0	0.0	NA	NA	NA
5SrRNA:CR33354	0.0	0.0	NA	NA	NA
5SrRNA:CR33355	0.0	0.0	NA	NA	NA
5SrRNA:CR33357	0.0	0.0	NA	NA	NA
5SrRNA:CR33358	0.0	0.0	NA	NA	NA
5SrRNA:CR33359	0.0	0.0	NA	NA	NA
5SrRNA:CR33360	0.0	0.0	NA	NA	NA
5SrRNA:CR33361	0.0	0.0	NA	NA	NA
5SrRNA:CR33362	0.0	0.0	NA	NA	NA
5SrRNA:CR33364	0.0	0.0	NA	NA	NA
5SrRNA:CR33365	0.0	0.0	NA	NA	NA
5SrRNA:CR33366	0.0	0.0	NA	NA	NA
5SrRNA:CR33367	0.0	0.0	NA	NA	NA
5SrRNA:CR33368	0.0	0.0	NA	NA	NA
5SrRNA:CR33369	0.0	0.0	NA	NA	NA
5SrRNA:CR33370	0.0	0.0	NA	NA	NA
5SrRNA:CR33372	0.0	0.0	NA	NA	NA
5SrRNA:CR33373	0.0	0.0	NA	NA	NA
5SrRNA:CR33374	0.0	0.0	NA	NA	NA
5SrRNA:CR33375	0.0	0.0	NA	NA	NA
5SrRNA:CR33376	0.0	0.0	NA	NA	NA
5SrRNA:CR33377	0.0	0.0	NA	NA	NA
5SrRNA:CR33378	0.0	0.0	NA	NA	NA
5SrRNA:CR33379	0.0	0.0	NA	NA	NA
5SrRNA:CR33380	0.0	0.0	NA	NA	NA
5SrRNA:CR33381	0.0	0.0	NA	NA	NA
5SrRNA:CR33382	0.0	0.0	NA	NA	NA
5SrRNA:CR33383	0.0	0.0	NA	NA	NA
5SrRNA:CR33384	0.0	0.0	NA	NA	NA
5SrRNA:CR33385	0.0	0.0	NA	NA	NA
5SrRNA:CR33386	0.0	0.0	NA	NA	NA
5SrRNA:CR33387	0.0	0.0	NA	NA	NA
5SrRNA:CR33388	0.0	0.0	NA	NA	NA
5SrRNA:CR33389	0.0	0.0	NA	NA	NA
5SrRNA:CR33390	0.0	0.0	NA	NA	NA
5SrRNA:CR33391	0.0	0.0	NA	NA	NA
5SrRNA:CR33392	0.0	0.0	NA	NA	NA
5SrRNA:CR33393	0.0	0.0	NA	NA	NA
5SrRNA:CR33394	0.0	0.0	NA	NA	NA
5SrRNA:CR33395	0.0	0.0	NA	NA	NA
5SrRNA:CR33396	0.0	0.0	NA	NA	NA
5SrRNA:CR33397	0.0	0.0	NA	NA	NA
5SrRNA:CR33398	0.0	0.0	NA	NA	NA
5SrRNA:CR33399	0.0	0.0	NA	NA	NA
5SrRNA:CR33400	0.0	0.0	NA	NA	NA
5SrRNA:CR33401	0.0	0.0	NA	NA	NA
5SrRNA:CR33402	0.0	0.0	NA	NA	NA
5SrRNA:CR33403	0.0	0.0	NA	NA	NA
5SrRNA:CR33404	0.0	0.0	NA	NA	NA
5SrRNA:CR33405	0.0	0.0	NA	NA	NA
5SrRNA:CR33406	0.0	0.0	NA	NA	NA
5SrRNA:CR33407	0.0	0.0	NA	NA	NA
5SrRNA:CR33408	0.0	0.0	NA	NA	NA
5SrRNA:CR33409	0.0	0.0	NA	NA	NA
5SrRNA:CR33410	0.0	0.0	NA	NA	NA
5SrRNA:CR33411	0.0	0.0	NA	NA	NA
5SrRNA:CR33412	0.0	0.0	NA	NA	NA
5SrRNA:CR33413	0.0	0.0	NA	NA	NA
5SrRNA:CR33414	0.0	0.0	NA	NA	NA
5SrRNA:CR33415	0.0	0.0	NA	NA	NA
5SrRNA:CR33417	0.0	0.0	NA	NA	NA
5SrRNA:CR33418	0.0	0.0	NA	NA	NA
5SrRNA:CR33419	0.0	0.0	NA	NA	NA
5SrRNA:CR33420	0.0	0.0	NA	NA	NA
5SrRNA:CR33421	0.0	0.0	NA	NA	NA
5SrRNA:CR33422	0.0	0.0	NA	NA	NA
5SrRNA:CR33423	0.0	0.0	NA	NA	NA
5SrRNA:CR33424	0.0	0.0	NA	NA	NA
5SrRNA:CR33425	0.0	0.0	NA	NA	NA
5SrRNA:CR33426	0.0	0.0	NA	NA	NA
5SrRNA:CR33427	0.0	0.0	NA	NA	NA
5SrRNA:CR33428	0.0	0.0	NA	NA	NA
5SrRNA:CR33429	0.0	0.0	NA	NA	NA
5SrRNA:CR33430	0.0	0.0	NA	NA	NA
5SrRNA:CR33431	0.0	0.0	NA	NA	NA
5SrRNA:CR33432	0.0	0.0	NA	NA	NA
5SrRNA:CR33433	0.0	0.0	NA	NA	NA
5SrRNA:CR33434	0.0	0.0	NA	NA	NA
5SrRNA:CR33435	0.0	0.0	NA	NA	NA
5SrRNA:CR33436	0.0	0.0	NA	NA	NA
5SrRNA:CR33437	0.0	0.0	NA	NA	NA
5SrRNA:CR33438	0.0	0.0	NA	NA	NA
5SrRNA:CR33439	0.0	0.0	NA	NA	NA
5SrRNA:CR33440	0.0	0.0	NA	NA	NA
5SrRNA:CR33441	0.0	0.0	NA	NA	NA
5SrRNA:CR33442	0.0	0.0	NA	NA	NA
5SrRNA:CR33443	0.0	0.0	NA	NA	NA
5SrRNA:CR33444	0.0	0.0	NA	NA	NA
5SrRNA:CR33445	0.0	0.0	NA	NA	NA
5SrRNA:CR33446	0.0	0.0	NA	NA	NA
5SrRNA:CR33447	0.0	0.0	NA	NA	NA
5SrRNA:CR33448	0.0	0.0	NA	NA	NA
5SrRNA:CR33449	0.0	0.0	NA	NA	NA
5SrRNA:CR33450	0.0	0.0	NA	NA	NA
5SrRNA:CR33451	0.0	0.0	NA	NA	NA
5SrRNA:CR33452	0.0	0.0	NA	NA	NA
7B2	3.1673600570287532	5.65880792379267	0.798883607964933	0.742003141565899	NA
7SLRNA:CR32864	0.0	0.0	NA	NA	NA
7SLRNA:CR42652	0.0	0.0	NA	NA	NA
825-Oak	0.0	0.0	NA	NA	NA
A16	712.514367949163	666.0815164797154	-0.0969748984565226	0.672950989822062	0.879829322554142
AANATL2	12.0146333538135	3.086497221299825	-1.95649689344989	0.27770217658927	0.62974646184232
ABCB7	837.062038189879	717.8482109695135	-0.220846632776533	0.37414260161441	0.714383435266053
ACC	7550.892531698897	7466.50079116861	-0.0161538570210114	0.944771042125434	0.98356989317598
ACXA	0.0	0.0	NA	NA	NA
ACXB	0.0	0.0	NA	NA	NA
ACXC	0.0	0.0	NA	NA	NA
ACXD	51.90776297851693	91.91300956980665	0.821751216808494	0.467059837813387	0.781394540744045
ACXE	0.0	0.0	NA	NA	NA
ADD1	1103.1752565111	1610.6250650982201	0.54639372022474	0.012321275795253	0.111300397860526
ADPS	5.002319737902863	4.324915107058755	-0.21931499984321	0.90769202527747	NA
AGBE	769.52377253847	955.2310299216515	0.312499709711172	0.193744233607484	0.539345784996466
AGO1	6381.831587402703	6561.666930632329	0.0401442172194628	0.860249529886738	0.954911044524832
AGO2	10666.822609878674	10329.243115778325	-0.0463596064525447	0.902608945572451	0.97064715367601
AGO3	2098.033008061795	3221.9461103399954	0.618735579253609	0.292968700233835	0.646230596399778
AIF	1658.396417864157	1599.49288667875	-0.0517193354738798	0.830119268236604	0.948616019375892
AIMP1	492.9972667225434	265.294958847202	-0.891987456421026	0.0193561520905819	0.148848090017017
AIMP2	1531.1198000846769	938.4973285369755	-0.705548742336066	0.026783770623929	0.180222879959662
AIMP3	525.8910555946023	341.85117320106053	-0.620104149397365	0.0411077152924134	0.231307128152234
ALiX	2324.49487629442	2146.666502085185	-0.115136441109119	0.596983325043245	0.851078233161358
AMPKalpha	1353.6273901515233	1506.538610573195	0.154048860174497	0.590792569698092	0.848286535588755
AMPdeam	5439.58227343608	5286.347102273656	-0.0412287081590853	0.87807061076335	0.961656536120852
AOX1	1034.0502480567811	963.8249532856426	-0.10234075940476	0.723449230681748	0.90239211202862
AOX2	117.69880201459966	120.131358298219	0.0259249629135026	0.947448543215658	0.984573523809861
AOX3	1886.075406301483	2139.6675998566	0.181975156007824	0.536998215842929	0.818095851724711
AOX4	0.0	0.64785142217196	1.38496720581544	0.755277060824762	NA
AP-1-2beta	3025.83110387864	1798.317719676205	-0.750323280542913	0.0193210891382187	0.148799720742067
AP-1gamma	2645.92566655775	1654.06172075961	-0.677320339381733	0.0570471602271632	0.279639231388412
AP-1mu	1427.9625005789733	1218.81570866205	-0.227820235515855	0.485060070352222	0.790478415479742
AP-1sigma	1653.7209930101799	1538.655583224315	-0.103597103468806	0.654645117745394	0.873128216111505
AP-2alpha	5667.07437717921	4551.110249422785	-0.316222438646528	0.274361378612848	0.627197654294349
AP-2mu	2274.43917837077	1747.820941034485	-0.379613009196712	0.288672156409776	0.641782221956936
AP-2sigma	1268.29614804357	1180.47790483674	-0.103223493634611	0.687661811925634	0.887544413785073
APC10	222.84053375843334	148.958679422184	-0.578642722028196	0.107296319266357	0.395779540004256
APC4	344.4556634634273	375.4978119104675	0.123312277428372	0.751715547097004	0.913795415124048
APC7	390.8283939891333	1078.675269058595	1.46404093206703	0.000915541765057392	0.0178668839169596
APP-BP1	505.3554642477097	466.192187634939	-0.115770362934668	0.638767993325851	0.866576253275088
AQP	7.448932645735	1.5814385830399051	-2.23368186508547	0.291664094392466	NA
ARY	0.0	0.0	NA	NA	NA
ASPP	1226.6389298186803	829.389780229116	-0.564132410844173	0.0462983248891152	0.248335709073017
ATP7	2083.213118667673	2712.8134446949352	0.380408552508298	0.276057105713585	0.627990970534601
ATP8B	450.31236738805563	632.665395713106	0.488451197850684	0.423202373772953	0.753363126554308
ATPCL	5111.153947189609	4192.37881643555	-0.285682380891975	0.243523882820516	0.598060384777738
ATPsynB	2765.9755796400636	1541.643160243495	-0.842927786212755	0.00443162404939486	0.0572953594286138
ATPsynC	36136.98178961387	22083.0426853304	-0.710505681480828	0.0136894579422583	0.119485285651289
ATPsynCF6	2764.8985045227564	1782.67036534196	-0.632887443521042	0.0594204855448363	0.285853991623368
ATPsynCF6L	0.0	0.0	NA	NA	NA
ATPsynD	3481.9447617243436	1902.4083085266052	-0.871756829202118	0.011795480943171	0.108334010675527
ATPsynE	2304.3120265754	991.5180906275835	-1.21616086667669	0.000632157354893673	0.0132894380521652
ATPsynF	1913.08455701882	1119.8021204446236	-0.772146062874307	0.0298161468439445	0.192142309537021
ATPsynG	2468.1977508236464	1566.2403521371498	-0.655797404891115	0.0159772406413394	0.131257029351369
ATPsynGL	1.9271642443669066	0.0	-4.05338221013364	0.363754815303715	NA
ATPsynO	3497.641169089567	1987.6557898059	-0.815005276345685	0.00894538324070627	0.0900020416912694
ATPsynbeta	30959.49962258237	22665.4160333483	-0.449876528085887	0.0944927689405075	0.371047345919389
ATPsynbetaL	21.913053718655163	16.86185385420805	-0.38721530773282	0.629314051749894	0.862426983471577
ATPsyndelta	1918.33504375934	946.1433931335071	-1.01915806868037	0.00436747125103449	0.0568210756596851
ATPsynepsilonL	12.024008283665433	32.23705500212215	1.41355305041893	0.297244965439808	0.64941752559995
ATPsyngamma	4598.924269091157	2470.317794289925	-0.896342462233324	0.00890429803324552	0.0897633085359244
ATbp	158.42968836346802	216.6529515510935	0.454185731193134	0.165205167149645	0.498168234352414
Aac11	3697.8379351570698	2796.513543038205	-0.402796458185421	0.079090621565669	0.336916927040245
Aatf	920.1881224113964	919.6210529053051	0.000149453213160768	0.999580069608646	0.999876066479718
Abd-B	10.934950035655833	12.82267448584525	0.251512281491571	0.836534638633441	0.949235081446591
Abi	1645.7360777467966	2124.379114466895	0.368051154250726	0.0856920001736438	0.351850876457323
Abl	2098.7573086816	2347.9552773560254	0.161749745850731	0.518640971564371	0.807062527154728
Abp1	1416.8195748425599	2488.018647960475	0.811796718103605	0.0130659309761465	0.115801991504956
Ac13E	798.58312629269	906.5406953719355	0.18185640005312	0.621390877418526	0.85972453805926
Ac3	26.471239997839835	33.68620679025505	0.339341187462116	0.626351090198747	0.86125415548871
Ac76E	482.1155642818856	1235.71988681402	1.35649669704372	5.74853110540533e-07	4.5387066582601e-05
Ac78C	45.2683522317319	31.1711810463472	-0.537114227486353	0.438303278510469	0.76278405801064
AcCoAS	466.6611415946697	847.7171246407361	0.862924191280492	0.00668241465620408	0.0748158170333365
Acam	0.0	0.0	NA	NA	NA
Ace	317.7704863279041	44.2407122442695	-2.84265658016841	0.00255406291277004	0.0383405989938759
Acer	1571.2830692986997	620.5683307026704	-1.34057626687318	0.0233304404366671	0.165846560437421
Acf	2076.4538120379966	2839.63178542235	0.451554829202725	0.0510024145866989	0.261147511915954
Ack	1063.0151020164542	1612.313692534125	0.599922441419377	0.117153222107096	0.415791736798926
Ack-like	1437.8976455894365	1438.0000247263301	0.00078021115523177	0.997565089211109	0.999400980018452
Acn	2535.7326373047567	2010.89054566963	-0.334203406749586	0.228771129590388	0.582161896834283
Acon	6636.497508601754	4573.96773041001	-0.536812728431961	0.108206845081745	0.397861144216314
Acox57D-d	352.61270866247804	1431.14463269253	2.01893031274538	0.007182153402263	0.0781125264349172
Acox57D-p	424.77560802312496	1381.30150989661	1.6994413614035	0.00623376225712529	0.0715602697285759
Acp1	0.0	0.0	NA	NA	NA
Acp24A4	4.558186279184633	0.6287564359769635	-2.85585450352158	0.240765464450071	NA
Acp26Aa	8.672239099651067	4.61065084575474	-0.906485938364658	0.717752916413732	0.899190699426748
Acp26Ab	0.0	5.77337784096266	4.54392613512364	0.166562177309246	NA
Acp29AB	0.0	5.982733634878651	4.59583878569347	0.140585036498731	NA
Acp32CD	1.0557866856762501	0.3239257110859805	-1.75343256169127	0.696750478411313	NA
Acp33A	0.0	0.0	NA	NA	NA
Acp36DE	2.1115733713525033	1.2384178857589305	-0.802978247262777	0.800317442997357	NA
Acp53C14a	2.4635022665779203	4.05827435455777	0.677977550963417	0.794349770137463	NA
Acp53C14b	5.760724489472994	2.8389514549938353	-1.04794077571075	0.618829135497394	NA
Acp53C14c	1.0557866856762501	7.14477157585759	2.65794605313636	0.260349821507789	NA
Acp53Ea	0.0	4.17284427172775	4.0754788641899	0.271816154355134	NA
Acp54A1	0.0	0.97177713325794	1.9711394364936	0.654546505538498	NA
Acp62F	0.0	0.0	NA	NA	NA
Acp63F	2.6569848985296667	0.304830724890983	-3.07836579276138	0.457867266759378	NA
Acp65Aa	0.0	0.64785142217196	1.38496720581544	0.755277060824762	NA
Acp76A	0.7038577904508333	1.276607858148923	0.766760372609336	0.835989869682707	NA
Acp95EF	0.0	0.609661449781965	1.30528413248232	0.769270538241484	NA
Acp98AB	0.0	8.44047442020151	5.09258761757906	0.0631547892586452	NA
Acph-1	1548.50508267232	2015.41330118093	0.37966850459835	0.177185273919287	0.516119233324781
Acsl	8940.828402390804	15597.561607951851	0.802717622903095	0.0948541800577588	0.372042769942131
Act42A	17524.538343854234	39378.6672622554	1.1680595785903	0.000487306722973794	0.0109569857298216
Act57B	451.46743220364965	151.4115968279043	-1.57653125569014	0.0274452091477392	0.182482749952978
Act5C	64460.254143974504	44198.09536460835	-0.544414228616814	0.0590583861861095	0.285040078545465
Act79B	5.35424863312828	4.36310507944875	-0.307889577009394	0.86471099068284	NA
Act87E	15.857267103885727	10.403123672912395	-0.604344107096107	0.641478916934981	0.867489952709177
Act88F	0.0	0.91449217467295	1.88896676350255	0.668385009972474	NA
Actbeta	11.4500126590809	58.34068364249265	2.34012363492935	0.0459560511595901	0.247822438552471
Actn	4557.971663257083	2120.304501343055	-1.10388346640493	0.00355779927065298	0.0491299303823282
Actn3	5.368263180599509	9.77436723693541	0.890520325806957	0.521010704408092	0.808254079484248
Acyp	1.7596444761270866	0.9335871608679456	-0.950857433154934	0.776560710553334	NA
Acyp2	288.83730516759465	248.6240548549435	-0.214917278507133	0.524227105223166	0.810897208608116
AdSL	895.078188785422	873.9291217102154	-0.034088250623167	0.892651542138583	0.967254564792016
AdSS	2726.94126206699	1860.24068112684	-0.551396235510379	0.049540414469237	0.256634797837714
Ada	123.56493703499267	65.65662103987624	-0.911058296248069	0.0243113713274103	0.16955665113918
Ada1-1	23.818641139350333	10.021913003241425	-1.24090062807539	0.126210759826174	0.433283280264123
Ada1-2	152.59470059016186	107.4020915806616	-0.503653230744752	0.303670804602331	0.654474462501765
Ada2a	183.85613376557168	186.0341469959435	0.0132446731294344	0.972367148400456	0.993100541562347
Ada2b	1108.3758420404968	1469.72909469771	0.407244040641184	0.0749480414116826	0.32777488047401
Ada3	589.7961134970443	548.1235413365814	-0.10570951985908	0.678458609402509	0.883065327938242
Adam	3499.8554155901134	2804.24267958959	-0.319353361323689	0.321253721023034	0.66990468478654
AdamTS-A	2969.1828452314426	1569.8739119480301	-0.919057618105409	0.00262466353168522	0.0390735205036028
Adar	1500.0244751994233	2046.66292933475	0.447557996007619	0.112029193028819	0.405168182918549
Adat1	125.627713067775	131.0111675717775	0.0562152811433378	0.892821307556619	0.967254564792016
Adck	569.3492531569353	397.526138372772	-0.516756461164096	0.138700907454277	0.455729446085969
AdenoK	944.8648251063511	871.7571166635885	-0.115641660173453	0.6895618345695	0.889020714628382
Adf1	836.9037183313457	812.279002500144	-0.0436848016866913	0.882316943551008	0.963247218402794
Adgf-A	1059.8139481810565	1947.8439347826302	0.877973876398555	0.0401992461924253	0.2290803324343
Adgf-A2	18.419474052533833	92.40810110241864	2.33887493648543	0.000615806619157229	0.013034961851914
Adgf-B	3.686808720493993	11.222140916610346	1.58162668236973	0.316657437721453	0.666471544778443
Adgf-C	4.612733240303933	4.401295051838745	-0.0954267850841738	0.959020565751479	NA
Adgf-D	17.949377730103702	4.68703079053473	-1.93250150426189	0.121449126091404	0.424079985194286
Adgf-E	0.0	0.0	NA	NA	NA
Adh	9.9789301896729	5.03005148781571	-1.01063410976785	0.482354683009899	0.789395693063228
Adhr	0.0	0.0	NA	NA	NA
Adi1	483.55791500763	467.1264638500355	-0.0519143297284408	0.872889601499762	0.958461514848118
AdipoR	4385.852740202016	7954.8016210037895	0.858754213986288	0.0111171115990809	0.10424685881169
Adk1	183.32624801463135	97.83708013764254	-0.906772198343674	0.0139880731232715	0.120264871416456
Adk2	3264.9533881213865	2672.94184048596	-0.288452798589391	0.233775642754356	0.588879365432424
Adk3	1822.52471457931	2307.62470442414	0.340554322686073	0.166522946840965	0.500100708239286
AdoR	9.803848145232573	8.059263750530565	-0.269900621454489	0.837563002930711	0.949453672528453
Ady43A	357.534242496517	271.5832122612005	-0.395273358896915	0.325462287867857	0.67240243862808
Aef1	1778.2473297680965	1944.897105420535	0.12978464445472	0.608942199395264	0.854637816644333
Afti	1341.8037891117701	1652.8145437010899	0.300334598081503	0.199391926966369	0.545291114910765
Ag5r	5.982791218832101	2.896236413578828	-1.06622209319304	0.690594222304865	NA
Ag5r2	3.719778857941533	0.0	-4.99924758565073	0.259791086700926	NA
Ahcy	4139.777122699984	2932.51243780004	-0.497217801839642	0.0302910182158166	0.193753866052067
AhcyL1	2162.6394499875164	3568.37034001107	0.722112060012549	0.0204620569002544	0.153695754915999
AhcyL2	35.437489301873306	46.3384045088033	0.379038239755186	0.706343280445684	0.894714218148554
Ak6	220.18587480108533	339.9635257846715	0.622514059429463	0.241154455022774	0.595064833986637
Akap200	8189.24180579757	12778.4767051125	0.641823836985628	0.010409201967592	0.0997535401893079
Akh	4.2231467427050005	38.29754669023875	3.1254041231785	0.0653509463412037	0.303241291165128
AkhR	1.0557866856762501	5.65880792379267	2.32813785534373	0.347533220110743	NA
Akt1	3482.45149308189	3302.571133394065	-0.0764840060585609	0.701855740892573	0.89280662196676
AlaRS	6343.912673096506	3317.04542491967	-0.935287673134326	0.00702357850490752	0.0767916199537616
AlaRS-m	675.9164797740283	547.7423306669104	-0.302976079458029	0.268940402957063	0.622769172414054
Alas	803.6720192158683	543.0580560932915	-0.564744302082918	0.0950902228304133	0.372403701149173
Ald	4532.576645237173	4237.694360340575	-0.0968338990657681	0.715285930933172	0.898472403318125
Aldh	3982.5340982182065	3738.448658144515	-0.0912765001474197	0.67015499191892	0.879509336558482
Aldh-III	1790.1985946489433	5901.61736262755	1.72040666347042	0.000981910739639726	0.0189122956798765
Alg-2	1408.1212710522102	1528.72845609782	0.118457267851775	0.714771363937127	0.898175217738027
Alg10	298.672807715072	260.28469139981	-0.195715120330173	0.576969185387921	0.841169829327612
Alh	2092.4536777306134	2391.0045208596903	0.192494067573677	0.465859059774904	0.781316726974516
Alk	0.0	2.591405688687845	3.3877815884021	0.436843284238986	NA
AlkB	238.473472408166	306.605379030876	0.361419891629497	0.383109960732455	0.721320753365979
Alp1	1.0557866856762501	3.181972152274815	1.51726589280183	0.600335439571287	NA
Alp2	59.0932502906031	5.449452129876675	-3.44337255505248	0.00363247994558055	0.0497849295428321
Alp4	3481.0463615809967	974.878194075631	-1.8361929425295	0.140914082439675	0.459191668139118
Alr	205.93010120256702	185.6556925431885	-0.147646148268212	0.662063270093998	0.875824432556228
Als2	1408.8557402525032	1850.96691785635	0.39310064759939	0.127001760795937	0.43424518728118
Ama	0.0	0.0	NA	NA	NA
Amnionless	0.35192889522541665	2.4768357715178597	2.36276392822499	0.478639640573461	NA
Amph	1672.5459675275433	1527.357062362925	-0.130619322047207	0.703683697437101	0.893542636941407
Amt	6.615466266996973	8.497759378786505	0.362181814667727	0.76849968077314	0.922536343604809
Amun	4094.86023415125	2851.0039300116	-0.522133654546359	0.161498205313277	0.492271402303951
Amy-d	7.24607508393132	1.29570284434392	-2.48664507341439	0.311205020721118	NA
Amy-p	2.8154311618033367	0.952682147062943	-1.59366568710626	0.607540746913511	NA
Amyrel	47.47444997538687	27.455238334841397	-0.786797380026865	0.198372439051745	0.544235049631884
Ance	339.29003087284303	361.993230355434	0.0909756578600113	0.896645103119015	0.968400120385507
Ance-2	24.591361863277466	25.1502574390785	0.023442339066962	0.982408771956877	0.994913730377947
Ance-3	17.035401526534436	10.288553755742415	-0.721873406407613	0.520513653835781	0.808055966310063
Ance-4	0.0	0.91449217467295	1.88896676350255	0.668385009972474	NA
Ance-5	18.0654789260779	26.06474961375145	0.521650195227654	0.518582072219687	0.807062527154728
Andorra	0.0	0.0	NA	NA	NA
Ank	10010.72307817911	10984.853198758901	0.133903136762901	0.60679304876287	0.854001973513998
Ank2	4.927004533155833	14.537088918021185	1.52909200232687	0.472194468418208	0.783016029978281
Ankle2	1675.9884307661202	2416.6921941291403	0.527597999836477	0.0404895017614848	0.229974144271849
Anp	0.0	0.0	NA	NA	NA
Ant2	438.16073205752764	137.73516039711598	-1.66970475473204	7.38920033564482e-05	0.0027005830060627
Antp	23.3911434617988	17.776346028881	-0.392107133898727	0.631850352868302	0.863602269685623
AnxB10	701.6690155843495	548.6908784885995	-0.353943716491676	0.308462434419867	0.65917912380262
AnxB11	1613.9764664825434	1597.876703394465	-0.014118573625493	0.970784012138137	0.992373244622979
AnxB9	4815.481750900087	8223.69559349285	0.771904061391875	0.10652671809242	0.393642674251484
Aos1	1521.681852359	1371.9472323559648	-0.14935205565534	0.584324193784843	0.845412505816573
Apc	2666.56380250453	2488.52663299122	-0.0996514594063533	0.723376897814408	0.90239211202862
Apc2	366.2349282840277	611.1689726473455	0.736710788392136	0.0170402386555651	0.137371152310608
ApepP	1849.5024112121334	1532.964786816195	-0.270487429930523	0.414394180742336	0.746584363036207
Apf	364.1252776019857	311.8052182317595	-0.223598372649066	0.4471763098423	0.768133928463952
Aplip1	1.1856488515425598	4.096464326947765	1.73589123103191	0.429483192904127	NA
Apoltp	17.684712355865983	36.6956350125459	1.06136405429984	0.370060577545486	0.711854598739298
Appl	31.698247698797232	33.01926038188805	0.0533513396672414	0.968687754145571	0.991752817465634
Aprt	438.73677064379103	308.85238591382495	-0.505535609164542	0.169083927975843	0.50470984544794
Aps	6699.963015250647	6243.376798158575	-0.10169606359643	0.645631625023648	0.868129067726618
Arc1	4218.8424429899105	3547.74401765953	-0.250199343125243	0.650638245257203	0.871139336012331
Arc2	95.8332401360213	138.6121516536275	0.532461541409962	0.289753090942758	0.642817057433175
Arc42	477.0756388932527	500.510596132316	0.0701213907871161	0.834426094652143	0.949084773401657
Archease	429.0683764040077	415.39795933262803	-0.0471658927203477	0.863394064511068	0.955511128402234
Arf102F	3197.4256729776166	2347.7846020565103	-0.445411617321267	0.295341256713643	0.647780257638604
Arf51F	2559.2574479043137	2400.32336464486	-0.0921424762773794	0.761069940449678	0.919489124409651
Arf79F	20363.2960583397	12082.2699924271	-0.75304359662827	0.0154278962321403	0.12837548731217
ArfGAP1	2413.0791563467933	1525.58949729754	-0.661050320419643	0.0386588255621267	0.223435006081655
ArfGAP3	2973.3163751380903	1550.932082707025	-0.938580126930678	0.00437936116585929	0.0568327886304675
Arfip	407.19927878036765	452.64734894482854	0.154890018249507	0.679030303430356	0.883298310737708
Arfrp1	283.04925423190065	278.402680017514	-0.0209897162543739	0.957882129624922	0.987189058764786
ArgRS	1956.3886649077301	1506.89314666015	-0.376508747256663	0.193462869906097	0.539290316630934
ArgRS-m	313.0973006490016	358.5200100306315	0.196117362800985	0.528583971825962	0.813563098302965
Argk	5546.50509214256	3679.706979791925	-0.591792221160585	0.0531096236257022	0.267935951762875
Arl1	1113.1574914179764	642.053728900768	-0.793241663530799	0.0467265129293164	0.248863194247126
Arl2	188.20727193647565	205.14645300424502	0.124120054940003	0.724392359123112	0.90263596183273
Arl4	1406.3977046289667	1615.554818275455	0.200117386340627	0.444301496768265	0.767291136927545
Arl5	693.3686609391716	727.907624890916	0.0702401127948576	0.779768297357761	0.92838507107386
Arl6	17.791740046874033	11.6606365448663	-0.622531190480342	0.583595360955051	0.844994688775346
Arp1	2191.55793519315	1834.047779043555	-0.256786506860458	0.305597428599739	0.655630409460091
Arp10	445.45188347811296	252.8930631118755	-0.8161419927304	0.00604751008009801	0.0699296177578868
Arp2	3553.84187542085	3419.77082152323	-0.0552220176097008	0.815404605577544	0.944532404019324
Arp3	3093.44689171181	2352.617700726535	-0.394649732732031	0.239640698221968	0.594292606647155
Arp5	390.1175911132996	317.84385871676545	-0.294514152896432	0.295393830212257	0.647780257638604
Arp53D	6.745074855284167	0.0	-5.86446433518724	0.150179401545895	NA
Arp6	476.259654486323	367.6322542388025	-0.372204932601824	0.169968312899402	0.505907444616796
Arp8	279.60023964293833	303.02034500581954	0.116352867965877	0.679391990448712	0.883298310737708
Arpc1	1539.3968466060967	993.1317162271685	-0.631689198451961	0.0267877625997122	0.180222879959662
Arpc2	4346.408819968207	4284.777959832994	-0.0204417168534035	0.927590247419371	0.976583750355072
Arpc3A	773.625300798714	860.445702304064	0.15267396203699	0.705139806737137	0.894439664101325
Arpc3B	79.99326974708987	197.2024482251135	1.29500476718671	0.223799230067211	0.575934168592314
Arpc4	741.079641262531	600.42420638561	-0.302777159960461	0.23496648213535	0.589646364024663
Arpc5	948.8753668156543	601.6237452447506	-0.656549172496486	0.0520413397501158	0.265312828149093
Arr1	0.0	0.0	NA	NA	NA
Arr2	0.0	0.0	NA	NA	NA
Ars2	3867.907102565403	3280.98799457009	-0.2371198309478	0.462093072738303	0.778281819138946
Art1	2330.61819707462	2564.999576858005	0.138049757110048	0.599896695707442	0.851355650529545
Art2	0.35192889522541665	0.6287564359769635	0.383805903819919	0.931216155426294	NA
Art3	1140.8280270972566	989.087024424976	-0.205382651038297	0.432760877750091	0.759295294074502
Art4	1440.7814284252265	1656.784724188975	0.201739907066454	0.416456524148327	0.748070514589401
Art6	2.1255879188237334	0.952682147062943	-1.13390781158486	0.73062002944905	NA
Art7	517.294179547005	439.212945846515	-0.234848293471407	0.397022425068735	0.731457595740279
Art8	456.3171722369577	401.486870633668	-0.183605690810399	0.493004818208237	0.794012587157862
Art9	0.0	0.0	NA	NA	NA
Arv1	220.00101047058533	246.94851944938648	0.165963750581062	0.639926944707721	0.867489952709177
Asap	1976.41308883689	2984.67638973899	0.594125767917856	0.146150245372748	0.467418672817048
Asator	770.6409555760356	779.334054900349	0.0162871895357189	0.942644525563015	0.983118301048206
Asciz	161.76022999600332	202.87759491818548	0.324795097329759	0.414400157419595	0.746584363036207
Ask1	1331.1841369440288	2071.820077316115	0.63730922418804	0.0786993213947431	0.33663651000241
AsnRS	4453.982474845837	2399.8071109633647	-0.891918164738037	0.00477039801365196	0.0603919542903332
AsnRS-m	223.60982466862131	167.0950739718545	-0.416866842279743	0.28612941005613	0.639513765824373
AsnS	5296.3027328717135	5537.601733833701	0.064234765894915	0.776647177537757	0.927652028928102
AspRS	3120.9002750501836	2854.019559721955	-0.128895925650337	0.522347134623196	0.809217377945298
AspRS-m	1928.37432320416	1901.6014957268098	-0.0197787389819559	0.943515277469253	0.983420752678115
Asph	605.950864362022	591.372692407169	-0.0369490892612725	0.918576284388338	0.974990381672077
AstA	5.26204406963547	4.05827435455777	-0.37695371373414	0.840357520372289	NA
AstA-R1	0.0	0.0	NA	NA	NA
AstA-R2	2.4635022665779203	0.0	-4.43036871128354	0.319476299194122	NA
AstC	60.223882636465994	0.91449217467295	-6.03806779724665	0.155526539850542	0.483066366869117
AstC-R1	0.0	0.0	NA	NA	NA
AstC-R2	1.44537318327518	0.0	-3.63651776262877	0.417089458044239	NA
AstCC	0.0	0.3239257110859805	0.376537525008433	0.934136406989217	NA
Asx	2538.1156877822564	2811.91266255192	0.147527243913656	0.649798741589868	0.870937466038904
Atac1	166.40669410649198	188.34188410862203	0.17544574798996	0.616310438259367	0.856787481574816
Atac2	407.9432158089873	480.271685938509	0.23332480852296	0.452824451253123	0.77190763237138
Atac3	412.59083163934037	390.21089002961753	-0.0796294979616183	0.766071385801854	0.921548772196856
Ate1	468.43546155205496	619.172329547749	0.402258834817443	0.183742857220198	0.526339263320492
Atet	6739.819264612889	19648.0501365963	1.54347745610821	0.0352914069024775	0.21123785971778
Atf-2	236.66209769817831	290.370214449958	0.29747544318794	0.346151230437182	0.69328182417087
Atf3	594.9462530495547	979.415711715531	0.717349100559151	0.0586460533902209	0.283894779830017
Atf6	2310.8495911701534	2227.8878960264647	-0.0528693012637631	0.849407691190795	0.952232804191491
Atg1	1614.8343393967898	2359.64445711408	0.546514945170102	0.0971031062741074	0.377243590687114
Atg10	74.76358272842117	69.88743932441795	-0.104104243499974	0.831029421007939	0.948713986100782
Atg101	721.7288443678663	1045.35600133142	0.533143359742132	0.177463354739149	0.51630324097456
Atg12	162.08428767925167	167.744992556713	0.0494552682001771	0.89696729415707	0.968507435375986
Atg13	1386.6545523567536	2261.989567665625	0.705150409204114	0.0263454102568725	0.178565254447465
Atg14	392.95122736905097	364.0499764306615	-0.110912621471386	0.671679263801744	0.879799190939526
Atg16	657.291129806496	615.3411278648446	-0.0937959152348938	0.729404371419695	0.904366987963786
Atg17	4114.67349563053	5967.53166671495	0.536071091561633	0.159980176617287	0.49109228238971
Atg18a	2033.2258406904602	2468.1262037350953	0.279080293987459	0.508594832725678	0.800453422131625
Atg18b	1278.6537176438087	2042.1976573142501	0.674706127049264	0.160715582878243	0.491972941631277
Atg2	3148.7127284028265	4463.316442969484	0.50297276672038	0.110781907856451	0.403031049229432
Atg3	887.6757958578	934.4247825758265	0.0746756639225314	0.826326472314162	0.947529902795325
Atg4a	636.8467491861979	677.8587901044384	0.0894052805133438	0.733515901861786	0.90663933667822
Atg4b	1254.2542384378394	909.3345663122491	-0.463355376268702	0.1813908790855	0.522452203392182
Atg5	401.765842189983	576.5901248855284	0.519505554937541	0.148594823373189	0.471827433541057
Atg6	594.2160626497816	577.9219505395755	-0.0414535409714963	0.883536101625872	0.963649455383674
Atg7	732.0116333406708	1046.6579056638245	0.514724684493409	0.160865533178322	0.491972941631277
Atg8a	8739.426580686097	13927.3738735522	0.672189106997177	0.203216200904279	0.549516341212884
Atg8b	0.0	0.0	NA	NA	NA
Atg9	1078.926815514408	1304.66153453367	0.273205825568797	0.64802556623181	0.870096997653168
Atox1	2100.2927258589934	1014.180685959698	-1.04982688413011	0.0149280134731712	0.1249067592871
Atpalpha	15034.300806579267	11339.79821858805	-0.406812897696808	0.219783796180269	0.57146009275148
AttA	25.690809351455467	87.8165452428589	1.77055758260515	0.596269684887645	0.85103255160932
AttB	67.9523721046785	191.066265646446	1.4845386979404	0.195707879966558	0.540942437865876
AttC	2.89074636655036	0.0	-4.64021663410081	0.296465995745455	NA
AttD	0.0	0.64785142217196	1.38496720581544	0.755277060824762	NA
Atu	703.8786183629396	575.0781757049785	-0.290309142360003	0.341695587614425	0.690130338351103
Atx-1	1.4949791018893865	3.810728588251775	1.38972996078222	0.540063502739197	NA
Atx2	3594.01049651462	2017.451641324195	-0.832762967180517	0.0464563030326049	0.248447539951516
Atxn7	636.608348100558	607.4012574110866	-0.0685544717472893	0.803223268956188	0.938515394353124
Aven	78.9157524591125	69.48713366855199	-0.183618350519886	0.792430069252339	0.933249634274407
Awh	7.425289590832733	2.248384991406868	-1.71714695399063	0.412474665471982	NA
Axn	1139.890215141356	1283.503308785585	0.171424205527165	0.575712248127049	0.841019935133662
Axs	232.34266177682636	242.35489642713998	0.0614705864100496	0.839933474845465	0.950507465060163
Axud1	1450.5427401139334	1778.007252917225	0.294185629242091	0.198514749313807	0.544342007204668
B-H1	0.0	0.97177713325794	1.9711394364936	0.654546505538498	NA
B-H2	0.0	0.0	NA	NA	NA
B4	4271.684429735787	7135.05343069469	0.739844067840505	0.0879617246993636	0.357902485667002
B52	5623.142369912833	3684.215265164415	-0.60983608035897	0.00900162118148524	0.090304333540351
B9d1	11.265603532095303	8.95534999323745	-0.331531481563411	0.848418453826563	0.951756189580059
B9d2	0.0	0.0	NA	NA	NA
BBS1	0.7038577904508333	2.21019501901687	1.54757079088532	0.631573384451223	NA
BBS4	0.0	0.609661449781965	1.30528413248232	0.769270538241484	NA
BBS8	27.4657260262403	20.596202497679798	-0.423078814095401	0.567428462562872	0.836670937074986
BCAS2	311.29434464256565	214.57779954389952	-0.536747343979403	0.155751239870802	0.483176861068277
BCL7-like	667.1292535876693	771.0790179082655	0.210362465867841	0.474670051744756	0.784643174875501
BEAF-32	711.6603288203606	794.2120973529641	0.159272479211368	0.513304880846877	0.803466651959998
BG642163	0.0	0.0	NA	NA	NA
BG642167	0.0	0.0	NA	NA	NA
BG642312	11.58219463375685	21.18745801549575	0.885114847255048	0.327253673992039	0.674259910378418
BHD	182.99478593814766	163.0565836577205	-0.164120531316869	0.616856418587701	0.857085698206957
BI-1	2646.2453489295062	3070.07712142986	0.214269297849038	0.569308898864377	0.837366601387123
BOD1	986.1095581423924	771.733759872727	-0.352841645524117	0.318000840540232	0.667562957927261
BRWD3	2531.57580337869	2143.60599039237	-0.239790319189734	0.453850747678393	0.772107963613674
BTBD9	299.9365365469773	386.7806830568075	0.367040001136454	0.294498527062696	0.647533644857453
Bacc	4096.05821594579	3653.4579723263	-0.164686106947133	0.558832800627114	0.832254522229841
Bace	4.575075637930433	1.276607858148923	-1.86498064649444	0.51200686417775	NA
Baldspot	4320.1885274461165	2002.602831138995	-1.10899471813192	0.00371474306553106	0.0503224772277683
Bap111	927.7957111550132	765.9555586521615	-0.275373398737059	0.451826049391055	0.771181091585922
Bap170	2038.4483006403334	1798.007376517485	-0.180951089608335	0.643110185478687	0.867489952709177
Bap55	1024.3474906951162	857.3345976627375	-0.256527174921406	0.295438301037474	0.647780257638604
Bap60	1409.0175145025303	1438.33960015247	0.0296331869171915	0.89052104184499	0.966507157176788
Bdbt	365.5805328702713	414.825109746778	0.182117427192285	0.539989673428817	0.820736692472337
Bem46	553.1855784612843	396.49776533515796	-0.479011373562948	0.118338453021427	0.418203056778368
Best1	1673.9553132531098	2868.639230072815	0.7764632716157	0.0323875545690243	0.201312786603016
Best2	4722.216196225197	2690.63531309221	-0.811551793145549	0.0419245809280909	0.234139276749052
Best3	5.285940702116867	3.20106713846981	-0.747427703592879	0.71836050049951	NA
Best4	0.0	0.0	NA	NA	NA
Bet1	717.795629395027	296.9237305079995	-1.27218401329493	0.0037287574890715	0.0504137760908059
Bet3	509.582246534427	396.28909859547105	-0.363098301009346	0.177508877975978	0.51630324097456
Bet5	325.02916245318994	316.5897911159565	-0.0402717933001846	0.900960323523447	0.970554169506014
Bgb	174.93691699376333	255.273734898189	0.542888477997825	0.226738170697268	0.578907158608206
BicC	0.0	0.0	NA	NA	NA
BicD	2761.869200619387	2223.31681326156	-0.312647271399238	0.32649729033919	0.673697038857864
BigH1	527.408854830304	2555.21162706871	2.27651416243145	1.27089029240017e-14	8.42413267421293e-12
Bili	15.384850972645935	14.51868298605515	-0.09229684860478	0.920653196635392	0.97538331680822
Bin1	610.0258420179271	489.6648425057735	-0.31624013585992	0.212964123151849	0.562915391198461
Bka	355.635323314074	297.323347109637	-0.25644056842061	0.402612831939197	0.73624903124949
Blimp-1	51.58638871731606	21.7971194652777	-1.23771332008498	0.0691528440136443	0.3124717630551
Blm	607.2924756526907	1034.604344527393	0.767624340463305	0.00917659390344646	0.0916153578603733
Blos1	245.92345697481502	186.9486391706165	-0.395665630030697	0.197413239321812	0.542466826329834
Blos2	230.69241264782366	193.7517681576505	-0.253689917006366	0.416742638889492	0.748070514589401
Blos3	311.766918656771	238.772618618999	-0.382655771417147	0.23989424315921	0.594733019414121
Blos4	102.35710468929726	165.1897096777285	0.683819438151035	0.14412641957968	0.464391384561584
Bmcp	683.8534602585623	695.9385887497531	0.0252342879757049	0.919863878851144	0.975088453330243
BoYb	360.7221274563033	461.2569220238695	0.355820640552087	0.233145608629438	0.587998277851603
BobA	0.0	0.3239257110859805	0.376537525008433	0.934136406989217	NA
Br140	858.8841449962277	868.2772043287125	0.0165067514234186	0.951670382062133	0.986087633907898
Brca2	479.661933863609	758.0115538730299	0.659662892306601	0.00808073801586888	0.0841682510555204
Brd	0.0	2.8389514549938353	3.5203013646291	0.398454128660365	NA
Brd8	598.3835941413721	427.79985506795447	-0.482700773599636	0.128825004731457	0.437151254572657
Bre1	1611.8552469264766	1578.07766693737	-0.0298563167806637	0.926381181409408	0.976583750355072
Brf	642.3308599851927	709.293855686371	0.142403729652063	0.566133640938355	0.836160276578482
Brms1	655.9881221077931	645.7512656803075	-0.0215808919585304	0.932533663803176	0.979068104097722
Bro	0.0	0.0	NA	NA	NA
Bruce	13250.7957096322	13901.439927550251	0.0691094353613756	0.779312317731294	0.928341338745774
Bsg	4774.8896324269035	7004.49207560863	0.552683701055059	0.0227884172167456	0.163453952338974
Bsg25A	0.0	0.0	NA	NA	NA
Bsg25D	1380.8293284723932	1853.711083434595	0.42520391518049	0.059240091532142	0.285251520817944
BtbVII	1713.74249655791	2093.225650298285	0.288546326156631	0.292149552901411	0.645387190444103
BthD	555.7253337135274	772.1994206057095	0.474112126373451	0.261850633067169	0.617751890569797
Btk29A	3598.3679466545836	5525.684990881985	0.618780987051454	0.00740376177230468	0.0793545160735205
Btnd	120.47001737143664	101.0954322346973	-0.248403920694485	0.587002704551483	0.846489613398614
BuGZ	1912.9837737925066	1561.2022305308	-0.293005477438609	0.181160047625726	0.522146490828505
Bub1	760.4500840828837	872.4629420985746	0.198868870549734	0.431900835192476	0.758581508558355
Bub3	935.5831049422956	922.5745742774685	-0.0201139332082724	0.93837039184292	0.980953759471405
BubR1	957.6166752988875	1142.08488321552	0.253692261336302	0.600837436155147	0.851763721210883
Buffy	203.04420631628054	211.20832280081947	0.053333034815896	0.931292352216976	0.978798577276718
Bug22	341.66792236108336	376.84942160493847	0.140216120009421	0.670656215124642	0.879659581544113
Burs	0.0	0.3239257110859805	0.376537525008433	0.934136406989217	NA
Bx	222.09815783392165	406.1575626549235	0.867849934559551	0.0264528709435769	0.178824865470206
Bx42	1262.4158823076734	1192.78294753263	-0.0811296097144758	0.752868933096811	0.914156781477332
C15	0.0	0.0	NA	NA	NA
C1GalTA	1291.9128857711169	950.754043979262	-0.443265899189437	0.139978861092662	0.457730433222069
C3G	1299.3729834989	1310.82626032552	0.0130187519736975	0.957466828199345	0.987055785110817
C901	0.0	0.0	NA	NA	NA
CAH1	112.2416683896334	19.60601943245585	-2.51923540582454	0.00116387758505116	0.0213439465641564
CAH2	151.46365678375432	252.03792305847452	0.730524995415432	0.0508095812939615	0.260995954002212
CAHbeta	192.37238995267867	324.91431751053	0.754186259770752	0.275806330802773	0.627925353179194
CAP	683.259161830574	1238.80224970995	0.856787655501741	0.00585402393452943	0.0684934044737986
CASK	1712.0009758221668	1395.612215197205	-0.294568133124575	0.179500613529159	0.519612327380938
CBP	1013.6871346578137	1181.92636757064	0.221274550960565	0.623509879034021	0.859866281449903
CCAP	0.0	0.3239257110859805	0.376537525008433	0.934136406989217	NA
CCAP-R	34.31929195399147	5.62061795140268	-2.60597898638269	0.105404825933562	0.392582684418735
CCDC151	3.1883818782356	0.0	-4.77546806432282	0.282253048290685	NA
CCDC53	57.09933719129714	61.9802464092184	0.119310180050798	0.844512707902587	0.951428948593137
CCHa1	0.0	0.3239257110859805	0.376537525008433	0.934136406989217	NA
CCHa1-R	0.35192889522541665	2.896236413578828	2.58618624549266	0.436557112216436	NA
CCHa2	96.60863404528743	21.911689382447697	-2.13724396787976	0.0306769693080001	0.195136465899536
CCHa2-R	0.0	0.64785142217196	1.38496720581544	0.755277060824762	NA
CCKLR-17D1	0.0	0.0	NA	NA	NA
CCKLR-17D3	1.0557866856762501	5.373072185096685	2.25557645297611	0.370951641651611	NA
CCY	0.0	0.0	NA	NA	NA
CD98hc	5938.421956231353	4310.63355218505	-0.46207083257872	0.228240242944225	0.581450451421705
CDC45L	766.1628717654739	828.070159018974	0.113278775658624	0.664450112411924	0.876918146315749
CDK2AP1	403.061435258742	422.61635463634946	0.0694570401431268	0.834614253646464	0.949084773401657
CDase	114.82413642675101	117.5774535276925	0.033553945596182	0.925586420950515	0.976583750355072
CG10000	2.1115733713525033	0.0	-4.21060444172556	0.344829010575961	NA
CG10005	48.4637413837031	40.03105610860965	-0.271369362566146	0.671889510886752	0.879799190939526
CG10011	1077.101177551807	1780.6409829036752	0.724147344319388	0.0252851164694933	0.174001303821669
CG10013	30.0139184274172	41.03964510579965	0.447893249570591	0.741794280803059	0.910308319197508
CG10014	4.42832411331835	0.0	-5.26014102537608	0.124407126255419	NA
CG10019	34.45237820332476	113.26956624414134	1.70408499932929	0.0509878670543091	0.261147511915954
CG10026	16.672586472691467	43.422384054800446	1.35585268640518	0.200478609089557	0.546378581142638
CG10029	0.0	0.0	NA	NA	NA
CG10031	2.89074636655036	10.555194508243405	1.8826707918979	0.398380960553135	0.732525204444635
CG10035	5.5337167176087965	0.0	-5.58592030995311	0.0312760536024012	NA
CG10038	374.818444585569	315.2715480142725	-0.248598028054006	0.363551164498605	0.706437326801174
CG10041	23.098702570197734	27.4368324028754	0.236029086481673	0.74926600730522	0.912583409509879
CG10050	207.59331295812663	185.1578447936605	-0.162780203370723	0.71372210043103	0.897838443779877
CG10051	4.0576932056957205	23.07303826919765	2.47968006817393	0.0706129815613596	0.315849781941925
CG10053	138.65547637837028	109.517500722933	-0.336393745030608	0.479526962592932	0.787511491600301
CG10055	767.2593924907337	969.466733385928	0.337138285428377	0.146272324933847	0.467664499780768
CG10062	218.39860655818833	415.471583060492	0.929785113459815	0.0912939728449937	0.364085640863838
CG10063	56.8391057044063	58.32158865629765	0.0405862426173663	0.93214180214189	0.979068104097722
CG10064	7.595684170347101	10.3649337005224	0.430852708913555	0.780511762699281	0.928659054595498
CG10068	430.78074500703934	469.45191784045153	0.123256924217894	0.76213239105997	0.919780005443864
CG10073	4.927004533155833	25.55056309494455	2.33380213772039	0.211936181426767	0.562209778019249
CG10075	252.29663303458133	213.4900743850135	-0.240529769770708	0.520452317983878	0.808055966310063
CG10077	10079.552588433973	8348.241922852845	-0.271822266694838	0.345163461628952	0.692939767784987
CG10081	2.4635022665779203	3.829823574446775	0.595178428203331	0.823946467601444	NA
CG10082	2323.05929355761	3766.8294135216947	0.696801102629007	0.0458206613093878	0.247221231050077
CG10086	25.27389640763567	0.952682147062943	-4.74357406516634	8.29624267290674e-05	0.00295889786089222
CG10089	96.73793710435204	104.77387402804175	0.109068925211574	0.813983860471202	0.943878347096145
CG10096	0.0	0.0	NA	NA	NA
CG10097	0.0	0.0	NA	NA	NA
CG10098	680.7858232982568	650.746572466878	-0.063855782386006	0.837075760507581	0.949432458704892
CG10103	1569.5038922687834	2079.88209728356	0.405519529806098	0.172895524729442	0.509185197117488
CG10104	0.0	0.0	NA	NA	NA
CG10116	0.0	1.29570284434392	2.38680714623762	0.586313799071008	NA
CG10126	593.0308121776761	1719.43556080992	1.53522904087347	0.258507032587795	0.61465246851852
CG10131	29.6310377786681	19.567829460065852	-0.592770353416766	0.398728940758372	0.732904466725402
CG10132	7.807868814696033	3.4295179185808	-1.17768179943805	0.554551565439206	0.82948672125573
CG10133	183.31924074089565	287.035482408123	0.644609419630649	0.0357631438597492	0.212944256873733
CG10137	175.06819469378232	102.4682040780502	-0.769362732797184	0.0412687742444646	0.231520905580942
CG10139	278.00897136240167	287.1104842444455	0.0448807666328936	0.88952426720155	0.966043343632717
CG10140	1.44537318327518	0.3239257110859805	-2.16233781211669	0.628981196049373	NA
CG10147	121.0796624511794	293.151191892138	1.27050479480701	0.00683534431119166	0.0760193185060811
CG10151	134.11064984524234	87.3780496146029	-0.62064213815158	0.240439766524158	0.595064833986637
CG10154	0.0	0.304830724890983	0.332305500826944	0.941902006605117	NA
CG10163	756.5846984714586	312.74087255531504	-1.27546065254534	0.106266910767918	0.393642674251484
CG10164	0.0	0.3239257110859805	0.376537525008433	0.934136406989217	NA
CG10165	255.10804176958231	170.716230806614	-0.577581372651237	0.106186204670933	0.393642674251484
CG10166	1068.1100815696275	661.8288469920631	-0.689707539327865	0.0439999295984331	0.241044105845654
CG10168	0.0	0.0	NA	NA	NA
CG10170	24.534145821156088	0.64785142217196	-5.25539479560791	0.00272797814634816	0.0401929885579473
CG10171	341.88066200789734	478.84507440771654	0.483934871254549	0.104598367678267	0.391836623287329
CG10175	294.5274976118597	85.511564347096	-1.78612358092991	2.18027815888536e-07	2.08802009234734e-05
CG10177	5.318657261985316	0.3239257110859805	-4.05425604398354	0.0956644106493227	NA
CG10178	1573.0424113055833	2851.9795494804403	0.858205887325349	0.528469183070081	0.813507480353303
CG10182	53.19443632093927	21.73983450669275	-1.29172236637541	0.369843525456549	0.711854598739298
CG10183	42.1293226945314	15.4331751607281	-1.44868157269748	0.14379925378328	0.464105441897893
CG10184	731.516430630144	197.676377608844	-1.88675151833977	0.00453906623493719	0.0583924901342728
CG10185	12.246075013024532	8.917160020847465	-0.467272386132258	0.769135702251453	0.922753119237351
CG10188	1180.4057856608833	1195.3444318996749	0.0184807897011534	0.945638205567033	0.983977460782678
CG10189	272.38028530568465	234.4674875523645	-0.21471530753314	0.587756940141698	0.846706528250878
CG10194	356.6492242403024	278.27177133106454	-0.356544474636342	0.348515610057632	0.695076115743911
CG10195	345.1530730869443	391.03059632754446	0.182029197050879	0.550046858290283	0.827036308616971
CG10202	0.0	0.0	NA	NA	NA
CG10205	0.0	0.0	NA	NA	NA
CG10208	81.83568577284196	172.452496441901	1.06640218262551	0.0689438746565463	0.312159031584286
CG10209	398.09530974175397	526.3073268851085	0.402686650973877	0.144869963571911	0.465475027160458
CG10211	63.09235976733171	54.96776162826785	-0.204773932845911	0.840473438901607	0.950575918923928
CG10214	459.11818762745366	451.4232026656615	-0.0254872860651851	0.93159995404356	0.978822737967358
CG10217	1942.2003837597067	1601.56065762164	-0.278154845827878	0.483829850429386	0.790061910797464
CG10222	168.91072878671767	242.1469187416815	0.515195692887218	0.160831274445516	0.491972941631277
CG10226	280.630632808413	126.07728006916545	-1.15373964118181	0.067814244138748	0.308444471032133
CG10232	0.7038577904508333	8.097453722920525	3.37870836039226	0.142544332308167	NA
CG10237	2696.2254126427665	1163.52264321424	-1.21205213111406	0.000338236357179085	0.00834935236826557
CG1024	360.2336886303776	487.2452916928405	0.433686284320977	0.146798927990619	0.468623861792276
CG10252	0.9635821221834533	0.0	-3.04801822483898	0.499904590741136	NA
CG10254	3959.0858351770003	5417.315548483235	0.452526010996615	0.0870483226241257	0.355584834479199
CG10257	3.719778857941533	1.88626930793089	-0.960005130712277	0.732973233033312	NA
CG10262	41.844094806938365	44.43166210621945	0.0927574581941842	0.885455774920202	0.96430376031189
CG10264	28.329493461423755	1.29570284434392	-4.45373088474041	0.0429605915372043	0.238013400343869
CG10265	225.196511415554	216.84321235881453	-0.0535856349699785	0.892521838961804	0.967254564792016
CG10268	122.26963925874672	141.754555725055	0.218642123653359	0.632713960174179	0.864057338993291
CG10274	543.3161871606557	608.1793284654784	0.163178676394109	0.51839671242735	0.807062527154728
CG10280	1.7596444761270866	0.3239257110859805	-2.47698102205245	0.578723074550329	NA
CG10283	3384.769837872593	1361.1615199049202	-1.31388872144021	3.84016950133375e-05	0.00156373516347618
CG10286	1559.2529278942	1445.08062080131	-0.109398748612576	0.648093132545683	0.870096997653168
CG10289	3606.7922060365067	4112.77035903963	0.189172551021163	0.432219189851534	0.758602253628783
CG10298	2.89074636655036	0.0	-4.64021663410081	0.296465995745455	NA
CG10300	2.279093139592323	0.6287564359769635	-1.85460091859038	0.502780746883843	NA
CG10301	0.0	0.0	NA	NA	NA
CG10306	3837.7357288672138	2586.47552682912	-0.569095842248433	0.0229403847427854	0.164202352522235
CG10307	7.9379845581414585	4.077369340752765	-0.946783494474594	0.462614846252031	0.778791898232684
CG10311	73.69116026157826	123.998682790827	0.74533673709996	0.0754520044793616	0.329005093731044
CG10317	0.5313969797059334	0.0	-2.05938332249859	0.651692607716397	NA
CG10321	1322.4357830363567	1483.04272639079	0.165893280183499	0.53557285676874	0.817494745020656
CG10324	329.024291218051	345.302542322752	0.0720511154503868	0.846471928669793	0.951428948593137
CG10326	1054.5907906828863	1166.22586260318	0.144209045199259	0.591248024534287	0.848629669444349
CG10332	0.0	0.0	NA	NA	NA
CG10333	1319.0994439339665	1006.182152438899	-0.3899599083881	0.174544980078209	0.512147157148629
CG10336	239.64362285736001	294.581937748305	0.297942627533236	0.549982023401886	0.827036308616971
CG10337	231.2863781727007	446.341378653093	0.946313953608352	0.00763853815305419	0.0809481558576224
CG10338	637.606124505115	539.8556108463636	-0.239508088608437	0.566660738885594	0.836325916423188
CG10339	1.4077155809016701	0.0	-3.6344300497577	0.417367948842791	NA
CG10340	867.2816992270833	634.2024428356955	-0.451400639941038	0.04807679090266	0.253151731458746
CG10341	763.9183242084831	746.0072075766535	-0.0352010224094787	0.893080414424815	0.967254564792016
CG10343	608.9739383214693	593.8502172329155	-0.0346551867754766	0.926520942351041	0.976583750355072
CG10344	151.54593141493032	227.684831659983	0.58701869002701	0.110745771897826	0.403031049229432
CG10345	4.336119549825534	3.12468719368982	-0.46544291681773	0.85935702999874	NA
CG10347	495.672864071229	428.7872819162625	-0.208602773407982	0.496904347423182	0.795093748407679
CG10348	0.0	5.56333299281768	4.49154546730186	0.169989605509661	NA
CG10352	8.632768843626133	1.88626930793089	-2.21088754558976	0.26043148710652	0.616676481488722
CG10353	943.571445915079	790.4763706010344	-0.25505659325038	0.37167584107274	0.71353963290736
CG10357	2.4635022665779203	10.34583871432741	2.01153322203857	0.350010313299006	0.695515210461405
CG10359	22.60753657925407	66.55201822835414	1.55732048716318	0.217424004903124	0.569102349938867
CG10361	1.7596444761270866	1.29570284434392	-0.468819152782663	0.909312918590079	NA
CG10362	4.650390842677447	0.0	-5.33389613460258	0.109754767342476	NA
CG10365	1900.7716439839216	4946.98172254909	1.37951669044811	0.0687140107933328	0.311441285554532
CG10366	256.14849817258533	280.577441281057	0.134564580875394	0.692227746629965	0.8907979736111
CG10375	683.1624215527486	684.98515574833	0.00430357154053809	0.987726716502927	0.996396901276677
CG10376	901.2914654371643	918.060087416918	0.0262957918335219	0.912266103896871	0.973003522284062
CG10383	1777.4267466903832	1329.5334372983548	-0.418722747521085	0.0777111685087359	0.333930613317624
CG10384	2.4089553054586332	0.0	-4.37642762516465	0.32558008711412	NA
CG10395	435.52696572051235	653.179016777945	0.58406471479053	0.0887541225375898	0.3595706578168
CG10399	322.23374290661366	176.85034622259502	-0.862981617832845	0.0387234113319518	0.223502367972309
CG10405	4.237161290176236	8.28840358487053	0.959487597283073	0.580747658911042	0.843989466926641
CG10407	9109.18529858505	1894.578873664645	-2.26541203607794	3.94692040559906e-06	0.000235971085289659
CG10413	4176.737563818183	9374.25156150442	1.16606252557331	0.00638320403358033	0.0728713899771759
CG10417	4267.216954073304	4497.82333710169	0.0760107772622327	0.764460804576022	0.920585843599482
CG10418	260.8698181799696	160.884578611094	-0.694656588737852	0.038148650871064	0.221296408277855
CG10420	308.137330082735	161.5522140736895	-0.92890046083982	0.0619963578373505	0.293334093829696
CG10424	450.57177392582133	472.2697071465635	0.0658497294621477	0.84714592797879	0.951428948593137
CG10425	437.04562959223836	530.995735784101	0.282883291157227	0.443273680607165	0.766342205235769
CG10428	493.14534011473	547.1687920268315	0.148547417076116	0.587378512555531	0.846489613398614
CG10431	157.871821364892	189.06473736711598	0.262128244523391	0.476841306622504	0.7861692388008
CG10433	539.0087924540236	1286.702997815595	1.25502209310867	0.0373662885079478	0.218597014727208
CG10435	664.7137564486993	598.9150134219765	-0.150920760722906	0.557472239461377	0.831131404901451
CG10444	2077.6281310723166	1656.34022560487	-0.326798820544915	0.279792971529324	0.632505614790371
CG10445	198.10004861009065	444.0124793915325	1.16101131356805	0.00782583396131461	0.0823424218330387
CG10459	0.0	0.0	NA	NA	NA
CG10462	1264.0808841671626	1395.02558452678	0.141809537032138	0.652118033136613	0.871879112814372
CG10463	567.7308976667117	551.9342699248325	-0.0399411646624519	0.893834798072644	0.967552457265429
CG10465	1540.036839821493	1970.4571167424701	0.35545721829655	0.366103365744149	0.708858773665382
CG10466	125.53414492177335	149.4530819005675	0.256042876682224	0.498082443497097	0.795271705983031
CG10467	471.33724172348	226.237057980308	-1.05717181335082	0.00138773950242826	0.0246621815697861
CG10469	59.6357870065058	41.993016307091594	-0.5028154532097	0.531337477028445	0.81538569435493
CG10470	1197.8860895875512	931.984069614012	-0.361451385100942	0.371571994631802	0.71353963290736
CG10472	36.06179349379365	9.45044152584946	-1.92295471133806	0.0761487447070252	0.33106619020797
CG10474	0.0	0.0	NA	NA	NA
CG10476	0.0	0.0	NA	NA	NA
CG10477	0.0	0.0	NA	NA	NA
CG10479	423.48998457358067	325.25664915358254	-0.379860312129268	0.154875310267484	0.482056976857233
CG10481	0.0	0.0	NA	NA	NA
CG10483	5.361255906863896	6.172994442599645	0.207552227166989	0.886259390402907	0.964700155223876
CG10486	0.0	0.0	NA	NA	NA
CG10492	1248.6068490605219	1370.937265250315	0.135576036653474	0.637548190556861	0.866528391949786
CG10494	201.04659958894698	303.0790080728625	0.590175683024231	0.142563997449612	0.461565153549498
CG10495	176.93819074333433	161.9900206477165	-0.122961478793357	0.766367013984772	0.921582842186315
CG10505	33.7271971667813	45.4416292118674	0.417815974286353	0.552282754396288	0.828464181105265
CG10508	3.77901328398679	34.029227487536	3.10264733360366	0.0145235885929432	0.122626511687193
CG10510	1.0557866856762501	0.609661449781965	-0.824709076508051	0.851038461528509	NA
CG10512	993.0246440789036	306.90814259308	-1.69336767916769	0.0220830940557048	0.161182489474794
CG10513	199.74419884435167	2.495930757712855	-6.31325889072063	1.21544186108923e-21	4.19043838974862e-18
CG10514	332.436055560848	27.47433332103645	-3.59423408515462	1.30316274569667e-14	8.42413267421293e-12
CG10516	195.02026373564433	211.41354426936198	0.111890913231874	0.833625712076763	0.949084773401657
CG10527	2098.67631966387	1016.4072197479954	-1.04563788662944	0.00839769436828057	0.0861680087808789
CG10543	1700.7321407660265	1688.4381032698	-0.0102146751606316	0.976347009528104	0.993737169804092
CG10550	130.8655173651089	424.69495191468855	1.69302669817898	0.0509413990093325	0.261147511915954
CG10553	99.12294793002268	33.0383553680831	-1.58633982507497	0.000370397391791599	0.00886810236875118
CG10555	1214.6189173560288	935.985748064214	-0.375077867966638	0.300312066484486	0.652086871652806
CG10559	32.758674002092796	134.5156873266805	2.02330176688311	0.000149154721951906	0.00461888409924719
CG10560	79.76564888874493	37.72469710438885	-1.08344882340678	0.0696924513755878	0.313676686065146
CG10561	172.43934482151735	149.8717934883995	-0.205608008098023	0.601971664256076	0.851763721210883
CG10562	69.21791769457171	68.24871578279306	-0.0266961134637935	0.955639405684765	0.986818751123423
CG10565	3075.50560127008	2801.54014925488	-0.134296277091301	0.594178513677093	0.850247422103234
CG10570	0.0	0.0	NA	NA	NA
CG10576	13116.6966499158	9242.42431982104	-0.504981650661541	0.0749185611401552	0.32777488047401
CG10581	19.85547230595707	17.110088674743	-0.200996622623347	0.840454368011743	0.950575918923928
CG10584	85.66939366420483	146.2895156802585	0.778314836041088	0.0677290917686302	0.308200705573483
CG10585	385.607900747799	331.1050288308665	-0.217673795155009	0.489190687412461	0.792457106146103
CG10587	0.0	1.21932289956393	2.30332972291386	0.599762371259789	NA
CG10588	2.89074636655036	1.5814385830399051	-0.86272753200124	0.770205364202821	NA
CG10589	2.1255879188237334	0.0	-4.18573410925293	0.347779082580127	NA
CG10591	4.7825728173534	0.3239257110859805	-3.89019976906543	0.288638723458043	NA
CG10592	27.541041230987332	5.2966922403167	-2.37723040719373	0.00514888241049457	0.0637020224542408
CG10597	0.0	0.3239257110859805	0.376537525008433	0.934136406989217	NA
CG10598	0.0	0.0	NA	NA	NA
CG10600	2088.46773940685	1861.148282759225	-0.166128598020538	0.626433777025526	0.86125415548871
CG10602	3203.8656300903804	2533.6708125425002	-0.338280735680602	0.247571405630445	0.601391010142148
CG10616	1182.986311843477	621.2127368536981	-0.928826936726421	0.0183298199877993	0.144832183448288
CG10621	254.1908954622253	409.64574364054704	0.685014940815177	0.131284898696362	0.441313415170383
CG10623	6678.911236706357	4353.96804090539	-0.617291627898343	0.0261139328252252	0.177468215060174
CG10628	248.41296995241166	258.78032181577953	0.0572312897975896	0.85049069022632	0.952486451101814
CG10631	1477.4608681093935	2002.358041589605	0.438867608249172	0.0920287664623622	0.365956759523342
CG10638	1311.5654465355867	1145.7789747239149	-0.195393563490389	0.407936058458057	0.741318651921388
CG10639	473.89708101601195	399.81202428233996	-0.243380622713998	0.460787003753693	0.776967717610767
CG10646	224.139816350884	220.8837698356355	-0.0245486200396375	0.946999301415537	0.984538270527723
CG10650	86.90958947686666	176.62327355094152	1.02780172817617	0.00805594158917887	0.0839945603395938
CG10651	0.0	0.609661449781965	1.30528413248232	0.769270538241484	NA
CG10654	25.67779887759167	43.93725962783645	0.768691163116433	0.559630756788411	0.832723481148401
CG10657	16.858808253328466	6.95451076813659	-1.28607848554324	0.408844085368912	0.741360511137863
CG10659	0.0	0.0	NA	NA	NA
CG10660	453.20356693008563	735.6280022695396	0.696681054504028	0.0837657483968118	0.348647539504316
CG10663	29.11239769524687	263.63782937361054	3.15846741395421	5.97128577166474e-06	0.000328516003916641
CG10669	343.02376006186796	365.95671883324553	0.0908676115119478	0.778206129013655	0.92790807773543
CG10671	792.8279682452111	577.886516784101	-0.455625925676279	0.19497920638011	0.540083002568151
CG10672	662.097451610074	446.131333804948	-0.569296831590765	0.0201746589401859	0.152311311984192
CG10674	599.787698756016	346.785060703672	-0.788948037909733	0.0465953133605833	0.248523685286411
CG10680	1.6674399126342865	21.473193754191747	3.64453726002922	0.00979470364525927	0.0959342990557923
CG10681	134.29319847126933	167.610638599119	0.31523887115218	0.396267054245643	0.731310012188485
CG10694	0.35192889522541665	2.7625715102138453	2.52066962120527	0.452022480568889	NA
CG10700	5.391906235501783	2.19110003282187	-1.29784723417947	0.523852935485208	NA
CG10702	118.7047770513894	317.61609699088353	1.41614566757436	0.0072242100578555	0.0784873998197473
CG10710	0.0	0.0	NA	NA	NA
CG10713	0.0	0.0	NA	NA	NA
CG10721	282.4527255573436	297.266751205281	0.0759422078139295	0.814010902279055	0.943878347096145
CG10725	0.0	0.0	NA	NA	NA
CG10730	31.872219738307766	40.316791847305694	0.343748931718588	0.627371346078075	0.861350744843295
CG10731	110.216090651373	117.8822842525835	0.0966510274501445	0.789953419934681	0.932306247535279
CG10734	4.650390842677447	6.344849318354625	0.436743450201191	0.803763241334109	NA
CG10737	2392.1701472105137	4394.200382689385	0.876811310769567	0.0720660179430034	0.320037720662401
CG10738	410.610507285915	249.4826401794895	-0.719348816382937	0.257036706322424	0.612564666703416
CG1074	623.0524433719494	735.3401993681559	0.239610530861729	0.35718741024563	0.70163029611657
CG10747	192.69897317500931	243.215548914373	0.332770586458265	0.374072756494808	0.714383435266053
CG10748	0.0	0.0	NA	NA	NA
CG10749	0.0	0.0	NA	NA	NA
CG10750	0.0	0.0	NA	NA	NA
CG10752	0.0	0.0	NA	NA	NA
CG10754	641.3474597133103	384.1299252468475	-0.737944227150212	0.0382671947163955	0.221735347311865
CG10761	2.1115733713525033	5.315787226511695	1.27950062377695	0.606590076024148	NA
CG10764	10.633182061509526	8.840780076067494	-0.284412662781061	0.860216150027432	0.954911044524832
CG1077	1976.5936005853491	807.1295577155555	-1.29247668161274	0.0959111799822346	0.374778266061891
CG10778	563.551679645133	373.3285630807565	-0.592741536880871	0.0859699059080359	0.352718249891133
CG10793	4.16859978158572	12.89905443062525	1.61052396282897	0.286667608526474	0.639698613805679
CG10795	203.25648052287067	208.078123173298	0.0364832355222953	0.915251279622139	0.973113074129501
CG10799	4.9646621355293465	16.290382376816048	1.67520467934327	0.260158214890845	0.616275893014462
CG10801	57.87986353229476	28.236754660378402	-1.03459628550891	0.268385221698747	0.6225405579794
CG10802	712.1248334032074	520.9124034969004	-0.449760730039161	0.128027675863948	0.436019180592959
CG10803	1090.9571484046667	1301.327982068075	0.254479484277991	0.308313885198966	0.658997833150012
CG10804	8.85664822663667	1.276607858148923	-2.79981007653728	0.167058319174976	0.500921260454349
CG10809	375.561169782273	364.675976649723	-0.0401618574221219	0.901531524768662	0.970554169506014
CG10814	12.548096564749956	4.744315749119725	-1.38748235484638	0.321733917589981	0.670478909942779
CG10822	0.0	0.0	NA	NA	NA
CG10827	6.128734163400167	0.952682147062943	-2.67267721445969	0.222950162403127	NA
CG10834	0.0	0.6287564359769635	1.34557557205584	0.762187908052914	NA
CG10839	0.0	0.0	NA	NA	NA
CG10841	0.0	1.21932289956393	2.30332972291386	0.599762371259789	NA
CG10845	19.597862052761688	5.6779029099876706	-1.78639368384957	0.213261004031905	0.563484373329286
CG10853	0.0	0.0	NA	NA	NA
CG10859	39.28662317052294	11.756111475841294	-1.74930533192163	0.0241899179195681	0.169165869534883
CG10862	1.9271642443669066	0.0	-4.05338221013364	0.363754815303715	NA
CG10863	523.4456483863133	825.3457774811504	0.656551412442145	0.00467638519111019	0.0595663202360255
CG10864	38.586390687374966	27.2083816227644	-0.501012693180408	0.604731130126418	0.853073387738345
CG10866	139.9348512588804	239.44163219005299	0.777324936631334	0.0886257669819156	0.359345027208497
CG10869	8.576155651276327	13.20388515551625	0.597817415363326	0.739098212667106	0.909300917523001
CG10874	607.3591288130164	798.9966702371605	0.394640452319373	0.102968499676726	0.388919497164883
CG10877	78.27394582196605	104.563829179897	0.42556554032266	0.471804582966622	0.782783895031083
CG10880	430.46736775213566	584.8723269823386	0.440477218984954	0.131056300407483	0.44096139073344
CG10887	5.781492733100733	0.6287564359769635	-3.1964531528918	0.27255034954306	NA
CG10889	151.894224766144	152.311128341756	0.00664487098181667	0.985125254964022	0.995413662301462
CG10898	182.86487592497465	184.7207272738625	0.0176491246439487	0.963318997501026	0.989579260848676
CG10899	1.0557866856762501	0.609661449781965	-0.824709076508051	0.851038461528509	NA
CG1090	9.232473754343493	51.21431799860105	2.43672403620051	0.00669096304320181	0.0748158170333365
CG10903	711.959500138566	457.0267927935565	-0.638726533451709	0.11730530499363	0.415937185309947
CG10904	265.48024184817297	300.84765090496353	0.180015156657506	0.62352417179022	0.859866281449903
CG10907	286.7430182744867	347.3763162214875	0.274924931250519	0.361344377693022	0.70503393670608
CG10909	0.0	0.0	NA	NA	NA
CG10910	0.0	0.0	NA	NA	NA
CG10911	44.76075618989393	0.609661449781965	-6.17998190715893	0.00259264455273735	0.0387510442326047
CG10912	15.333432400380298	0.0	-7.05714700163313	0.00765194772163168	0.081007262318154
CG10914	206.99995028302067	200.5167071722955	-0.0451071909742964	0.89279821725005	0.967254564792016
CG10915	737.0717932119833	872.9048829979754	0.243840415301719	0.370939804108742	0.712608996495601
CG10916	414.95438794174265	694.3980963560185	0.740732074038724	0.169019288468414	0.50470984544794
CG10918	0.0	0.0	NA	NA	NA
CG10919	0.0	0.3239257110859805	0.376537525008433	0.934136406989217	NA
CG1092	10.670839663883035	22.80777562515463	1.08129123602869	0.486576133633967	0.79140485983073
CG10920	64.18751077771053	3.1628771660798147	-4.34199233250161	0.000105798643317505	0.00358485869959862
CG10924	93.27022460732944	111.5176508938045	0.260932617990316	0.675900464529611	0.881568537784334
CG10927	141.515873841169	117.72952436302299	-0.263499111420329	0.576722986448198	0.841095015345983
CG10931	14.449297945404952	3.9818944097777753	-1.84500691873709	0.190478850226783	0.534858280674482
CG10932	1656.7579564205626	800.5978928606245	-1.04866596688014	0.0313790019390687	0.19801892437815
CG10933	12.283732615398065	15.0137745186671	0.283935195621248	0.846856539881325	0.951428948593137
CG10934	0.0	0.609661449781965	1.30528413248232	0.769270538241484	NA
CG10936	1250.389140726614	334.382475914117	-1.90191341758808	7.60661974581836e-07	5.66009122525175e-05
CG10939	2046.8260986335865	2220.1240147738354	0.116697828322711	0.783947699536961	0.929881211004399
CG10943	4.59609745913727	0.0	-5.3095207412683	0.115896752637475	NA
CG10947	0.0	1.8480793355408955	2.90205652044776	0.506505862177014	NA
CG10948	973.45965511251	1124.30853718664	0.207571403184698	0.348672355516983	0.695076115743911
CG10949	237.294567016071	198.820698672085	-0.25341103608299	0.430929067998071	0.7578812022282
CG10950	0.0	0.0	NA	NA	NA
CG10953	0.0	0.0	NA	NA	NA
CG10958	127.45430189240501	97.9530281632705	-0.376588520040437	0.345042830867882	0.692939767784987
CG10959	131.52137002795232	175.65218547191301	0.419184110048725	0.265833825414169	0.62168349402588
CG10960	2486.5675927953503	4803.389224769715	0.949453425097165	0.0260291682367162	0.177244345215791
CG10962	22.56937182172233	61.8656764920484	1.45523277233603	0.0138189627360089	0.120264871416456
CG10969	23.549843302651567	12.47965378856426	-0.924138007822651	0.264245643460653	0.619915576737756
CG10970	9.983871232177993	50.96746128652405	2.32270968120504	0.127132474999403	0.434544345313557
CG10973	1039.2060333768193	1009.430857776744	-0.0413255489375383	0.878792665060466	0.962141688866349
CG10979	980.9871892348087	1341.03442341137	0.451034181758398	0.0470114874873721	0.249737963575701
CG10984	864.7706470364124	1044.590823775165	0.273153006367628	0.273938608705586	0.626619928185134
CG10993	0.0	0.0	NA	NA	NA
CG10996	1.44537318327518	1.29570284434392	-0.152069016804676	0.971740452311663	NA
CG11000	19.741992343678337	11.432185764755346	-0.781152498619985	0.445253478340628	0.767597639314966
CG11007	687.5334817766387	524.379422333643	-0.38991691048401	0.238920666051611	0.593103015197977
CG11018	0.9635821221834533	0.3239257110859805	-1.57384754249949	0.72723512058716	NA
CG11023	14.969301611335064	20.93922319496075	0.474476433029714	0.734653625012403	0.906939633862867
CG11029	31.083719660564668	16.957328785183	-0.878595330572091	0.378643300702357	0.718193225594073
CG1103	1079.620105756572	1395.591053048325	0.37034667876708	0.291395122307711	0.644520993488099
CG11030	1275.215447207738	952.946522120542	-0.420302071824244	0.205735959041263	0.552825707506548
CG11034	119.84773156344	215.5884557037765	0.847544893920098	0.0202923427878144	0.152753785629086
CG11035	222.93979344296864	235.325383822681	0.0801198335329611	0.793202930909245	0.933391162510045
CG11037	0.0	0.0	NA	NA	NA
CG11041	0.0	0.0	NA	NA	NA
CG11044	0.0	0.91449217467295	1.88896676350255	0.668385009972474	NA
CG1105	365.63366840157465	479.874825553788	0.393610273083999	0.262714714906718	0.61910646987473
CG11050	2232.8146341744537	4666.34197439763	1.06306284946292	0.0056664189713794	0.0671263409447338
CG11052	23.419473981627032	15.032869504862152	-0.641198158364997	0.6644219597564	0.876918146315749
CG11060	6.887138914970286	18.11936672616195	1.3923965389183	0.331327110185226	0.678505079676389
CG11068	0.9635821221834533	1.5432486106499106	0.698399128575201	0.840981311591123	NA
CG11069	1171.7607028597447	349.9868168963705	-1.74236465676326	1.33989123619672e-06	9.32800101164863e-05
CG11070	1237.3916805005001	1201.8556236599502	-0.0414695544438722	0.859890030361078	0.954911044524832
CG11073	1.0557866856762501	2.55321571629785	1.2057505773502	0.693802291560167	NA
CG11076	2822.9029713361833	2735.4634385187146	-0.0453053037369852	0.838524232318531	0.949850950613291
CG11077	236.3784288866577	208.631877772953	-0.177328122930529	0.646585210843764	0.868804075428265
CG11085	2.6569848985296667	0.304830724890983	-3.07836579276138	0.457867266759378	NA
CG11089	2838.7990792405303	2370.027107692335	-0.260021856075293	0.290115148356692	0.642905591156986
CG1109	1037.8962515085407	938.882673532022	-0.14373803964594	0.589509836936909	0.847016163227137
CG11095	81.31749476056324	105.15577375194209	0.365215013452164	0.434026067235066	0.759839474172697
CG11099	0.0	0.0	NA	NA	NA
CG11103	151.551876531043	121.940558607141	-0.310031101451462	0.40686085342832	0.740091770490524
CG11106	0.0	0.3239257110859805	0.376537525008433	0.934136406989217	NA
CG11109	420.9605420321077	338.30639631108	-0.314734296869309	0.27155138849317	0.624974239494928
CG11110	113.77510343723134	108.3179618637927	-0.0700051499415877	0.853648747020365	0.953105750759024
CG11112	0.0	3.486802877165795	3.81669891654783	0.322652082141798	NA
CG11113	1.5941909391178	0.0	-3.76607350974316	0.40002752361024	NA
CG11122	1505.0905576853966	947.229051129706	-0.667615689276467	0.0631207575961783	0.297023655967822
CG11123	960.1872175694838	747.1331227079299	-0.361134554969531	0.214354767300774	0.564735803112568
CG11125	174.51194485529402	180.3767171806085	0.0456783615784425	0.886962078480387	0.965160313279605
CG11127	511.84445441961003	260.3235704264285	-0.973892133836204	0.0114143272550119	0.105977007898194
CG1113	2.8294457092745664	13.8708315638832	2.32153303357299	0.143823248515538	0.464105441897893
CG11131	4.558186279184633	0.0	-5.30002350479041	0.12476226652087	NA
CG11134	379.60595844542735	291.0385389667835	-0.382576462607218	0.160915059609263	0.491972941631277
CG11137	651.5847150696446	655.351710878801	0.00706627997517617	0.981524702062812	0.994602722977923
CG11138	1058.0591170344887	1323.19478946806	0.322639281703293	0.343363929918386	0.69183751483848
CG11141	362.65227244326735	575.9770181646015	0.665196236652587	0.0305879881530332	0.194810074794841
CG11145	0.35192889522541665	0.0	-2.05938332249859	0.651692607716397	NA
CG11147	2943.8187427109265	647.4139075877306	-2.18479326399369	3.66529244133732e-08	4.46001408479434e-06
CG11149	2.1115733713525033	0.0	-4.21060444172556	0.344829010575961	NA
CG11151	923.3330402406314	1545.0912826262602	0.741572313758199	0.0699879397228314	0.314533167879924
CG11155	188.59369243462368	198.5165570014235	0.0733242280187663	0.859644895230618	0.954911044524832
CG11158	100.64535327708313	48.3569606116412	-1.05242468058831	0.113388778949124	0.407781690080246
CG11159	1.0557866856762501	0.609661449781965	-0.824709076508051	0.851038461528509	NA
CG1116	358.2681580025433	293.495590697877	-0.285547208096403	0.347966832325723	0.695076115743911
CG11162	1.0627939594118667	0.64785142217196	-0.689694673891521	0.875130243973145	NA
CG11164	121.5419429198301	255.6365396358945	1.06957641420592	0.00922144854512436	0.0918857825647603
CG11168	750.0168054463714	698.9705572293835	-0.102810298191094	0.712503396989165	0.897738781414053
CG11170	217.25489131340066	204.194459911411	-0.0870784658441108	0.800036459138441	0.936272583940812
CG11178	296.68651497598233	362.29668297186697	0.288031327937876	0.370077825357049	0.711854598739298
CG11180	1076.5758713064347	1554.928248723395	0.531143352596523	0.0273393636046266	0.18215292894972
CG11190	1113.074331677361	901.196855454252	-0.303889389267802	0.209933463339305	0.558760116139585
CG11191	0.0	0.0	NA	NA	NA
CG11192	0.0	0.3239257110859805	0.376537525008433	0.934136406989217	NA
CG11200	2777.5673562421434	1206.048941026335	-1.20326975508263	0.00160598807240625	0.0274557597237981
CG11208	1531.7994413723766	1452.824916545735	-0.0759435617047749	0.730110583672752	0.904770250765206
CG11210	1918.92507352699	3105.0790136371	0.693728138891792	0.0736936679556606	0.324346216027829
CG11211	6.686649009282934	15.75778992604305	1.2137557642732	0.583553759074595	0.844994688775346
CG11221	7.687888733839901	10.802740274549365	0.471027656568633	0.777753162058643	0.92790807773543
CG11226	11.69335478722598	12.5369387471493	0.106230990509582	0.921276152429692	0.97538331680822
CG11227	0.0	0.0	NA	NA	NA
CG11236	2.1255879188237334	1.29570284434392	-0.699640034761052	0.861958635567847	NA
CG1124	72.46095246524877	21.35862383702175	-1.76894736058983	0.113340799587074	0.407750918305777
CG11241	161.11536329072734	240.587331361753	0.5734446241181	0.237760482392516	0.592139819259762
CG11247	1079.3145279863686	778.2251675925811	-0.470987391595095	0.102658302569353	0.388082903316818
CG11248	601.5457759473976	749.0582710424794	0.314804617189585	0.259913283625312	0.616275893014462
CG11249	26.394667141906268	21.62595364375175	-0.29431747604151	0.888083391741904	0.965770846471087
CG11251	0.0	0.0	NA	NA	NA
CG11257	180.861937168009	190.531606032986	0.0769679654883098	0.811918684899331	0.943059249673731
CG1126	27.394844708840168	24.045504456684597	-0.195184038165743	0.869981177227303	0.957008619448412
CG11261	352.21011376731667	549.9088232797055	0.64469739153776	0.196662110658015	0.541457797895732
CG11262	0.0	0.0	NA	NA	NA
CG11263	126.77580001155741	270.858291840019	1.09182023166937	0.126530716605184	0.433490295411534
CG11267	2946.1384790196603	3061.471484143975	0.0555757122297428	0.835357044142824	0.949084773401657
CG11269	161.54506460905702	34.410438157207	-2.22865065590767	0.000296271924549639	0.00772065317367549
CG11275	233.67249900330103	319.5228393934675	0.448865272716986	0.270055992660467	0.623484963884313
CG11279	266.1002556946664	265.69457544883846	-0.00263029897119463	0.993187736973289	0.998173938514197
CG11284	2138.9620548592034	2802.18662256859	0.389726718836125	0.0609172005651763	0.290085914109401
CG11286	0.0	0.0	NA	NA	NA
CG11289	17.999237226296998	2.8389514549938353	-2.66308759062458	0.00972976281969336	0.0954790672145051
CG1129	2064.1283090630864	3199.537659326685	0.631846765981162	0.0422096060661296	0.235349841262522
CG11291	0.35192889522541665	2.172005046626875	2.17319610593392	0.528126658704486	NA
CG11294	0.0	0.0	NA	NA	NA
CG11298	0.0	0.91449217467295	1.88896676350255	0.668385009972474	NA
CG11300	0.0	0.3239257110859805	0.376537525008433	0.934136406989217	NA
CG11306	2058.80403142769	1184.801441835335	-0.796880743382483	0.0029763931799524	0.0429955791344242
CG11307	306.11205990173266	425.9885875963455	0.475225989024363	0.126363238965626	0.433283280264123
CG11309	826.8346559417813	1192.6616856053852	0.527311213129837	0.137555771404046	0.453263208776953
CG11313	16.329477504853067	11.755422421612325	-0.477130649366934	0.695873970045295	0.892254046523659
CG11317	0.0	0.0	NA	NA	NA
CG11318	7.0216885457625535	1.8289843493459	-1.94230845181328	0.42276256983053	NA
CG11319	2.1115733713525033	9.945533058461455	2.17090052898037	0.321037193492311	NA
CG11321	81.18369562579944	107.7833022503325	0.413573003044245	0.464337731103888	0.779650187144078
CG11322	14.097369050179537	13.7180716743232	-0.0215449543653165	0.984115246298925	0.99519084735329
CG11327	7.52944247056622	2.19110003282187	-1.77858784065106	0.189993309121035	NA
CG11333	0.0	4.11555931314276	4.05593465505669	0.261834897045258	NA
CG11334	783.6787110073	568.566983944701	-0.461881875400262	0.0940524487044765	0.370161520909589
CG11340	26.5047651377523	16.02374162431505	-0.739119187376897	0.467276457042422	0.781394540744045
CG11342	135.01334277069478	136.32626574405998	0.0142175111746701	0.976115803282143	0.993737169804092
CG11345	0.0	0.0	NA	NA	NA
CG11349	0.0	0.0	NA	NA	NA
CG11350	2.4089553054586332	0.0	-4.37642762516465	0.32558008711412	NA
CG11353	1014.8285813256025	298.73499797960847	-1.76343952726863	0.000159074349014836	0.00486776920668771
CG11356	0.0	0.0	NA	NA	NA
CG11357	828.7117864379089	906.7928659856279	0.129539559667453	0.605690573778207	0.853506101336021
CG1136	218.87605532220996	286.2553441910445	0.383102174324171	0.417734395059701	0.748679058759744
CG11360	1614.3820702622868	1379.332659155835	-0.22658764041286	0.352590442941851	0.697693313821995
CG11362	0.0	2.4577407853228603	3.31322398729918	0.44716207583298	NA
CG11367	205.81294808567864	374.90862355533795	0.866407901230459	0.0136006637312088	0.119090968670308
CG11368	0.0	0.0	NA	NA	NA
CG11369	0.0	0.0	NA	NA	NA
CG1137	0.0	0.0	NA	NA	NA
CG11370	0.0	0.0	NA	NA	NA
CG11373	0.0	0.0	NA	NA	NA
CG11374	64.90761336220143	142.747495007195	1.12970758903498	0.32191803797504	0.670478909942779
CG11377	1193.5729378177932	794.9404630452896	-0.585558370005261	0.104684388814214	0.391836950458604
CG11378	2062.2996184246635	3365.3705955792	0.705968340590134	0.0790525233624991	0.336893386542369
CG11379	10.054245394419935	6.573300098465619	-0.62279301203136	0.640624678238263	0.867489952709177
CG1138	0.0	0.0	NA	NA	NA
CG11380	33.4931821211815	46.375216372735295	0.458106284059476	0.468974246243709	0.781394540744045
CG11381	3236.900996687427	287.824578330179	-3.49175378950109	1.47898078538465e-07	1.48515517118771e-05
CG11382	499.6956726588399	449.635853559851	-0.150505487246915	0.740405770763272	0.909914326688262
CG11384	10.394225973404653	10.593384480633414	0.0243768135386938	0.987649710309642	0.996396901276677
CG11388	141.50050594789732	201.8485328263425	0.515169245292127	0.158388743310908	0.488046384818446
CG1139	12.420855632579093	0.952682147062943	-3.7172063362267	0.00857958970325258	0.0875567280562292
CG11391	0.0	0.0	NA	NA	NA
CG11396	684.5968709668086	627.5336678062545	-0.125552478586619	0.739195971065148	0.909313026727739
CG11398	253.632658718039	253.178109796342	-0.00178176623506988	0.996629219482115	0.999325905399045
CG11399	1229.94116420094	1609.00543654279	0.38780893681029	0.111650290846609	0.404688568783168
CG11400	123.40171374455197	392.3044479687775	1.66400276720878	0.0572236089002432	0.279910588507162
CG11403	336.8940491987487	430.25966301596395	0.352301660909748	0.487122967380599	0.791938518015959
CG11404	0.0	0.0	NA	NA	NA
CG11406	0.0	0.0	NA	NA	NA
CG11407	17.072055055300535	10.422218659107411	-0.724258868163725	0.698979680961826	0.892403533472705
CG11409	141.07844623130015	111.70791170152555	-0.332695824540973	0.516841880667867	0.805924253241029
CG11412	1238.6095428610934	1220.94814562783	-0.0198902340741957	0.946227252376628	0.98419433541145
CG11413	0.48179106109172665	1.257512871953925	1.3838313021726	0.717625717394277	NA
CG11414	1763.84176707829	1675.0255513745951	-0.0747152932583263	0.737090704819503	0.907800504407046
CG11417	1189.5166486013388	1179.6963885112	-0.0113234553435285	0.978414566597238	0.994602722977923
CG1142	611.9298703625497	621.5318391851811	0.0232344383807297	0.928223550459786	0.976684143639006
CG11425	2.9829509300431565	4.077369340752765	0.439875644410371	0.822049364877677	NA
CG11426	138.33193608698866	137.335543795479	-0.014968126101743	0.968813861895399	0.991752817465634
CG1143	38.37264696695366	17.94820090463595	-1.1049164820125	0.103256199540288	0.389205128223468
CG11436	226.629476974737	305.13644320231947	0.429658820161433	0.125389503471101	0.432157159080838
CG11437	2.8154311618033367	2.267479977601865	-0.333984450796929	0.926915464157088	NA
CG11438	15.51234548239593	4.4967699828137295	-1.78346470434264	0.251528968409212	0.605919237427922
CG11444	3209.3798027092867	1976.15687085557	-0.6993092613582	0.034173514844642	0.208203150752891
CG11447	98.09932280174992	98.12419398479639	0.00640927558257598	0.98898527916697	0.996848450893614
CG11448	1091.891697358302	1200.2231016063852	0.136202776611013	0.585252985807684	0.846001890883912
CG11449	0.0	0.0	NA	NA	NA
CG11453	12.082687707245801	1.600533569234903	-2.91402551956005	0.0703933259945422	0.315586198618612
CG11454	320.79375573264934	330.458555517153	0.0436657130647881	0.884628979391402	0.963838358142344
CG11456	197.2779276978217	192.379685368527	-0.0386871641053571	0.905296624767099	0.971012419712527
CG11458	0.0	0.0	NA	NA	NA
CG11459	0.0	1.943554266515885	2.9724157432823	0.496065131385296	NA
CG1146	671.0713028289414	1024.1685433159237	0.608677568377325	0.208710021191242	0.556890191115713
CG11470	0.0	0.609661449781965	1.30528413248232	0.769270538241484	NA
CG11474	270.4472614031097	350.33190475633853	0.374256105684821	0.226273267728095	0.578291180655223
CG11475	24.178132310776267	12.2130130360633	-0.996614542587063	0.281201773798268	0.633944410246519
CG11486	4585.943301056023	3890.077879417085	-0.237260593483237	0.283762012079605	0.637475429785425
CG11498	77.42701989822153	75.66012811115161	-0.030125689119309	0.944277185445477	0.98356989317598
CG11504	232.44595822920868	221.664597106943	-0.0655973260561987	0.846820120266677	0.951428948593137
CG11505	6567.81524783338	5348.384236577025	-0.296245241701444	0.425609351346202	0.753909491518028
CG11523	420.1011647413013	376.85355593031204	-0.154452113437121	0.672539966048598	0.879829322554142
CG11529	72.171126674971	21.7009554800738	-1.72685122279258	0.0581257580027034	0.282251039916414
CG11534	388.13761323593235	449.198046985824	0.208551403555936	0.625414633020595	0.860393235571551
CG11537	1015.461761452626	1062.55949777445	0.0654093635517962	0.811687167176453	0.943059249673731
CG11539	92.3113777973785	92.00710639232355	-0.0039966688329435	0.992360203378928	0.99798350791657
CG11550	0.0	0.0	NA	NA	NA
CG11555	526.5552954827716	598.0810355174575	0.183332072697887	0.542850420523343	0.823078617881335
CG11560	204.576980430091	238.0886443871245	0.219170356875337	0.488190212205993	0.792457068216412
CG11562	298.02203350428164	360.677054416437	0.276211036502624	0.300819941554773	0.652086871652806
CG11563	932.418452885067	912.346061697227	-0.03090971253797	0.928701290602502	0.977068197406335
CG11566	0.0	0.0	NA	NA	NA
CG11570	0.0	0.0	NA	NA	NA
CG11576	324.69794371757666	393.3144150744255	0.277531439785855	0.333481426537243	0.68139043750982
CG11577	651.8695397053664	551.760347886391	-0.239420168797576	0.449942693577954	0.769809128561405
CG11581	0.0	1.5432486106499106	2.64206402722512	0.546062161702943	NA
CG11583	1389.0910173372502	1421.36731070646	0.0331844149126098	0.877132737097643	0.961036430063657
CG11584	0.0	0.64785142217196	1.38496720581544	0.755277060824762	NA
CG11585	0.0	0.0	NA	NA	NA
CG11586	276.10812335827603	278.38565219400596	0.0148516585303035	0.966101919399346	0.990817268452894
CG11588	0.0	0.0	NA	NA	NA
CG11590	227.86392316484967	204.192392748724	-0.155825489911275	0.6266764919631	0.86125415548871
CG11593	1031.6603207663604	1274.354252713485	0.303999791911817	0.277894530185318	0.629768432451083
CG11594	81.7594143417942	309.445019540099	1.91782415615676	0.263764789419302	0.619781763737662
CG11596	920.754547551108	1270.9622357130602	0.464632480490767	0.162573320654994	0.493976455797476
CG11597	49.83722917597074	52.77735064967494	0.0739024429335524	0.92610945390061	0.976583750355072
CG11598	15.59522296334346	25.7981088612505	0.714459799379553	0.392251434372528	0.727853711107832
CG11600	7.985270667946019	18.4057915190869	1.19410775722803	0.408634716072003	0.741360511137863
CG11601	423.36129460099664	367.40173629600497	-0.203506474376836	0.564123071303313	0.835886810872221
CG11608	3.1673600570287532	12.57512871953925	1.93930764940886	0.352253385606736	0.697560169889042
CG1161	1100.0888423172025	868.1605672488555	-0.341231365997011	0.361041053078911	0.704799514529926
CG11617	38.32691993322144	21.77733542485375	-0.811022507531536	0.312748593053745	0.662789503713028
CG11619	193.128643015114	217.819812871675	0.169803607022293	0.768727471392467	0.92259784597497
CG11626	5.732140392065624	3.734348643471785	-0.615383692391907	0.669264058679967	NA
CG11629	2.89074636655036	4.077369340752765	0.506571127557479	0.846084725609333	NA
CG11630	2.7608842006840497	6.383039290744625	1.2151878692443	0.549737004252546	NA
CG11634	0.0	0.609661449781965	1.30528413248232	0.769270538241484	NA
CG11635	2.371297703085123	0.97177713325794	-1.30887145417031	0.670826931100468	NA
CG11638	27.959211825993595	56.24505854064574	0.998185202318679	0.136173934144552	0.450703040274271
CG11652	632.8489034930284	1051.9633570769001	0.731766695282207	0.019581480231999	0.150238820030097
CG11655	252.55959579082665	218.7287926125165	-0.205391593065595	0.601491012798598	0.851763721210883
CG11656	1.7596444761270866	5.01095650162071	1.44991874113368	0.56576283053288	NA
CG11658	690.2192707956293	1367.42260821419	0.984912504636215	0.100149238173378	0.383645766824906
CG11659	15.08484780484436	0.3239257110859805	-5.57255870101361	0.00304691581766837	0.0436485461248531
CG11663	0.0	0.0	NA	NA	NA
CG11664	0.0	0.0	NA	NA	NA
CG11665	1869.9266844743233	2795.096578266625	0.579307892386609	0.0584998515038006	0.283510017385181
CG11666	0.0	0.0	NA	NA	NA
CG11668	0.7038577904508333	4.877291598255725	2.70229324821343	0.456388341086338	NA
CG11670	2.89074636655036	0.3239257110859805	-3.16710718774548	0.434925177287283	NA
CG11671	22.50544993075113	10.879120219329385	-1.03580524981522	0.306801917456707	0.657396360525114
CG11672	0.0	0.0	NA	NA	NA
CG11674	399.5187322514104	799.1855529364235	1.00034820291025	0.0123712164921939	0.111362482313978
CG11679	349.6380206293217	298.4287891462595	-0.227966121513606	0.496576539996072	0.795093748407679
CG11686	197.86740125133633	93.99022873968775	-1.07245714267715	0.0115615850380669	0.106796119613935
CG11693	0.0	0.609661449781965	1.30528413248232	0.769270538241484	NA
CG11694	0.0	0.3239257110859805	0.376537525008433	0.934136406989217	NA
CG11695	192.66831260966237	154.63451516948498	-0.316450933576336	0.422162342566219	0.752702139141941
CG11696	452.3122031020207	392.85682445997395	-0.201769440438368	0.497289128729505	0.795093748407679
CG11697	5.706177528353696	3.4677078909708	-0.733206639467122	0.688916195335265	NA
CG11698	0.0	0.91449217467295	1.88896676350255	0.668385009972474	NA
CG11699	473.08242258099335	357.2638752671355	-0.404462501563043	0.200969402389998	0.546785747932419
CG11700	549.133319112206	484.672291936119	-0.180025083124539	0.533801136619454	0.81642517721868
CG11703	0.0	0.97177713325794	1.9711394364936	0.654546505538498	NA
CG11710	639.101093370295	614.6012467828425	-0.055255439363118	0.879181530912923	0.962363697135397
CG11714	0.0	0.0	NA	NA	NA
CG1172	499.980029778037	529.8139138026979	0.0853383017201977	0.827574511851707	0.947802366967357
CG11722	144.1816410564879	153.986663747313	0.0963012513072759	0.834072548054651	0.949084773401657
CG11723	439.39792999041305	417.5904374739075	-0.0743046484857746	0.824998798225757	0.947319626505921
CG11726	0.0	0.3239257110859805	0.376537525008433	0.934136406989217	NA
CG11737	804.8813233870604	1620.2372242186	1.00817881866992	0.00429729465047196	0.0561604954170776
CG11739	406.77470989377	603.283630935257	0.566212235818064	0.0772262855496453	0.333010311863275
CG11741	0.0	0.0	NA	NA	NA
CG11752	366.51224872756467	178.3165258342355	-1.03703843394595	0.0158652117601162	0.130790754364761
CG11753	161.4482887486698	165.38203764813647	0.0312073456099489	0.950303629191555	0.985362449797318
CG11755	133.598667763364	152.635054052842	0.189448929283465	0.602109177914856	0.851763721210883
CG11756	9.199202192010153	6.878130823356605	-0.407881099761293	0.814135779719606	0.943878347096145
CG11760	0.0	5.9254486762936605	4.58225765840903	0.144576500290791	NA
CG11768	0.0	0.0	NA	NA	NA
CG11771	1277.7615268385834	1194.5389972083399	-0.0967611511395817	0.715471657405171	0.898509392003604
CG11777	253.30136476123002	256.417366907202	0.0195440593897475	0.960532276324835	0.988142563559556
CG11779	1039.040316025522	839.1797971811015	-0.307317179085928	0.236513885970175	0.590979773081309
CG11781	447.59144833381	313.11932700807	-0.515167279245738	0.0630078777752758	0.296975850636915
CG11786	7.3736174409879665	6.24937438737964	-0.250550869667091	0.880325337322868	0.963149279580062
CG11788	96.77972716918661	68.914973136931	-0.491095520509109	0.270929048163073	0.624380379935531
CG11790	1434.4131263954398	911.8100239753095	-0.653134181639445	0.041126669589464	0.231307128152234
CG11791	2070.7252708392834	2834.9346173505946	0.452587900098618	0.195638275473739	0.540894595890105
CG11796	2.4635022665779203	0.3239257110859805	-2.95998451132815	0.478120123862165	NA
CG11802	118.18059307569133	152.882599819148	0.367774504333267	0.30985324860128	0.660264070147102
CG11807	786.5894272741433	874.67382617182	0.154053671784734	0.595087528034578	0.850887579885735
CG11808	207.52817102656635	145.9273999967825	-0.504717377374281	0.194426572413078	0.539713933432609
CG11811	6543.943951871143	1267.227887069595	-2.36843649581042	0.117179518311246	0.415791736798926
CG11815	0.0	0.0	NA	NA	NA
CG11816	0.0	0.0	NA	NA	NA
CG11825	150.15868265277066	240.3335841073865	0.681817092240253	0.126660018070297	0.433646000298274
CG11828	58.209211530241134	46.7380211104403	-0.321154014673702	0.665961271829463	0.877284842972754
CG11835	9.246234724235618	11.546066627696325	0.324186232890524	0.84965795086233	0.952232804191491
CG11836	339.1406936970977	308.776695023274	-0.133683660771095	0.643057954046361	0.867489952709177
CG11837	556.5189470577869	563.4196063227995	0.018988262141402	0.946200188633054	0.98419433541145
CG11839	149.44347939585066	231.41986935768352	0.630097589143102	0.042704373291844	0.237334949382731
CG11841	7.909955463199007	10.34583871432741	0.363046862340376	0.822612268293316	0.947014766030926
CG11842	16.54423553559077	7.583267204113555	-1.11131525095866	0.31780390084785	0.66742529642679
CG11843	4.59609745913727	6.268469373574639	0.45812006060783	0.796501175349243	NA
CG11851	716.8654685094693	813.9913497696325	0.183771529851604	0.464179852846835	0.779511644421954
CG11852	3.8712178474796004	3.734348643471785	-0.0801815206409493	0.975103616504382	NA
CG11854	8.169679794931627	11.698826517256295	0.497044639237201	0.748199863175143	0.911972832832899
CG11857	3452.6625653988867	2126.318534408035	-0.699087056345657	0.0455652619984977	0.246357294746713
CG11858	503.71181503623467	411.512228908054	-0.289994434182922	0.343473223871771	0.69183751483848
CG11865	0.0	0.0	NA	NA	NA
CG11873	3718.279417876267	2703.466548218595	-0.459727260939994	0.208179836275422	0.556581995554723
CG11876	1555.1313005327866	747.0689472070551	-1.05700341693466	0.00283774584287772	0.0415145760295392
CG11878	9.40231333139295	4.153749285532755	-1.17012325723085	0.401748099841929	0.735362382820745
CG11880	3787.189544186993	5191.007132469969	0.454570233664182	0.148244536894432	0.471782536953571
CG11882	275.4106822565337	534.9817645192525	0.954750253521707	0.153321860623307	0.480141853801955
CG11883	996.6331718646651	1079.3661338327602	0.114033226734242	0.704244667942609	0.893952201358731
CG11885	376.8307582723863	392.58811654478654	0.0604064672627785	0.839967662668186	0.950507465060163
CG11889	0.0	0.0	NA	NA	NA
CG11891	0.0	0.0	NA	NA	NA
CG11892	928.6233294204548	84.40612231047311	-3.45928603893687	3.28470083844263e-09	5.24498506401908e-07
CG11893	6.632102048163634	9.545916456824445	0.502685254966481	0.759649463604229	0.918631404426346
CG11897	3187.576488868977	6024.345241983855	0.918137258672947	0.020285987641291	0.152753785629086
CG11898	56.348241138348406	70.82102648528586	0.325435525358543	0.489342851376298	0.792457106146103
CG11899	621.618315856193	745.9308276318741	0.262617097618829	0.291512980803436	0.644531586244109
CG11902	659.937995411518	812.1814604064821	0.298207182524944	0.302431237978713	0.653582593901762
CG11905	20.285892642089834	7.33572143780755	-1.47576421146204	0.352191212163695	0.697560169889042
CG11906	245.71595979539202	343.566965741694	0.481915185037945	0.0867040435812153	0.354458467494273
CG11911	0.0	2.19110003282187	3.14688377821978	0.470679326355963	NA
CG11912	1.5941909391178	0.304830724890983	-2.33615755039995	0.601439808971734	NA
CG11920	544.3576161590404	714.7568903686106	0.391166710604982	0.216960691363614	0.568395245890035
CG11927	451.49588989631667	410.0419149710395	-0.138705847848758	0.641761550801437	0.867489952709177
CG11929	31.321613591046432	13.14660019693125	-1.24980736731291	0.269112821392942	0.622769172414054
CG11951	13.448613223312861	15.4522701469231	0.183164164331163	0.905376637827367	0.971012419712527
CG11961	412.8009602891677	686.2923739823505	0.733060751516454	0.0277679152391399	0.183666864082297
CG11964	765.3215273446036	642.643606310126	-0.251511979213753	0.382882157999211	0.721320753365979
CG11966	18.618452729455566	24.6162868798476	0.393305074462295	0.778541320173176	0.92790807773543
CG11970	1050.4211561175673	1236.9739544148351	0.235405802672683	0.38813252976404	0.725023434233242
CG11975	417.16550605343497	430.947082518984	0.0450726688711764	0.875561811737791	0.960128903605171
CG11977	1.7596444761270866	1.943554266515885	0.114901346632661	0.976778240385771	NA
CG11980	1709.2776911398398	1486.203536394185	-0.201334545143668	0.383879474710992	0.721320753365979
CG11982	562.9682366656353	477.1872558798965	-0.237190398926951	0.467879025319113	0.781394540744045
CG11983	91.83230366459573	40.64071755839165	-1.17848849575717	0.258693729722465	0.614813705542155
CG11984	1707.6079580241833	2048.16040837649	0.261966952433586	0.232375007383795	0.587354521351562
CG11985	519.058463640751	510.66203971354855	-0.022261521774318	0.93998959961741	0.981766603572139
CG11986	474.6309862853286	375.36690322401796	-0.336612933403986	0.380993779764003	0.720232382599197
CG11997	0.0	0.0	NA	NA	NA
CG11999	766.8011467618945	269.7549169660835	-1.50591979298667	0.000511719342369117	0.0113821788346748
CG12003	0.35192889522541665	2.55321571629785	2.40465324535388	0.468423714009081	NA
CG12004	2584.0980532206136	2425.5711641775997	-0.0914553966375392	0.692584438467142	0.890826425729562
CG12006	1379.7613877402	1127.484307850855	-0.290968752447532	0.221831284342885	0.573806765121338
CG12007	629.953205847264	762.9141419455416	0.275074799545409	0.321336634673125	0.669942514094766
CG12009	0.48179106109172665	1.56234359684491	1.69748403416076	0.640545192529056	NA
CG12010	285.2294950431656	253.3874655902585	-0.170825833197947	0.630491144360268	0.863045249618615
CG12011	11.81126863685157	8.574139323566495	-0.449349676233704	0.684308573843445	0.88561105846631
CG12012	219.56968175545833	381.085063269083	0.791875625521836	0.0299253777845825	0.192486431856926
CG12014	20.5835281537751	51.939238419782	1.31435463322724	0.0944330464240603	0.370953664703401
CG12016	3.816670886360303	2.743476524018845	-0.479469204156245	0.857251747390294	NA
CG12017	0.0	0.0	NA	NA	NA
CG12018	260.25902138036196	230.5046881287815	-0.175004412415025	0.563642134093824	0.835566947532238
CG12020	45.651185033174336	25.9883696689715	-0.812020658474286	0.188493844355683	0.533976536459915
CG12024	294.7281932478193	465.279762622953	0.658637275380934	0.0208347665316255	0.155202828872095
CG12025	1179.7063098061399	1181.705496387045	0.00223523573130749	0.992860531185822	0.998071384396438
CG12034	708.2797902820847	684.1210579899525	-0.0502492932159411	0.852964991936743	0.95292902480036
CG12035	0.0	0.6287564359769635	1.34557557205584	0.762187908052914	NA
CG12038	7.6284007302155175	6.211184414989645	-0.287186537237783	0.866578467669603	0.956667850475686
CG12054	2103.27410201545	2443.0325422003752	0.215835311766033	0.433995653601897	0.759839474172697
CG12056	209.7503017016163	128.7614044719125	-0.70017774580382	0.130894203880807	0.44084622296945
CG12057	0.0	0.609661449781965	1.30528413248232	0.769270538241484	NA
CG12061	12.118279078388772	6.878130823356605	-0.81477816186508	0.497008635212534	0.795093748407679
CG12065	2352.6417074333963	5237.03627993871	1.15407111739807	0.0726058029076741	0.3209238544761
CG12069	14.801781843095265	15.642530954644101	0.0670052366976142	0.963577475483232	0.989579260848676
CG12071	305.618621949286	331.94589727767595	0.117240814696299	0.742050855234003	0.910308319197508
CG12075	1068.783165962941	401.4371652716015	-1.41249180157921	0.00376949600747544	0.0508316782337919
CG12078	0.0	0.97177713325794	1.9711394364936	0.654546505538498	NA
CG1208	30.448074106511868	4.420390038033744	-2.77960219289608	0.108893485277046	0.399391956815776
CG12081	447.8373118967006	468.023928201201	0.0615102993179563	0.845521354923244	0.951428948593137
CG12084	1081.0847448832183	1434.6680489014152	0.4075005492774	0.168283431488435	0.503341680707021
CG12091	952.4251919565517	952.0088006342995	-0.000597252827650207	0.997854237049828	0.999497034069957
CG12093	751.1809875099012	693.9773176055	-0.114649733378241	0.709055653957438	0.895781437508462
CG12096	652.4261969000623	535.218285417895	-0.285050483613684	0.389668531005657	0.726006427395873
CG12099	2876.71268488318	2915.249589235735	0.0191833680645777	0.936491541316377	0.980421546867144
CG12104	344.5703053822797	353.0924091038655	0.0364179778991161	0.896004552461867	0.968400120385507
CG12105	44.880831965363505	19.471665474861872	-1.20009878341562	0.166151781731515	0.499590675036361
CG12106	135.25415935975732	144.36574545416698	0.0916475225696888	0.794962671815126	0.934061832745239
CG12107	1322.5363536319235	945.363254916428	-0.483734808603756	0.218324909452118	0.570550644162585
CG12111	0.0	3.10559220749482	3.65034105117577	0.36709038133571	NA
CG12112	339.54525299650396	1074.7895386340201	1.66015199310617	0.00514386019230604	0.0637020224542408
CG12115	0.0	0.0	NA	NA	NA
CG12116	1029.7758390403123	680.7865244803345	-0.597292630567824	0.716066599680638	0.898719914776285
CG12118	308.33938519686666	341.62203336672053	0.147574860804798	0.608899723010679	0.854637816644333
CG12121	1813.9616528317665	1617.10013404879	-0.165187408957048	0.565490447003999	0.836160276578482
CG12123	244.30251096102268	237.1932471986465	-0.0460158362181069	0.944769865428517	0.98356989317598
CG12126	0.0	0.0	NA	NA	NA
CG12128	769.5056733758443	800.9756582591505	0.057927457487367	0.799091188948441	0.935619171278824
CG12129	580.852708904578	613.5871453518205	0.0790739781456605	0.781672484524481	0.929505461880514
CG1213	6.3347201140575	8.059263750530565	0.325816888971382	0.887607136490914	0.965413395097455
CG12133	1.0557866856762501	1.943554266515885	0.840905703826297	0.841954223983953	NA
CG12134	542.6319356572593	558.7544267353755	0.0416828923737918	0.891012215662679	0.966594450672476
CG12147	0.0	0.0	NA	NA	NA
CG12155	618.0740578771253	563.9945230713361	-0.131561909171454	0.701628444109186	0.89280662196676
CG12158	0.7038577904508333	0.304830724890983	-1.25464025354551	0.782421603300291	NA
CG12159	261.97712936923404	564.715998221372	1.1060137900325	5.91531238315012e-05	0.00224110168420959
CG12163	4845.636748131757	4628.594737035895	-0.0660213225546482	0.839204077694112	0.950283312414079
CG12164	0.0	0.952682147062943	1.94420141998357	0.659071403800253	NA
CG12170	262.66656525600536	147.7386674683915	-0.827241586104356	0.027264733474826	0.18215292894972
CG12171	401.67913164342434	272.784818283027	-0.556494831522951	0.316697691870392	0.666471544778443
CG12173	389.7211032732873	374.7183627476175	-0.0585874396992074	0.840425396777676	0.950575918923928
CG12177	457.1550369204803	347.4200186277095	-0.398034448387394	0.4831865310749	0.789884351336761
CG12179	383.9343578360867	624.848854349279	0.702924165830313	0.0157376586059503	0.130428367757487
CG1218	619.2384559076368	618.712671770611	8.69499673223334e-05	0.999760026627031	0.999876066479718
CG12182	205.6150691769773	211.60380507708248	0.0438718348541401	0.909234495785265	0.972120180715363
CG12184	6.901153462441516	15.184940340193144	1.15661628463129	0.487416573342512	0.792189261276709
CG12194	69.90493397358352	73.96480866517075	0.0779045088462601	0.925200962677475	0.976583750355072
CG12200	35.97019178007243	70.2113650355039	0.961211983698725	0.201766997852348	0.547550257997994
CG12204	95.1140520628972	96.54275540175641	0.0270704361360536	0.951289150448151	0.985890148605734
CG12206	1186.1494069009339	379.596343400102	-1.64291000512424	0.000334323310725253	0.00827250239911793
CG12207	1166.0822570575199	1641.38511415325	0.492353893554523	0.0878778635669198	0.357776127005177
CG12209	32.533478883880036	38.0302168835088	0.230973212697317	0.74720909710379	0.911554563094446
CG12213	1170.5912509549373	933.053388840932	-0.32647470786407	0.325194905083923	0.67240243862808
CG12219	235.53956215756298	266.9534664292505	0.183761198352597	0.577761203686966	0.841528406588804
CG12224	119.96650184041619	118.073234114533	-0.028325711260923	0.949876988338182	0.985315183069082
CG12229	0.0	2.495930757712855	3.33490273993281	0.444147421921215	NA
CG12231	0.0	0.304830724890983	0.332305500826944	0.941902006605117	NA
CG12236	973.3282612444583	917.2008130381425	-0.0855511778876212	0.768437819382118	0.922536343604809
CG12237	372.570556777079	394.78335090298197	0.0833633525828262	0.747027906248753	0.911554563094446
CG12239	7.474895509446934	0.91449217467295	-3.01514442285806	0.226749768182185	NA
CG12241	950.5037335917647	834.3222896232694	-0.187420501648899	0.513859245198672	0.803466651959998
CG12253	133.88853526857633	208.822827634903	0.639470409862397	0.0666572414035556	0.305871449873727
CG12256	15.023848572454368	29.4942675323323	0.957569773352478	0.48378830897317	0.790061910797464
CG12259	411.8051004415493	287.5878588993205	-0.515869381855082	0.098688288205588	0.380728446441774
CG12262	3567.5089922545703	3445.4626291180602	-0.0499899541737883	0.84434309257408	0.951428948593137
CG12263	915.8114328373263	708.512339360834	-0.369244278999695	0.177246013416767	0.516119233324781
CG12264	515.3988132468037	504.35469131335503	-0.0304866085129303	0.915898203202581	0.973600731318016
CG12267	540.203274265796	541.7575298693446	0.00291799657123792	0.992104751574188	0.99798350791657
CG12268	24.701967014281703	14.213852261164199	-0.791045445752318	0.308652745637355	0.659255423899779
CG1227	443.44734190210494	379.252633648592	-0.223383274907203	0.554852532940118	0.829650212835511
CG12278	0.0	0.0	NA	NA	NA
CG12279	226.36562018054335	195.3891135908175	-0.213330371184144	0.500037597727907	0.796287740307889
CG12288	1298.9647715182998	1607.6455581975702	0.308276543931198	0.31588046884309	0.665671480636613
CG12289	0.0	0.0	NA	NA	NA
CG12290	1855.09132066724	3998.1498721552452	1.10725715815866	0.0178716967804817	0.141971551306085
CG12299	527.2753571204261	626.9812913150574	0.250191259782538	0.485168300680797	0.790500273147681
CG12301	1037.1806989794275	1124.957766717275	0.118119397323464	0.654720705101655	0.873128216111505
CG12307	0.0	0.0	NA	NA	NA
CG12309	3.3725374276421003	0.0	-4.86314935499178	0.27329612430989	NA
CG1231	14.838884443003865	10.04100798943641	-0.548754669974951	0.656323802389811	0.874337595069271
CG12310	0.0	0.0	NA	NA	NA
CG12316	687.4138366269298	1162.47517519043	0.757344902874334	0.00238641458486691	0.0367416832951813
CG12320	147.64773639342266	134.4393073819005	-0.13400845599194	0.7273189568575	0.903523013491816
CG12321	523.6182568433147	485.85549202597997	-0.106567748111973	0.688204477148707	0.88798639061241
CG12325	1299.7936898696998	1249.3567551639649	-0.0567607173439719	0.794157394299494	0.93385885148519
CG1233	869.6582496342684	1001.3458070299446	0.202807234089645	0.43079410073932	0.7578812022282
CG12333	310.5102408415714	402.23157509527255	0.371273287221661	0.192267752110414	0.537423328216664
CG12338	181.59458478613965	146.3092997206825	-0.309695454003038	0.391397352051502	0.727284013335332
CG1234	1467.65371655516	1621.27780170012	0.143444023363866	0.506144666203058	0.798402938958412
CG12341	401.205148227439	614.6182746063505	0.612941001758656	0.0433670269891981	0.239096567243751
CG12343	440.7037646530841	500.49219020034997	0.183283124328194	0.627587664424159	0.861350744843295
CG12344	37.361826582272364	40.44907864221265	0.109333930415377	0.926011156824974	0.976583750355072
CG12347	0.0	0.0	NA	NA	NA
CG12355	116.89814789034347	131.1025081773787	0.162771002727587	0.817673468114439	0.945424590927345
CG1236	800.6288195494644	571.0615365939559	-0.486347859881192	0.119342171287262	0.419540419213116
CG12362	1.9271642443669066	0.64785142217196	-1.57074715081455	0.714135745885216	NA
CG12374	110.83315036106013	17.185779565294	-2.69269639461537	0.0309712352252745	0.19628399873469
CG12375	417.5829739997196	784.5748402905381	0.907269207586272	0.0077134527048391	0.0814084095164805
CG12376	0.0	0.0	NA	NA	NA
CG12379	77.65614174862306	58.39727954684865	-0.412614423274825	0.445566615772457	0.767597639314966
CG12384	1787.5426167166834	797.276054316924	-1.16439342866161	0.00172476887618006	0.0290069666444396
CG1239	139.2396657495599	293.971587244294	1.07392586369924	0.017543720092954	0.140011340217148
CG12391	1115.4024074123747	1322.541425612055	0.246623618978566	0.436320070047579	0.761792451806568
CG12393	340.796328835411	323.27490491467654	-0.0765813147120706	0.823645071604896	0.947319626505921
CG12395	6.76196421402996	23.75907966375965	1.78695812872806	0.182289656382285	0.524165114251313
CG12398	6176.890840481704	1444.1900469924399	-2.09644456360645	2.39853397556422e-07	2.22253996878913e-05
CG12402	8.984697738851567	19.1484288180049	1.06837613764282	0.490595234972854	0.792971794862358
CG12404	759.2598099547677	441.5356436200145	-0.780904453251935	0.0104161097751574	0.0997535401893079
CG12413	332.445019030155	278.08151052334404	-0.256643293183424	0.34849038066448	0.695076115743911
CG12420	1.0557866856762501	1.5814385830399051	0.523208077468729	0.87477220933667	NA
CG12426	0.0	1.21932289956393	2.30332972291386	0.599762371259789	NA
CG12428	722.3965701257549	1463.343299190045	1.01707129131165	0.000329856535088996	0.0082012166885228
CG12438	0.0	0.0	NA	NA	NA
CG12439	0.0	0.0	NA	NA	NA
CG12446	8.57328084000177	3.79163360205678	-1.17440666767072	0.354408722463997	0.699264402725986
CG12448	0.0	0.0	NA	NA	NA
CG1246	70.28882893264891	108.3936527543435	0.616808702933176	0.425805115328992	0.754127107508179
CG12464	0.0	0.0	NA	NA	NA
CG12470	0.0	0.952682147062943	1.94420141998357	0.659071403800253	NA
CG12477	0.7038577904508333	30.046644023529247	5.19714957971087	0.00119587591768676	0.0218532590399896
CG12479	0.0	0.0	NA	NA	NA
CG12480	1.4077155809016701	0.609661449781965	-1.23153164103342	0.777945196980375	NA
CG12481	0.0	0.0	NA	NA	NA
CG12483	16.230265667624668	4.744315749119725	-1.77849443250202	0.273602229783919	0.626557494562817
CG12484	11.9795969851354	80.23258898451635	2.71777132335337	0.0314889373447986	0.198470492966028
CG12490	5.299701672009	1.905364294125885	-1.47167001463294	0.58688080133229	NA
CG12491	0.0	0.0	NA	NA	NA
CG12493	29.423287021665967	28.92210700071135	-0.0274322810465047	0.975944224655393	0.993737169804092
CG12496	0.0	0.304830724890983	0.332305500826944	0.941902006605117	NA
CG12498	4.7825728173534	4.28672513466876	-0.140486043060383	0.958836322818362	NA
CG12499	3675.39230816109	4082.5781376586247	0.151765012793024	0.494277899834469	0.794350624784498
CG12502	0.48179106109172665	0.91449217467295	0.927196760239338	0.833462669575222	NA
CG12506	0.35192889522541665	0.64785142217196	0.42319753834362	0.924123240806121	NA
CG12507	5.4794233340686205	5.068241460205705	-0.105991414697557	0.953428249578288	NA
CG12511	0.0	4.420390038033744	4.15910860458546	0.235925356915701	NA
CG12512	146.44710653139916	195.5998474931915	0.417267932235729	0.562901422540472	0.835566947532238
CG12516	2.1115733713525033	2.915331399773825	0.43839718964691	0.905209048690238	NA
CG12517	460.18619870840365	779.4295298313241	0.758306376740055	0.282369204286039	0.635730230720614
CG12519	0.0	0.609661449781965	1.30528413248232	0.769270538241484	NA
CG12520	3.1813746044999838	4.896386584450726	0.631550844009647	0.772071952127352	NA
CG12521	0.0	0.3239257110859805	0.376537525008433	0.934136406989217	NA
CG12522	1.0627939594118667	0.0	-3.17227522631635	0.481717027841122	NA
CG12523	0.0	0.0	NA	NA	NA
CG12531	3.8543284887338003	8.19292865389552	1.09747729123769	0.636062303543204	NA
CG12535	13.608570715352187	14.232258193130185	0.0783235717062328	0.940240464879534	0.981870252610202
CG12538	0.0	0.0	NA	NA	NA
CG12539	3.3725374276421003	0.0	-4.86314935499178	0.27329612430989	NA
CG12540	1.4077155809016701	0.0	-3.6344300497577	0.417367948842791	NA
CG12541	48.4689360037873	34.06672840569705	-0.50637864825495	0.357979973875568	0.702438606516952
CG12546	0.0	0.0	NA	NA	NA
CG12547	1669.5675584442067	2003.324995343255	0.262742587143446	0.374882562819491	0.714598294736822
CG12560	321.31393365062667	661.0507759376706	1.0380519935296	0.0525826513697336	0.266599197606448
CG12567	1830.0180441825298	2749.30228159827	0.587070092343904	0.00437307362218254	0.0568224880329573
CG12576	2487.282233657497	3159.1185020061102	0.344651819667226	0.15691526425476	0.485197857284257
CG12581	2431.7971195904934	903.224369262066	-1.42854379129277	0.00723431010034579	0.0785146583083699
CG12589	0.0	0.609661449781965	1.30528413248232	0.769270538241484	NA
CG12590	0.9635821221834533	1.86717432173589	0.974360192788247	0.767527233024262	NA
CG12592	94.55785007171579	178.62411277604252	0.913944471736528	0.225703897678442	0.577950419202561
CG12594	0.0	0.0	NA	NA	NA
CG12605	6.757023171524871	2.495930757712855	-1.43336252230229	0.378540893263463	NA
CG12607	0.0	0.0	NA	NA	NA
CG12608	1283.7736137320467	1137.8963892287402	-0.174070485764149	0.554507947236409	0.82948672125573
CG12609	0.0	0.0	NA	NA	NA
CG12617	0.0	0.0	NA	NA	NA
CG12620	0.0	0.0	NA	NA	NA
CG12637	0.0	0.0	NA	NA	NA
CG12640	0.0	0.3239257110859805	0.376537525008433	0.934136406989217	NA
CG12643	99.50955981739713	236.2200919569305	1.24250764862712	0.152541625127994	0.478973293472629
CG12645	11.88451761036807	6.95451076813659	-0.766408330608771	0.463577691060694	0.778907755450297
CG1265	132.81439584269506	343.0691179921665	1.36595993476171	0.0253025132478349	0.174005249017524
CG12655	16.830477733500228	57.42688052204865	1.75671247404997	0.017423562980759	0.139482903955101
CG12659	183.99602566270468	194.4357423895255	0.0820921364700181	0.81804706868684	0.945424590927345
CG12661	1.0557866856762501	3.0674022351048253	1.47342350804584	0.630952675658865	NA
CG12662	11.525327863827938	4.648840818144735	-1.30630634070666	0.477562711658709	0.786408394632388
CG12672	0.0	0.3239257110859805	0.376537525008433	0.934136406989217	NA
CG12674	25.517539960666568	122.512030084533	2.2399482583719	0.00147116101270959	0.0256597274105486
CG12679	1.9271642443669066	0.0	-4.05338221013364	0.363754815303715	NA
CG12680	0.0	0.0	NA	NA	NA
CG12682	0.0	0.0	NA	NA	NA
CG12684	0.9635821221834533	0.64785142217196	-0.56543714790176	0.897703555125364	NA
CG12688	1.7973020785005964	3.505897863360795	0.964654935299734	0.671429250105616	NA
CG12689	6.485350523551566	16.671593046487	1.36767478319098	0.403795832867038	0.737391340940151
CG12691	0.0	0.0	NA	NA	NA
CG12692	3.4717492648704997	1.8289843493459	-0.909864601778686	0.748466383087226	NA
CG12693	0.0	0.0	NA	NA	NA
CG12698	37.9373334356225	27.3604524580954	-0.468716456762787	0.506426005288417	0.798591884844961
CG12699	0.35192889522541665	1.600533569234903	1.73050442148819	0.649053308522648	NA
CG12702	158.49340452416666	141.755244779284	-0.162010757400495	0.724780709278685	0.902769044279112
CG12708	5.18178782238338	30.73268541809125	2.55605038316997	0.0138880361579967	0.120264871416456
CG1271	202.84225302913396	342.256302236529	0.750678760326569	0.280875851349346	0.633637666207209
CG12713	289.4278887260387	367.952045624515	0.347683885834162	0.374759124949333	0.714494678221373
CG12715	0.0	0.0	NA	NA	NA
CG12716	473.75455557217293	708.1230585726314	0.579475825156655	0.66427702135945	0.876918146315749
CG12717	362.26772678712365	507.9942540800805	0.488887030726196	0.0616594417048513	0.292274796312226
CG12721	119.12244049123719	272.26787554730447	1.19051695307299	0.106507763680287	0.393642674251484
CG12723	2.85308876417685	3.96279942358278	0.462968824494515	0.863730610048464	NA
CG12725	1.7596444761270866	4.477674996618735	1.29181372281685	0.627815672606375	NA
CG12728	372.55836101563165	551.320474149677	0.562844721563566	0.216655271436324	0.568160402216379
CG12729	0.0	0.0	NA	NA	NA
CG1273	9.421015343790149	13.4896208942122	0.538319838950425	0.679409122802788	0.883298310737708
CG12730	350.5725258399853	391.2958589715875	0.159674851127445	0.791622532859594	0.93318348043843
CG12736	523.4866777184108	376.79489286326896	-0.473985625865209	0.068379724946798	0.31047036660436
CG12744	661.898487274198	434.922775440701	-0.604968824646353	0.137969694885793	0.454320456607373
CG12746	379.77862498644464	437.42146241532953	0.205046946246389	0.503343209405535	0.797520495233678
CG1275	901.3230863331497	692.600411436773	-0.379500100850545	0.279067172226927	0.631595571628688
CG12766	17.843412196718766	20.4059416899588	0.189491407173753	0.823440192580988	0.947319626505921
CG12768	19.775771061169866	79.62223848050544	1.99136222206719	0.00580832590115653	0.0682144969468837
CG12769	734.9036250936628	678.5857776883065	-0.113943173454836	0.765696911499308	0.92131370777964
CG12772	279.42207705695097	424.4296892706455	0.604003165108666	0.0469440776672185	0.249636295790253
CG12773	1435.5588669246233	951.4428415907396	-0.592672099377779	0.0997525556179494	0.383546722214294
CG12780	7.404521347205001	0.0	-6.00839058930748	0.0462618949512932	NA
CG12782	7.281412877495186	12.345988885199294	0.756483401669069	0.642292867795626	0.867489952709177
CG12783	15.25004776427457	5.430357143681675	-1.49156333568903	0.198516682894326	0.544342007204668
CG12784	0.0	1.2384178857589305	2.32461163252009	0.596320958177123	NA
CG12788	0.0	0.0	NA	NA	NA
CG12795	613.3436848381933	684.601877915972	0.157916771708001	0.509431079729805	0.800766817271333
CG12811	351.3597122105616	435.405662529408	0.306935951508291	0.507726265094475	0.799910549866284
CG12814	549.7800790566024	291.932558046803	-0.914740571287801	0.135132176948138	0.448402046972156
CG12817	1.44537318327518	0.0	-3.63651776262877	0.417089458044239	NA
CG12818	152.65726913533334	160.064183258938	0.0718130765176439	0.853313940713859	0.953010051701052
CG12822	360.24362266703133	332.7423742640335	-0.112947247516889	0.726499597990408	0.903148967794018
CG12824	1.0557866856762501	5.0873364464007	2.17993162102418	0.398867080733844	NA
CG12825	31.74205614755567	35.9345917816619	0.19053305696268	0.842913332391146	0.951255056947259
CG12826	11.469221826636334	15.0710594772521	0.385788332137082	0.794382237457838	0.933882187090977
CG12828	0.0	0.0	NA	NA	NA
CG12831	0.0	0.0	NA	NA	NA
CG12836	0.35192889522541665	0.0	-2.05938332249859	0.651692607716397	NA
CG12848	317.33516458789967	282.8244481640055	-0.163567630637473	0.627997901119588	0.861570803989905
CG12849	1.7596444761270866	0.64785142217196	-1.46862417596166	0.735201603122417	NA
CG12851	185.4914018840932	266.000784282188	0.518545385872587	0.318713654213532	0.66805143688635
CG12853	0.0	0.0	NA	NA	NA
CG12857	15.651329000535071	10.74614437019336	-0.540204053877428	0.702632657145006	0.892984767603599
CG12860	0.0	0.0	NA	NA	NA
CG12861	0.0	0.0	NA	NA	NA
CG12862	0.0	0.0	NA	NA	NA
CG12863	156.65113614467134	189.8830655565855	0.277778389464868	0.460674618889402	0.776967717610767
CG12866	0.0	0.3239257110859805	0.376537525008433	0.934136406989217	NA
CG12868	172.48950574259632	201.1065845816535	0.216819705896443	0.609982005684925	0.854996297276134
CG12869	9.617372787016453	14.80441872475115	0.621189750248406	0.574970102690389	0.840910035651399
CG1287	48.7154543680927	45.0611075964254	-0.123444832177402	0.853081246092399	0.952955970227205
CG12877	610.1583151807797	765.5989554025175	0.328378024413762	0.250342165431093	0.604918688049025
CG1288	1.44537318327518	0.0	-3.63651776262877	0.417089458044239	NA
CG12880	375.8762222812804	2723.765301055685	2.85708052406496	1.82534128867554e-06	0.00011949053765045
CG12883	148.332902408185	253.0812567569095	0.768179395152801	0.148446270852878	0.471827433541057
CG12885	0.0	0.0	NA	NA	NA
CG12895	220.0163305165497	228.3524671225785	0.0548395910929319	0.851874108295488	0.952766417211805
CG12896	57.682152743268695	75.66012811115161	0.398856307929083	0.439037466131212	0.763072930303575
CG12898	10.117612282926267	0.0	-6.44980956081095	0.084193688358294	0.349285620280915
CG12902	0.0	0.0	NA	NA	NA
CG12909	853.591402750648	817.702469101536	-0.0608810372451616	0.822620704422757	0.947014766030926
CG1291	868.5670752796847	465.240883596334	-0.899632856796643	0.0212202217755853	0.156754422265839
CG12910	3.5403107734610164	0.3239257110859805	-3.45574114027381	0.277460569516645	NA
CG12911	3.1673600570287532	0.0	-4.7893446322586	0.28082207696223	NA
CG12912	0.0	0.0	NA	NA	NA
CG12913	2.1115733713525033	1.524153624454915	-0.49128182003855	0.900390777212379	NA
CG12914	1.44537318327518	0.0	-3.63651776262877	0.417089458044239	NA
CG12917	20.476500462767053	26.674411063533448	0.389656450271123	0.666630292326955	0.877825933598327
CG12920	6.020448821205613	6.040018593463645	-0.0222890296880263	0.990158174430006	0.996943701369311
CG12923	4.03873761571941	1.5432486106499106	-1.40003166586917	0.525190125246602	NA
CG12926	94.58795563459778	191.6213983545585	1.01189591198113	0.144192364046435	0.464391384561584
CG12929	115.67913178185431	98.94252217426535	-0.224187998864487	0.583096839193754	0.844994688775346
CG12934	21.13307214341332	12.612629637700286	-0.733714124051718	0.522552728153983	0.809217377945298
CG12935	223.17592256710532	257.711691643088	0.208437415607869	0.535708933569897	0.817494745020656
CG12942	414.7284157217114	713.8649384512776	0.783865561608977	0.001112508396601	0.0206583022370631
CG12945	850.1291069730631	1132.676765987435	0.413763398747806	0.171956206340747	0.508300383590266
CG12947	113.32376721121393	104.9634457815341	-0.116524591001947	0.832412669913497	0.948945246729756
CG12948	472.98376574622966	438.242546821715	-0.110012542081143	0.703850792098269	0.893571712614754
CG12950	11.877256759053353	16.728878005071998	0.495934986470213	0.754354605119474	0.915123167046668
CG12951	1.7596444761270866	4.05827435455777	1.1504086621485	0.663598366240422	NA
CG12963	30.3156864015635	11.298520861390351	-1.41964004860436	0.116695848819788	0.415628500118135
CG12964	1.0627939594118667	0.304830724890983	-1.74235999373722	0.699030058064057	NA
CG12970	7.012060038331516	9.983723030851415	0.537256659060947	0.69940537644206	0.892403533472705
CG12971	34.805516902430035	9.08832584237347	-1.92663808623268	0.0363618892679782	0.215278203033027
CG12974	30.443688066471676	7.31662645161258	-2.05387171853708	0.0936618481702654	0.369439611717641
CG12975	319.78929192462533	361.549911347575	0.179586692022507	0.60740012359035	0.854391333917448
CG12983	0.0	3.3913279461908052	3.77754344597416	0.341248728941864	NA
CG12984	8.948852790129486	14.994679532472151	0.738150279577916	0.618254626791376	0.857760912797211
CG12985	0.0	2.819856468798835	3.51079636304493	0.400753622948728	NA
CG12986	0.0	0.3239257110859805	0.376537525008433	0.934136406989217	NA
CG1299	40.93672465326887	134.746205269478	1.71531610025442	0.429516104783316	0.757069712299563
CG12990	11.152630724974765	15.890765775179073	0.496625040310161	0.738218189142676	0.90886688850169
CG12991	735.7396374366348	1316.113504338845	0.837722737210773	0.175122781448445	0.512822525347987
CG12992	79.47769996850643	184.3204216179965	1.20580494604878	0.186436041550726	0.531079124391304
CG12994	0.0	0.64785142217196	1.38496720581544	0.755277060824762	NA
CG12995	0.0	0.0	NA	NA	NA
CG12998	0.0	1.5814385830399051	2.67595311157327	0.540821279082523	NA
CG13000	8.764443663143885	7.14477157585759	-0.29100033021007	0.872476133980596	0.958461514848118
CG13001	205.30216146663432	230.8872769069105	0.168655236023677	0.632376542145547	0.863810793334301
CG13002	0.0	2.78166649640884	3.49158000068154	0.412019476953946	NA
CG13003	198.59899284421635	978.9118610101585	2.29733169668001	4.19197494021197e-05	0.00167403848674179
CG13004	157.083321287149	107.3079947581445	-0.549907195779648	0.168555031422201	0.503862627167579
CG13005	233.62232784551335	270.8207909218585	0.214336496645035	0.48194956894757	0.789176729332305
CG13008	1.0557866856762501	1.600533569234903	0.541794911962093	0.873164502478939	NA
CG13010	4.44727970329465	1.600533569234903	-1.47840575444412	0.39515565156657	NA
CG13012	28.811332369822168	5.6779029099876706	-2.3349160728655	0.00986211739520246	0.0964642434796227
CG13014	177.456683180499	167.45650060110148	-0.082901045218207	0.816258277343146	0.944886330448815
CG13016	324.02056618270507	312.528760544483	-0.0528541876983648	0.88159328631707	0.963247218402794
CG13018	99.8535669275205	58.035163863372645	-0.78047309699306	0.223847564318003	0.575934168592314
CG13021	0.0	1.905364294125885	2.94465647649724	0.500170623682415	NA
CG13022	1.7596444761270866	0.3239257110859805	-2.47698102205245	0.578723074550329	NA
CG13023	0.0	0.0	NA	NA	NA
CG13024	10.708497266256567	6.020923607268645	-0.840032856968937	0.60767453705257	0.854544899624028
CG13025	284.816107607699	575.1184328400554	1.01153691358231	0.000361780996215305	0.00872714626291135
CG13026	1.0557866856762501	0.3239257110859805	-1.75343256169127	0.696750478411313	NA
CG13028	7.2320605364601	13.470525908017251	0.881754836766167	0.56345787054078	0.835566947532238
CG13029	22.465472519567967	17.28125449626895	-0.373850492259531	0.613497913709871	0.855988776712417
CG13031	0.0	1.29570284434392	2.38680714623762	0.586313799071008	NA
CG13032	274.4753267991571	60.284237909008496	-2.184958409996	0.0184645199298654	0.14531139526685
CG13033	23.820453793001764	0.6287564359769635	-5.23946735133841	0.00819697643800414	0.0850364366081011
CG13038	2.89074636655036	0.64785142217196	-2.15757429351038	0.582506113196094	NA
CG13039	0.0	0.0	NA	NA	NA
CG1304	0.0	0.0	NA	NA	NA
CG13040	0.0	0.0	NA	NA	NA
CG13041	0.0	0.0	NA	NA	NA
CG13042	1.7596444761270866	4.991861515425715	1.445032472077	0.568645891282443	NA
CG13043	0.0	0.0	NA	NA	NA
CG13044	0.7038577904508333	0.304830724890983	-1.25464025354551	0.782421603300291	NA
CG13045	14.879115431766133	0.9335871608679456	-3.98556866928848	0.119675411378446	0.420163876404366
CG13046	13.559218374317092	18.7290281759439	0.471210014609244	0.700241028394611	0.892494510990199
CG13047	0.0	0.0	NA	NA	NA
CG13048	0.0	0.0	NA	NA	NA
CG13049	0.0	0.3239257110859805	0.376537525008433	0.934136406989217	NA
CG13050	22.219461310420787	0.91449217467295	-4.58884468585086	0.0511565013095419	0.261677395175367
CG13051	0.0	0.0	NA	NA	NA
CG13053	0.0	0.0	NA	NA	NA
CG13054	0.0	0.304830724890983	0.332305500826944	0.941902006605117	NA
CG13055	0.0	0.0	NA	NA	NA
CG13056	0.0	0.0	NA	NA	NA
CG13058	0.0	0.3239257110859805	0.376537525008433	0.934136406989217	NA
CG13059	0.0	0.0	NA	NA	NA
CG13060	0.0	0.0	NA	NA	NA
CG13062	0.0	1.56234359684491	2.65910003964134	0.543424465892878	NA
CG13063	0.0	0.0	NA	NA	NA
CG13064	0.5313969797059334	0.0	-2.05938332249859	0.651692607716397	NA
CG13065	0.0	0.0	NA	NA	NA
CG13066	0.0	0.0	NA	NA	NA
CG13067	0.8337199563171432	2.22929000521187	1.38923924608844	0.603667013426691	NA
CG13068	1.0557866856762501	0.304830724890983	-1.79769118231268	0.689714660124205	NA
CG13069	0.0	0.0	NA	NA	NA
CG1307	746.4680739413229	613.6069293922444	-0.281466079180659	0.482097516938193	0.789226751771405
CG13070	0.0	0.0	NA	NA	NA
CG13071	0.0	0.0	NA	NA	NA
CG13073	0.0	3.0674022351048253	3.63284780543109	0.388506073536981	NA
CG13074	0.0	1.5814385830399051	2.67595311157327	0.540821279082523	NA
CG13075	22.214821692801504	11.5467556819253	-0.936612207570914	0.409601907801386	0.741707868078207
CG13077	0.0	6.020923607268645	4.6048242727602	0.140988974116465	NA
CG13078	0.0	10.917310191719395	5.46387564474056	0.0288031037035387	NA
CG13081	12.5265675883849	8.097453722920525	-0.625999194103035	0.783608979765273	0.929881211004399
CG13082	14.475815811581768	8.840780076067494	-0.729933680502186	0.494172182814314	0.794350624784498
CG13083	4069.1159953191095	1052.5377833034254	-1.95092330081773	0.0119035770339653	0.108858264599737
CG13084	3269.8209909601173	802.8600589366135	-2.02609617326434	0.00735857103103317	0.0790339565669533
CG13085	6.126667932169627	20.10111096506785	1.68960673023735	0.147809249840234	0.471174233600529
CG13086	8.226292987281434	1.29570284434392	-2.68636891691413	0.139333101545711	NA
CG13088	217.95779287755067	202.725524082854	-0.106467154757029	0.730987871800776	0.905136784153648
CG1309	1104.8599056527494	823.8059741416455	-0.422776633296795	0.227199350464135	0.579512424624056
CG13091	6.263283794192433	2.21019501901687	-1.49839997001472	0.566579448628314	NA
CG13096	3537.645779457843	2835.5114027296	-0.318871275729932	0.200436578671361	0.546378581142638
CG13097	1545.0064232942066	1537.41440912164	-0.00639087390374638	0.982235321279663	0.994913730377947
CG13101	343.039844944906	211.48923515991248	-0.695810602544248	0.0823908818846794	0.344310663164945
CG13102	3.719778857941533	0.0	-4.99924758565073	0.259791086700926	NA
CG13108	0.0	1.943554266515885	2.9724157432823	0.496065131385296	NA
CG1311	696.541163664641	848.764592664545	0.283751982669941	0.310903619690268	0.660845897751015
CG13110	0.0	0.0	NA	NA	NA
CG13113	4042.820391311386	4447.8328733924645	0.137682025575678	0.927767436553978	0.976583750355072
CG13114	7405.90490824257	2497.8749075760197	-1.56809234612816	0.0299722728598228	0.192577494322126
CG13116	119.23109557904257	440.96692835953854	1.88123439782152	0.0356386382353296	0.212894707649431
CG13117	332.460012305381	1233.7360754124302	1.88907302532985	0.00537734939335807	0.0652027254109056
CG13123	111.94220998758779	142.9179717744915	0.355228087276921	0.32933905062427	0.676469195469333
CG13124	413.3262665345401	994.6818553801104	1.26510472075892	0.102309616509467	0.387288281889607
CG13126	380.64903608212563	332.7458195351785	-0.193054861673915	0.490058067366169	0.792688473586622
CG13127	0.0	0.609661449781965	1.30528413248232	0.769270538241484	NA
CG13131	0.0	0.0	NA	NA	NA
CG13133	0.0	0.0	NA	NA	NA
CG13135	0.0	0.0	NA	NA	NA
CG13137	2.4635022665779203	0.3239257110859805	-2.95998451132815	0.478120123862165	NA
CG13138	719.1199239408958	760.703257872296	0.080787330743396	0.962453865024584	0.989135564979061
CG1314	0.0	0.3239257110859805	0.376537525008433	0.934136406989217	NA
CG13144	36.67662295691206	54.33969424651985	0.564362353213689	0.288430122512172	0.641455405658311
CG13148	47.22465557597106	55.6913039409908	0.235106993030443	0.861417069429008	0.954944989185877
CG1315	13.32520332871728	0.3239257110859805	-5.38782726509646	0.00581435804636463	0.0682144969468837
CG13151	143.04952485574833	113.51986822736325	-0.331568372862688	0.379866332660617	0.719671774124294
CG13154	20.38923694177933	7.8117179842245505	-1.37975412080353	0.160192463031043	0.49109228238971
CG13155	0.0	0.0	NA	NA	NA
CG13157	0.0	1.8289843493459	2.88759161540756	0.50866654700656	NA
CG13159	0.0	0.0	NA	NA	NA
CG1316	1633.1566719959235	1031.959099151265	-0.661610325935927	0.0504617446286368	0.259613983356429
CG13160	1.4147228546372832	0.304830724890983	-2.17019089693597	0.569315983108564	NA
CG13163	339.437219203853	312.701304474467	-0.115807129495167	0.742969764800358	0.910490080252382
CG13164	13.804421003420252	0.9335871608679456	-3.88107950545788	0.0556693632475141	0.27549675792777
CG13168	1.1856488515425598	9.10742082856847	2.87244636360087	0.114275330914397	NA
CG1317	1361.6239899168531	1307.61899169899	-0.0579394713706882	0.829347245533772	0.948455966581485
CG13170	0.0	0.0	NA	NA	NA
CG13171	0.0	0.0	NA	NA	NA
CG13175	0.0	0.0	NA	NA	NA
CG13177	2.8154311618033367	0.0	-4.62100499717427	0.298524038978354	NA
CG13185	12715.36438057074	10281.106232221424	-0.306567661010108	0.496830491931168	0.795093748407679
CG13186	0.0	0.0	NA	NA	NA
CG13192	444.236608844958	374.47150603554	-0.247114613005196	0.413766110767897	0.746067747327081
CG13193	0.0	0.0	NA	NA	NA
CG13196	25.477007547018502	44.05114049077745	0.779012702341202	0.223308024459115	0.575404807419189
CG13197	568.2488077275226	846.150646718517	0.573714275414632	0.0471258569942881	0.250135038182665
CG13198	3.5639538283632963	1.905364294125885	-0.904149726621685	0.60345493972006	NA
CG13202	10.953905625632158	5.106431432595695	-1.08635516812233	0.448621417497682	0.769313325383198
CG13203	0.0	0.91449217467295	1.88896676350255	0.668385009972474	NA
CG13204	119.13197330405505	158.102912114685	0.406202311193887	0.290063155640571	0.642905591156986
CG13215	3.4270843887613736	2.819856468798835	-0.313079264604573	0.879657401611132	NA
CG13216	2.89074636655036	3.410422932385805	0.248907711813574	0.926906279169904	NA
CG13217	6.431057140011377	2.1529100604318803	-1.55644633978257	0.378734298437217	NA
CG13218	139.51697185205086	32.33321898732615	-2.10574586317231	0.000403377171708389	0.00948211383404516
CG13220	917.1687584973228	557.623688224497	-0.717167930786639	0.0844669737261361	0.349736552942124
CG13223	2.8154311618033367	0.0	-4.62100499717427	0.298524038978354	NA
CG13226	16.591268067816237	3.505897863360795	-2.23984609949267	0.109459157592765	0.40061431952653
CG13227	106.19187473828322	63.04612036499336	-0.750886119489501	0.127002967371708	0.43424518728118
CG13228	1.7973020785005964	2.1529100604318803	0.264536308073066	0.917177862277244	NA
CG13229	4.575075637930433	8.402284447811525	0.846887596330737	0.7105826718146	0.896506047155209
CG13230	0.0	0.0	NA	NA	NA
CG13231	0.0	0.304830724890983	0.332305500826944	0.941902006605117	NA
CG13239	0.0	0.0	NA	NA	NA
CG1324	5.299701672009	0.0	-5.51630590928883	0.202096641024061	NA
CG13243	0.0	0.0	NA	NA	NA
CG13244	0.0	0.609661449781965	1.30528413248232	0.769270538241484	NA
CG13245	0.0	0.0	NA	NA	NA
CG13247	1.9271642443669066	1.600533569234903	-0.259251824568455	0.935157132391489	NA
CG13248	2.4635022665779203	4.744315749119725	0.900594727485322	0.722160456894084	NA
CG13250	4.650390842677447	1.619628555429905	-1.53112014368706	0.560793790218679	NA
CG13251	0.0	0.0	NA	NA	NA
CG13252	2963.6376702155735	2161.814630561445	-0.454818446402079	0.141239348736058	0.459490427106354
CG13255	49.9034230284449	52.13018828173195	0.0547349193716122	0.934635653786806	0.980121318778965
CG13258	4.959721093024283	1.924459280320888	-1.36841904604254	0.457931303456301	NA
CG13272	3.5192889522541666	13.56600083899225	1.90045124029946	0.358114132717035	0.702438606516952
CG13280	0.0	4.7061257767297295	4.24968148255052	0.213954398290616	NA
CG13282	29.9902753725149	19.11023884561485	-0.655384370172523	0.504375844790354	0.797547678132798
CG13283	1.0557866856762501	8.878970048457479	2.96059873397965	0.182012629905789	NA
CG13284	97.70762222561389	17.91001093224595	-2.44369298033504	0.000199184832581102	0.00575466123850932
CG13285	0.0	1.619628555429905	2.70912162406584	0.535716032452094	NA
CG13287	0.0	0.0	NA	NA	NA
CG13288	2.4089553054586332	0.97177713325794	-1.30734646456073	0.74351179579479	NA
CG13293	3.112813095909466	0.952682147062943	-1.71183819004209	0.484549401541554	NA
CG13295	218.160454945791	348.17623847899097	0.670311620624712	0.109152227809343	0.400199040138969
CG13296	0.0	0.3239257110859805	0.376537525008433	0.934136406989217	NA
CG13297	11.131307478882134	6.30665934596463	-0.818059122529975	0.617657759805017	0.857519694623853
CG13298	2305.83883225528	2035.74217387188	-0.179704759732146	0.459960467027656	0.7763422392392
CG13299	4100.015638611923	2359.28185090859	-0.797490260783531	0.205471727149771	0.552825707506548
CG13300	194.188699572799	115.5759252483625	-0.745948073588883	0.067282314488483	0.30710546282188
CG13305	0.0	0.0	NA	NA	NA
CG13306	0.0	0.3239257110859805	0.376537525008433	0.934136406989217	NA
CG13308	0.0	0.91449217467295	1.88896676350255	0.668385009972474	NA
CG13309	141.10683483514433	0.0	-10.2554986769682	1.51652998502929e-11	4.61337342210528e-09
CG13310	6.3554883576852506	0.91449217467295	-2.78848436268602	0.281335997747628	NA
CG13311	8.308869043343186	0.0	-6.1642599167403	0.0355108665721232	NA
CG13312	0.0	0.0	NA	NA	NA
CG13313	2.241435537218813	3.505897863360795	0.598078678052578	0.786823121243288	NA
CG13314	33.84511101640694	74.4217102253927	1.1233039853102	0.0559124125375796	0.276171004238866
CG13315	1638.9129041412464	2935.995503416265	0.840926085027918	0.548735405793786	0.826138326364647
CG13318	0.0	0.3239257110859805	0.376537525008433	0.934136406989217	NA
CG13319	239.21991860678634	178.3581610777705	-0.422685517043456	0.184191234773132	0.52714165502449
CG13321	324.25237145515433	648.8350066846915	1.00098051137446	0.0707329771793887	0.315849781941925
CG13323	94.57751854712264	1.276607858148923	-6.22979383151394	2.00375486429323e-10	4.31767428362185e-08
CG13324	1.4077155809016701	0.0	-3.6344300497577	0.417367948842791	NA
CG13325	1.44537318327518	0.6287564359769635	-1.18995663169893	0.745049491201356	NA
CG13326	3.3348798252685765	5.65880792379267	0.745670324358177	0.680379137146953	NA
CG13330	15.249794186695453	7.506887259333565	-1.02017469687055	0.553650314830764	0.829174020917385
CG13331	0.0	0.0	NA	NA	NA
CG13332	0.0	0.3239257110859805	0.376537525008433	0.934136406989217	NA
CG13334	4.130942179212206	2.19110003282187	-0.943325092901175	0.653617768534822	NA
CG13337	5.484110798994603	1.600533569234903	-1.78804241317886	0.396531450388233	NA
CG13339	130.24200538415099	252.5479752519075	0.952813839997239	0.0159179226044999	0.131082064887215
CG13344	281.47930919745664	426.219794593372	0.600823513711444	0.0347228204803014	0.20980189071805
CG13358	1.8895066419933968	8.231118626285529	2.05682943135859	0.264653058516639	NA
CG13359	9.432963660030845	8.783495117482492	-0.0854664939621185	0.93864605842332	0.980966636839863
CG13360	5.602278226199314	4.4967699828137295	-0.3235827746461	0.844091924908958	NA
CG13361	0.7038577904508333	4.68703079053473	2.61078952543673	0.326929487192434	NA
CG13362	0.0	1.8480793355408955	2.90205652044776	0.506505862177014	NA
CG13364	2051.00937548089	1779.75916826756	-0.204124920658152	0.447111342039836	0.768133928463952
CG13365	86.123155630354	80.78565452994229	-0.0900188995168626	0.825191095248301	0.947338534018588
CG13366	2077.2293187790565	3168.9835207944197	0.609512501751561	0.0482226968619965	0.253567541252481
CG13367	227.745755737645	226.1245552258245	-0.00841860959768966	0.979665135575453	0.994602722977923
CG13369	423.20666913858895	217.6267958470385	-0.957483426528697	0.0173608509365508	0.139304329896621
CG13373	251.60114610037465	389.8303684141755	0.629968794608122	0.09705466372367	0.377243590687114
CG13375	81.7079376855129	111.2135092231425	0.439715522916822	0.609727089893366	0.854830284675249
CG13376	9.192194918274536	1.5814385830399051	-2.53588623640169	0.186161825481348	0.530725402688418
CG13377	418.4165982614233	360.60136352588654	-0.216264554279104	0.53730140797891	0.818095851724711
CG13380	0.0	0.0	NA	NA	NA
CG13384	3071.684362098537	14664.4202187018	2.25491136510315	3.43928199562687e-05	0.00143437474519229
CG13385	6.825584680115386	32.08567322102015	2.24793724340863	0.0102062902025758	0.0986576257619082
CG13386	8.06784672400777	12.346677939428297	0.633766528248835	0.574275892293995	0.840551825374191
CG1339	1.4077155809016701	4.324915107058755	1.55528520679208	0.563984922102972	NA
CG13390	183.99532301398332	171.364082228786	-0.106053518463774	0.761881382265011	0.919780005443864
CG13392	229.7949765308077	198.20965911384548	-0.212827540923953	0.546352307716102	0.825033644586686
CG13397	581.8822067239021	1483.70967279916	1.34998895035857	3.03544630848114e-05	0.0012867057855992
CG13398	421.92278104520034	673.09124504375	0.673350846189151	0.0570998478915906	0.279764910820806
CG1340	0.0	0.0	NA	NA	NA
CG13403	17.453572121540734	8.19292865389552	-1.09299735249045	0.486168167069503	0.791132371302686
CG13404	0.0	0.97177713325794	1.9711394364936	0.654546505538498	NA
CG13405	46.985699487866206	41.02192822806265	-0.19775584325202	0.885224979545629	0.964230919363316
CG13407	0.0	1.276607858148923	2.3663442356341	0.589597915420043	NA
CG13408	11.190288327348265	15.6234359684491	0.472556030066384	0.745050687765977	0.910839073524731
CG13409	7.657238405201986	14.385018082690202	0.876499284572073	0.49439311688736	0.794350624784498
CG13423	11.4313106466837	9.46953651204443	-0.289792656209212	0.793332854068046	0.933391162510045
CG13426	0.0	0.0	NA	NA	NA
CG13427	0.0	0.0	NA	NA	NA
CG13428	0.7038577904508333	1.905364294125885	1.33690349960019	0.690883593269614	NA
CG13430	0.0	0.0	NA	NA	NA
CG13436	31.065271225746567	27.5889032382064	-0.183131095256109	0.798606137664647	0.93523361434165
CG13437	0.0	0.3239257110859805	0.376537525008433	0.934136406989217	NA
CG13438	3.8543284887338003	0.0	-5.05620240493895	0.25428217032537	NA
CG1344	1529.01069209209	1945.87557456387	0.34768126859416	0.11585090662869	0.414132859673078
CG13442	0.0	0.3239257110859805	0.376537525008433	0.934136406989217	NA
CG13443	0.0	0.0	NA	NA	NA
CG13445	0.0	0.0	NA	NA	NA
CG13449	1.0557866856762501	1.276607858148923	0.218282607578071	0.950298875029891	NA
CG13454	3.8712178474796004	3.0674022351048253	-0.359158473794685	0.897042407516224	NA
CG13455	0.7038577904508333	3.7534436296667852	2.29763866241476	0.415735638006968	NA
CG13457	78.1335467696744	49.55718852501015	-0.660785941346483	0.310804580511007	0.660771613050267
CG13458	7.059346148136086	7.506887259333565	0.0872164399442737	0.958886846538645	0.987547744366093
CG13460	0.7038577904508333	4.077369340752765	2.41404345950857	0.381520806070576	NA
CG13461	0.0	0.0	NA	NA	NA
CG13465	0.0	0.0	NA	NA	NA
CG13471	0.0	0.0	NA	NA	NA
CG13473	10.92794276192022	10.384028686717375	-0.0562063769812348	0.957839319484176	0.987189058764786
CG13474	0.0	0.0	NA	NA	NA
CG13476	1.44537318327518	0.609661449781965	-1.23361996612482	0.777573164847489	NA
CG13477	2.4089553054586332	3.486802877165795	0.544293681000816	0.841380436729633	NA
CG13481	0.0	0.304830724890983	0.332305500826944	0.941902006605117	NA
CG13482	6.799621816403454	4.039179368362765	-0.756695260845818	0.67523801952228	0.881260168570214
CG13484	116.27863096229913	92.35081614383364	-0.33352718894259	0.453863279679495	0.772107963613674
CG13488	3.8712178474796004	8.173833667700524	1.04246609877708	0.646858132351752	NA
CG13492	29.222447843786146	2.78166649640884	-3.38208232939231	0.0146640793486599	0.123511513289336
CG13494	0.0	0.64785142217196	1.38496720581544	0.755277060824762	NA
CG13500	0.0	0.0	NA	NA	NA
CG13501	0.0	1.924459280320888	2.95859913450341	0.498106306527034	NA
CG13502	5.982791218832101	8.935565952813505	0.556549294109722	0.810917365479816	0.942819054761436
CG13506	385.71760365218165	564.7528100853044	0.547718420583837	0.210418012025913	0.559473907039594
CG13510	0.0	0.0	NA	NA	NA
CG13511	0.0	0.0	NA	NA	NA
CG13516	355.1409872193423	323.5217616267535	-0.13677241260467	0.699028618810558	0.892403533472705
CG13526	0.0	0.0	NA	NA	NA
CG13527	0.0	0.0	NA	NA	NA
CG13531	2323.658995672197	3616.238212045945	0.637608525946785	0.0836520443395252	0.348314450323554
CG13532	2.63102203481774	1.276607858148923	-1.04996719245815	0.66855490769278	NA
CG13538	0.0	0.609661449781965	1.30528413248232	0.769270538241484	NA
CG13539	0.0	0.0	NA	NA	NA
CG1354	4560.03338321635	2810.6864491100696	-0.697877513980648	0.0059794729000469	0.0694895373091967
CG13540	14.189573613672318	26.235915435277498	0.905477026415794	0.302014006290898	0.653090292090061
CG13541	1.9271642443669066	0.0	-4.05338221013364	0.363754815303715	NA
CG13544	0.0	0.0	NA	NA	NA
CG13545	0.0	2.172005046626875	3.13461482662261	0.472440678534255	NA
CG13551	1144.6986318582553	1001.5816388743581	-0.191889625910467	0.500986560743996	0.79641232718086
CG13557	0.0	0.0	NA	NA	NA
CG13558	0.0	0.0	NA	NA	NA
CG13559	0.0	0.0	NA	NA	NA
CG13560	0.0	2.4768357715178597	3.32410204933445	0.445647906888726	NA
CG13561	12.56034630587643	10.09829294802141	-0.328145087818055	0.831030524419712	0.948713986100782
CG13562	11.818830913052102	23.644509746589648	0.981624881785434	0.495575873650978	0.794930859397389
CG13563	10.061252668155554	9.659797319765435	-0.06092269517004	0.9569086809495	0.986961326498017
CG13564	0.0	0.9335871608679456	1.9168147988475	0.663683394616018	NA
CG13566	24.170570034575764	7.31662645161258	-1.72195458280738	0.0561803562039694	0.276701630579836
CG13575	5.127494438843203	2.21019501901687	-1.20526914433934	0.5510631934005	NA
CG13577	5.132181903769187	12.022063174113313	1.22067289053618	0.464863550658199	0.780279731330372
CG13578	0.0	1.600533569234903	2.69262506814091	0.538252149962657	NA
CG13579	0.0	2.19110003282187	3.14688377821978	0.470679326355963	NA
CG1358	386.14373774722435	353.0781374972735	-0.131316481957214	0.736939993120064	0.907800504407046
CG13581	0.0	0.304830724890983	0.332305500826944	0.941902006605117	NA
CG13585	728.0439766402516	696.642347022052	-0.0634636058866903	0.860267364190433	0.954911044524832
CG13587	0.0	2.80076148260384	3.50122555451697	0.405029316499249	NA
CG13589	0.0	0.0	NA	NA	NA
CG13590	0.0	0.0	NA	NA	NA
CG13594	1.9271642443669066	0.0	-4.05338221013364	0.363754815303715	NA
CG13599	111.3347951544132	164.9796648295835	0.560943033539846	0.278032836691833	0.629805876019192
CG1360	238.784399345183	238.545545947346	-0.000550883622509567	0.998861257347194	0.999876066479718
CG13601	372.32575537181197	335.9639144971565	-0.146037035115279	0.656770076852913	0.874507402163792
CG13603	616.1499050854827	1088.2975654602	0.819165061430012	0.0197912556258817	0.150512992073744
CG13604	447.5017132534194	950.148516854855	1.08406077852789	0.0183820493166386	0.145023292205944
CG13605	723.8632187078159	739.0731699031705	0.0288190389892803	0.92106132498382	0.97538331680822
CG13606	2.4089553054586332	2.438645799127865	0.0252048252916031	0.994595464827854	NA
CG13607	0.35192889522541665	7.202056534442585	3.90190201864145	0.105224388539575	NA
CG13609	25.500650601920768	103.00079652882326	1.99829692245701	0.00145155379435388	0.0254034194500883
CG13611	20.752860575666332	20.3486567313738	-0.0268201586116825	0.980634055495464	0.994602722977923
CG13613	0.0	0.0	NA	NA	NA
CG13614	0.0	1.524153624454915	2.62484056104789	0.548735237959236	NA
CG13615	0.0	0.0	NA	NA	NA
CG13616	42.86136746289052	3.7725386158617846	-3.4997734055684	0.0113702428996514	0.105948128208193
CG13617	3.3725374276421003	1.21932289956393	-1.46038077020293	0.692960443778252	NA
CG13618	1.946119834343217	2.534120730102855	0.408296121240555	0.862933279942198	NA
CG13622	0.7038577904508333	1.21932289956393	0.716390448018425	0.869849281712426	NA
CG13623	75.91308520635586	65.37088530118021	-0.212825025620527	0.638395524709471	0.866576253275088
CG13625	468.3225263555323	509.99716046786847	0.123167963346853	0.6135673480973	0.855988776712417
CG13627	0.0	0.0	NA	NA	NA
CG13630	1153.8027710445767	778.573011669465	-0.567603366508706	0.0344804476752411	0.209413546861432
CG13631	100.64953358685058	150.4050749934015	0.586392208031104	0.300307649406594	0.652086871652806
CG13634	3.112813095909466	3.486802877165795	0.161840029873273	0.937699076000962	NA
CG13639	4.754543722410934	0.304830724890983	-3.94810242998081	0.188010457210895	NA
CG13640	2.4089553054586332	0.0	-4.37642762516465	0.32558008711412	NA
CG13641	3.3725374276421003	2.7625715102138453	-0.278783015879714	0.922476109605793	NA
CG13643	0.0	0.952682147062943	1.94420141998357	0.659071403800253	NA
CG13646	1.0627939594118667	6.783344946610582	2.7381683816608	0.3195799110952	NA
CG13650	27.146513690883335	33.70461272222105	0.314514799919502	0.637833068869433	0.866528391949786
CG13653	0.0	0.0	NA	NA	NA
CG13654	26.390983750587733	41.8409454717606	0.655001545864219	0.316098707737135	0.665867400025496
CG13658	55.90612606355406	17.986390877025947	-1.63108693927516	0.0337057018058203	0.206452253351336
CG13659	79.67213882675887	143.71927214045252	0.843838855732472	0.133853812847841	0.445590597452597
CG13663	434.9338128800157	303.07762996440454	-0.519918006082412	0.207342972744751	0.556170287673602
CG13667	291.309928786445	243.842927241892	-0.255544857851303	0.374696882185017	0.714494678221373
CG13670	0.0	0.0	NA	NA	NA
CG13671	317.96839463852933	301.93468700962046	-0.0723491060412217	0.821941743488253	0.947002155181178
CG13674	0.0	0.304830724890983	0.332305500826944	0.941902006605117	NA
CG13675	0.0	0.3239257110859805	0.376537525008433	0.934136406989217	NA
CG13676	150.5813349824307	96.46637545697641	-0.641724132271085	0.0823539222485954	0.344295318438651
CG13678	0.0	0.0	NA	NA	NA
CG13679	0.0	1.257512871953925	2.34561462406901	0.592933191303671	NA
CG1368	0.35192889522541665	0.0	-2.05938332249859	0.651692607716397	NA
CG13685	14.891111595313532	23.168513200172697	0.634942060996478	0.493366728526947	0.794224447183535
CG13689	150.76842342712732	218.2718910522945	0.528446240289807	0.297512771849933	0.649466990131672
CG13690	312.00480848291596	362.18004589201	0.2136138757179	0.631167468175174	0.863578755353921
CG13692	23.989289296443804	21.301338878436752	-0.176844662920602	0.85585797364847	0.953976637796283
CG13693	0.0	1.8289843493459	2.88759161540756	0.50866654700656	NA
CG13694	48.73370730934724	137.8722705716261	1.49776044059286	0.535919447062465	0.817553811352076
CG13698	1003.422570532543	758.066082614699	-0.40387989826667	0.147825620036132	0.471174233600529
CG13699	44.66804447124296	22.52135083222965	-0.980423039678825	0.346314406206789	0.69328182417087
CG13700	0.0	0.0	NA	NA	NA
CG13704	6.010820313774553	5.0873364464007	-0.233251973514846	0.898547157466661	0.969304063475091
CG13705	0.0	0.0	NA	NA	NA
CG13707	13.013806847139927	176.05249112777898	3.74395645415588	4.75547993455144e-06	0.000274781726050645
CG13708	16.95045781435637	43.0220783989345	1.36166562822581	0.0752565440716974	0.328845980284566
CG1371	5070.76050902844	3292.808970601035	-0.622656317155354	0.0447441197410909	0.243444729343558
CG13711	90.86912276624803	9.374061581069466	-3.27252593823554	8.62483469095535e-06	0.000446828784374515
CG13712	2.1115733713525033	0.0	-4.21060444172556	0.344829010575961	NA
CG13713	22.892463041961303	11.9654672697573	-0.928317642888719	0.387596562727209	0.724283875029363
CG13716	0.0	0.0	NA	NA	NA
CG13720	0.0	2.51502574390785	3.34562754138074	0.442660357436344	NA
CG13721	2.6569848985296667	1.257512871953925	-1.05584545924137	0.730414139837786	NA
CG13722	0.0	0.0	NA	NA	NA
CG13723	0.0	0.304830724890983	0.332305500826944	0.941902006605117	NA
CG13724	134.06915096858435	40.944859229053606	-1.711297430572	0.44575843046629	0.767597639314966
CG13725	0.7038577904508333	2.51502574390785	1.73096155376322	0.579347634511164	NA
CG13727	0.0	0.0	NA	NA	NA
CG13728	0.9635821221834533	2.743476524018845	1.52337672658839	0.705752041179694	NA
CG13731	0.0	0.0	NA	NA	NA
CG13733	22.876382263259533	44.10842544936245	0.942195828535336	0.28550710222301	0.639039159985412
CG13737	130.08200004480534	55.2350914349978	-1.23906850728646	0.00252433559202699	0.0380600627235206
CG13738	0.0	0.0	NA	NA	NA
CG13739	1.9271642443669066	6.9163207957466	1.86152330497238	0.435763206917428	NA
CG13741	799.6035342379649	1629.93225676163	1.02739400100171	0.0331957568931613	0.204402314393126
CG13742	183.10604178623032	241.95390171704497	0.40084038908787	0.349452949663997	0.695283173591606
CG13743	1.4077155809016701	0.0	-3.6344300497577	0.417367948842791	NA
CG13744	0.0	0.0	NA	NA	NA
CG13747	0.0	0.0	NA	NA	NA
CG13748	0.7038577904508333	4.02008438216777	2.39773185609747	0.397063730840276	NA
CG13749	23.91810655415786	16.690688032681997	-0.515060061996449	0.579070345529044	0.842498886454762
CG13751	400.99951565331065	346.444796223307	-0.210113121527487	0.467107030215484	0.781394540744045
CG13759	2.1115733713525033	0.91449217467295	-1.22590643034836	0.763601350569964	NA
CG13760	191.68472297658866	248.471984019613	0.37307224013293	0.21638679740955	0.567898666736101
CG13766	168.095409417912	204.70726832176	0.282159112504017	0.415603915057759	0.747711131230197
CG13771	25.670236601391135	14.65165883519115	-0.805351749533212	0.343792916042117	0.692338249899652
CG13773	367.26615740343533	479.92935429545696	0.387435341424292	0.218251033661349	0.570550644162585
CG13775	77.9155646554698	70.24886595366495	-0.144612469164822	0.752050962998718	0.913795415124048
CG13784	2868.6922286640997	4288.3061059639	0.579645808497946	0.0889905704659351	0.360235293742411
CG13786	317.8311984281883	202.02865635284508	-0.655830315283572	0.42988080995314	0.757215186634596
CG13793	4.669346432653756	6.9163207957466	0.554059089181227	0.677348800864242	NA
CG13794	6.686649009282934	14.118377330189201	1.05356233054631	0.617251970260972	0.857404932636213
CG13795	28.9866679918416	33.93444161079	0.222931348309579	0.755049803063774	0.91554870519773
CG13796	284.49535256535097	468.560654977348	0.717012643428696	0.310804785602779	0.660771613050267
CG13801	0.0	0.0	NA	NA	NA
CG13806	18.537387902159452	8.726210158897505	-1.07809957977641	0.356386983762043	0.701314797003579
CG13807	280.0912040079463	165.8941570042565	-0.752607003697743	0.110375059997357	0.402400157050638
CG13810	7.947613065572533	13.56600083899225	0.752151033364287	0.613668400905431	0.855988776712417
CG13813	76.03366813698374	49.04300200620315	-0.635628753822128	0.383633227354674	0.721320753365979
CG13827	301.96670605555	167.629733585314	-0.848123430920307	0.00862106803913142	0.087849957368213
CG13829	0.0	1.276607858148923	2.3663442356341	0.589597915420043	NA
CG13833	8.115132833812337	5.6969978961826655	-0.516762942025386	0.760849776468678	0.919436071663583
CG13837	0.35192889522541665	0.0	-2.05938332249859	0.651692607716397	NA
CG13838	0.0	0.0	NA	NA	NA
CG13840	55.02456499496756	13.33755005888121	-2.03933514611687	0.068528129175793	0.310734958380196
CG13841	0.0	1.21932289956393	2.30332972291386	0.599762371259789	NA
CG13842	13.414834505821338	5.068241460205705	-1.40517880879743	0.411064514182028	0.74344948845932
CG13843	10.27837835500957	15.261320284973099	0.5813690966706	0.61448751726089	0.855988776712417
CG13847	0.0	2.172005046626875	3.13461482662261	0.472440678534255	NA
CG13850	1069.2495775858479	984.837111154236	-0.117839827718708	0.651034048846273	0.871338872570105
CG13855	0.0	0.0	NA	NA	NA
CG13856	4.390666510944826	8.13564369531053	0.864350015422181	0.602737812100697	0.85200453608822
CG13857	0.0	1.29570284434392	2.38680714623762	0.586313799071008	NA
CG13862	0.0	0.0	NA	NA	NA
CG13865	1017.6262605206699	1097.993485589665	0.109068852222891	0.658017774768181	0.87479149671302
CG13868	4867.842362101484	7145.532934312385	0.553531916407467	0.175848891850514	0.513800810762932
CG13869	2.9948992462838535	8.097453722920525	1.39023402417561	0.456316736970378	NA
CG1387	4.251175837647467	1.257512871953925	-1.74036370701299	0.544174321152813	NA
CG13870	4.29846194745203	1.276607858148923	-1.76091716635678	0.429397448592619	NA
CG13871	3.8712178474796004	4.211034244117745	0.102912684086811	0.975366416055473	NA
CG13872	0.0	0.3239257110859805	0.376537525008433	0.934136406989217	NA
CG13875	106.4560808046694	93.15142745556555	-0.195099309639048	0.68217747840614	0.884513182794874
CG13876	139.986571256032	180.20486230485352	0.366900566922927	0.299328116741056	0.651504779346116
CG13877	11.655697184852466	8.231118626285529	-0.503794522057119	0.751888711846304	0.913795415124048
CG13884	0.0	0.3239257110859805	0.376537525008433	0.934136406989217	NA
CG13887	2798.9186661536437	1713.811299055155	-0.707353596861218	0.116756554441874	0.415701563715078
CG13890	306.83588759247635	422.8454944706895	0.460639876630818	0.133221804733332	0.445206179759889
CG13891	28.07919190684977	26.36958033864245	-0.0872271396992647	0.912911924919007	0.973003522284062
CG13893	2997.324765594467	1849.99031734349	-0.695845895127156	0.00642358905849163	0.0730904088360604
CG13894	13.322629942328518	37.51603036470185	1.49618782563797	0.302943674130184	0.653732248617615
CG13895	289.0709087526493	282.82375910977703	-0.0318053081262141	0.917159661295999	0.974140724664666
CG13896	142.14996031914913	194.628759414163	0.451404278263202	0.466695795169618	0.781394540744045
CG13898	24.1609893744514	13.24207512790625	-0.868704471039328	0.564556944445779	0.836160276578482
CG13900	5093.437216769997	3562.102162627295	-0.515945057452795	0.0165327778251602	0.13464450476034
CG13901	186.24093886096932	217.302181081723	0.219414786065804	0.567703435791574	0.836670937074986
CG13902	128.77707376112835	174.0509628484485	0.438817653704478	0.228874007106955	0.582161896834283
CG13905	197.07959358560595	8.364094475421515	-4.55228531222686	1.04072846252689e-08	1.51609218139656e-06
CG13907	5434.581983974061	11742.3134622594	1.11127660858155	0.0206969117786556	0.154897365069924
CG13912	31.12062676690986	109.8994004468325	1.80772987172053	0.146036966668248	0.467200849443146
CG13917	6858.229235398343	9151.346479349055	0.416024762121701	0.120979909451412	0.422727161029321
CG13919	88.89442907120645	112.3748581098925	0.336631721103341	0.520503161504966	0.808055966310063
CG13920	2.4635022665779203	3.1628771660798147	0.320380034568998	0.905903210128213	NA
CG13921	543.4943436142706	380.607688614208	-0.512184138093769	0.187693232591405	0.532888033130086
CG13924	38.5630012100518	31.0763951696012	-0.306328460430238	0.696810380614475	0.892403533472705
CG13926	273.977087241789	244.224137911563	-0.162826818553819	0.657149558238835	0.874507402163792
CG13928	3.34682814150927	33.877156652205	3.26918218178355	0.0181807440531251	0.143764094603572
CG13930	3.464741991134883	3.12468719368982	-0.154464690919891	0.939095605857142	NA
CG13931	2.1255879188237334	1.5814385830399051	-0.399006370798365	0.897125596820345	NA
CG13933	497.03016515347235	590.249533492809	0.248966429473609	0.337491067474063	0.685789805674701
CG13937	51.51888936634864	72.5347518632328	0.491205546692813	0.553803066918977	0.829181401439343
CG1394	2.4089553054586332	0.0	-4.37642762516465	0.32558008711412	NA
CG13946	2.4089553054586332	1.5814385830399051	-0.59851071558723	0.843165850340881	NA
CG13947	0.9635821221834533	3.12468719368982	1.72135975819892	0.557608965065806	NA
CG13949	35.82707579947223	47.709798243698245	0.404189404699346	0.640536469891346	0.867489952709177
CG13950	1.0557866856762501	6.668775029440605	2.56011888507865	0.286759956051938	NA
CG13954	23.9648855088042	46.6616411656603	0.963283396849448	0.299470244767905	0.651676991717746
CG13955	2.63102203481774	5.2775972541217	1.00064229198115	0.610356217854797	NA
CG13962	6.017827587510166	1.56234359684491	-1.92887032997522	0.372536311753637	NA
CG13965	0.0	6.211184414989645	4.65032672175789	0.134184732154281	NA
CG13970	12.760582633984704	3.810728588251775	-1.74340679054936	0.254015888297681	0.608431318305526
CG13972	29.9970290686714	10.650669439218412	-1.49494002167194	0.319600860072667	0.668701211552954
CG13978	0.0	0.0	NA	NA	NA
CG13982	3.9465330522266098	9.603201415409451	1.27800827742275	0.472796602674233	0.783263724540521
CG13983	0.0	0.3239257110859805	0.376537525008433	0.934136406989217	NA
CG13984	0.0	0.609661449781965	1.30528413248232	0.769270538241484	NA
CG13989	0.0	0.0	NA	NA	NA
CG13991	3.9535403259622264	1.257512871953925	-1.6373067018703	0.475891054555713	NA
CG13992	6448.73486145018	1882.862330269645	-1.7759701870696	5.01910961277674e-06	0.000285234344642582
CG13994	296.7427686594307	228.541349821842	-0.373859443196255	0.331324435079345	0.678505079676389
CG13995	6.669759650537137	6.211184414989645	-0.111965739005498	0.947871997154766	0.984617863470096
CG13996	0.0	0.64785142217196	1.38496720581544	0.755277060824762	NA
CG13998	799.4289688655593	206.097067988621	-1.95460706392953	0.000131828626777378	0.00419539534387207
CG13999	77.9397148655303	7.98357285997955	-3.29204611930163	4.85102477616382e-06	0.000278745273665902
CG14000	0.0	0.0	NA	NA	NA
CG14005	216.70736570768634	238.697616782677	0.141872252821802	0.70051867565698	0.892673146937041
CG14006	10.627939594118667	0.64785142217196	-4.03707486710437	0.19458243405966	0.539713933432609
CG14007	0.0	0.0	NA	NA	NA
CG14011	0.0	0.0	NA	NA	NA
CG14013	0.0	0.0	NA	NA	NA
CG14014	0.0	0.0	NA	NA	NA
CG14015	6.59444444579012	5.125526418790695	-0.388951580940646	0.843226430027647	0.951400781692587
CG14017	12.342665616557504	6.363944304549625	-0.9443223009792	0.416888566769149	0.748070514589401
CG1402	0.0	0.0	NA	NA	NA
CG14020	0.0	1.943554266515885	2.9724157432823	0.496065131385296	NA
CG14022	0.0	0.64785142217196	1.38496720581544	0.755277060824762	NA
CG14024	10.79107332231832	10.707954397803373	-0.00596037333426028	0.995120154442658	0.998789857148109
CG14034	2.4635022665779203	2.915331399773825	0.218673838156177	0.951809082295699	NA
CG14036	220.00437809597204	636.3157848152795	1.5299071809144	0.0236610564218376	0.167174406980264
CG14042	0.0	0.0	NA	NA	NA
CG14043	546.1548642578623	539.5303070268195	-0.0162776538808889	0.952742526904225	0.986181380831453
CG14044	0.7038577904508333	1.257512871953925	0.745268488750633	0.838395326969153	NA
CG14050	57.65104310677943	53.4633920442369	-0.108495343674103	0.88947298345839	0.966043343632717
CG14052	6.984030943389066	6.192089428794651	-0.191936460572617	0.912754516767824	0.973003522284062
CG14053	27.238464676796998	29.20853179363635	0.101712065531241	0.899073181713674	0.96956666859186
CG14054	3.8712178474796004	20.596202497679798	2.36320535272276	0.216927993588306	0.568395245890035
CG14057	184.02148137125835	172.810477800003	-0.0879152586610292	0.822675014288685	0.947014766030926
CG14062	0.0	0.0	NA	NA	NA
CG14069	0.0	0.0	NA	NA	NA
CG1407	802.802851430329	889.0984123353585	0.148238323491985	0.566417098946382	0.836315152902777
CG14070	0.0	0.91449217467295	1.88896676350255	0.668385009972474	NA
CG14071	0.0	0.0	NA	NA	NA
CG14072	9.338439287728404	26.71260103592345	1.51553148162222	0.280870417137564	0.633637666207209
CG14073	2963.8893532096668	2843.4452702275203	-0.0596361332039189	0.807848084467905	0.940942875861659
CG14074	154.689638180348	215.07358013074048	0.47878516278491	0.291161370775524	0.644442982651668
CG14075	0.0	0.304830724890983	0.332305500826944	0.941902006605117	NA
CG14077	0.0	0.0	NA	NA	NA
CG14079	15.0446168160821	14.34682811030015	-0.0715337235428255	0.961864381598518	0.988941561612396
CG14082	0.7038577904508333	1.257512871953925	0.745268488750633	0.838395326969153	NA
CG14085	10.089535340677116	2.21019501901687	-2.18003601400422	0.270924221469362	0.624380379935531
CG14086	1.9391125606076034	0.3239257110859805	-2.61829677697348	0.456976689545403	NA
CG14088	0.0	0.0	NA	NA	NA
CG14089	0.0	0.0	NA	NA	NA
CG1409	0.0	0.0	NA	NA	NA
CG14095	0.0	0.91449217467295	1.88896676350255	0.668385009972474	NA
CG14096	0.0	0.0	NA	NA	NA
CG14100	374.6892433534897	496.773491271928	0.404382204226875	0.201405186180009	0.547100357336722
CG14102	78.13430750241186	130.28349093368058	0.730835620611248	0.177728313941537	0.516650913742922
CG14103	680.1522644488526	591.1237685324049	-0.201872422871326	0.636900434079286	0.866429197643306
CG14104	78.77273217312583	94.97834464222446	0.263122640211391	0.705643059442087	0.894639147316684
CG14105	0.0	0.0	NA	NA	NA
CG14106	0.0	0.0	NA	NA	NA
CG14107	2.7232265983105397	6.64968004324561	1.24656656956869	0.495227922875133	NA
CG14109	1.5375777467679768	0.0	-3.74933020055891	0.402208068468885	NA
CG14110	0.7038577904508333	4.039179368362765	2.40261309389515	0.38971318315448	NA
CG14111	7.2907399600404466	0.3239257110859805	-4.50470127825129	0.100810018988116	NA
CG14113	0.48179106109172665	0.609661449781965	0.343514463125295	0.938467545249776	NA
CG14115	0.0	0.0	NA	NA	NA
CG14117	227.182656508387	258.093591366988	0.18478441178098	0.582806521287583	0.844990812525144
CG14118	34.9694592106737	30.5806145827602	-0.203294407096767	0.778038437937505	0.92790807773543
CG14120	3.62056702071312	0.0	-4.95767727039153	0.177049998141967	NA
CG14125	1.0557866856762501	0.304830724890983	-1.79769118231268	0.689714660124205	NA
CG14130	153.21200774505567	88.78694426765875	-0.782889464218214	0.0890226637151313	0.360235293742411
CG14131	1155.4527167206618	542.7674969749925	-1.08927836745647	0.00464192234167994	0.0592733367654267
CG14132	10.507705935683406	8.783495117482492	-0.250338477790224	0.837282102226493	0.949453672528453
CG14135	137.697701962752	290.6191383247225	1.07214423027876	0.022485765318816	0.162522900553818
CG14137	0.0	1.5814385830399051	2.67595311157327	0.540821279082523	NA
CG14141	0.0	0.609661449781965	1.30528413248232	0.769270538241484	NA
CG14142	7.947613065572533	18.23393664333195	1.17707546678874	0.404105348395001	0.73754395949347
CG14143	0.0	0.0	NA	NA	NA
CG14147	1.0557866856762501	0.91449217467295	-0.241026956991202	0.955821613639841	NA
CG14151	0.0	0.3239257110859805	0.376537525008433	0.934136406989217	NA
CG14153	0.0	0.3239257110859805	0.376537525008433	0.934136406989217	NA
CG14154	1.0557866856762501	0.609661449781965	-0.824709076508051	0.851038461528509	NA
CG1416	3256.0119903679333	2899.54563899713	-0.167079657182721	0.459313999532925	0.776259373467884
CG14160	3.3725374276421003	0.0	-4.86314935499178	0.27329612430989	NA
CG14164	0.0	0.0	NA	NA	NA
CG14174	168.32634392196465	178.47204194071202	0.0817878261886099	0.822565544637566	0.947014766030926
CG1418	685.4890625883987	276.896243270796	-1.30660514607457	0.0118464175217432	0.108623667045558
CG14182	168.40620304971767	140.1363052780825	-0.262602614250109	0.566007354234189	0.836160276578482
CG14183	45.476911568778	71.8098314420519	0.654672624569668	0.273092587353204	0.626435269681568
CG14184	381.5303161992444	631.1173237228535	0.725050803309191	0.0975200510992575	0.377771493827573
CG14185	0.0	0.0	NA	NA	NA
CG14186	25.204077247858645	40.068557026770705	0.655345641200249	0.639966106082103	0.867489952709177
CG14187	3607.207408118726	472.690485897083	-2.93175723341472	3.91380430612639e-06	0.000235351615920147
CG14190	0.0	0.0	NA	NA	NA
CG14191	0.0	0.0	NA	NA	NA
CG14194	769.165202010783	977.736041984601	0.344729144735981	0.301221052440817	0.652086871652806
[truncated: 15,107 more rows]

## Sheet: DESeq2_results_extended_wit (2)
ACXA	0.0
ACXB	0.0
ACXC	0.0
ACXE	0.0
AOX4	0.0
ARY	0.0
ATPsynCF6L	0.0
Acam	0.0
Acp1	0.0
Acp26Ab	0.0
Acp29AB	0.0
Acp33A	0.0
Acp53Ea	0.0
Acp54A1	0.0
Acp62F	0.0
Acp65Aa	0.0
Acp95EF	0.0
Acp98AB	0.0
Act88F	0.0
Adgf-E	0.0
Adhr	0.0
Alk	0.0
Ama	0.0
Ance-4	0.0
Andorra	0.0
Anp	0.0
Arr1	0.0
Arr2	0.0
Art9	0.0
AstA-R1	0.0
AstC-R1	0.0
AstCC	0.0
Atg8b	0.0
AttD	0.0
B-H1	0.0
B-H2	0.0
B9d2	0.0
BBS4	0.0
BG642163	0.0
BG642167	0.0
Best4	0.0
BicC	0.0
BobA	0.0
Brd	0.0
Bro	0.0
Bsg25A	0.0
Burs	0.0
C15	0.0
C901	0.0
CCAP	0.0
CCHa1	0.0
CCHa2-R	0.0
CCKLR-17D1	0.0
CCY	0.0
CRG	0.0
CSN1a	0.0
CanA1	0.0
Capa	0.0
Cbp53E	0.0
Cby	0.0
Ccdc56	0.0
Ccp84Aa	0.0
Ccp84Ab	0.0
Ccp84Ac	0.0
Ccp84Ae	0.0
Ccp84Af	0.0
Ccp84Ag	0.0
Cep89	0.0
ChAT	0.0
CheA29a	0.0
CheA46a	0.0
CheA7a	0.0
CheA84a	0.0
CheB38b	0.0
CheB42a	0.0
CheB53a	0.0
CheB53b	0.0
CheB93a	0.0
CheB93b	0.0
CheB98a	0.0
Cngl	0.0
Cpn	0.0
Cpr100A	0.0
Cpr23B	0.0
Cpr31A	0.0
Cpr35B	0.0
Cpr47Ea	0.0
Cpr47Ec	0.0
Cpr47Ed	0.0
Cpr47Ef	0.0
Cpr49Aa	0.0
Cpr49Ab	0.0
Cpr49Ac	0.0
Cpr49Ad	0.0
Cpr49Af	0.0
Cpr49Ag	0.0
Cpr49Ah	0.0
Cpr50Ca	0.0
Cpr57A	0.0
Cpr5C	0.0
Cpr62Bc	0.0
Cpr65Au	0.0
Cpr65Av	0.0
Cpr65Aw	0.0
Cpr65Ax1	0.0
Cpr65Ax2	0.0
Cpr65Az	0.0
Cpr65Ea	0.0
Cpr65Eb	0.0
Cpr65Ec	0.0
Cpr66Cb	0.0
Cpr67Fa1	0.0
Cpr67Fb	0.0
Cpr72Ea	0.0
Cpr72Eb	0.0
Cpr76Ba	0.0
Cpr76Bb	0.0
Cpr76Bc	0.0
Cpr76Bd	0.0
Cpr78Cc	0.0
Cpr92A	0.0
Cpr92F	0.0
Cpr97Ea	0.0
Crtp	0.0
Crys	0.0
Ctr1C	0.0
Cyp12d1-d	0.0
Cyp308a1	0.0
Cyp309a2	0.0
Cyp311a1	0.0
Cyp312a1	0.0
Cyp313a1	0.0
Cyp313a2	0.0
Cyp313a3	0.0
Cyp316a1	0.0
Cyp4ac3	0.0
Cyp4d1	0.0
Cyp4d21	0.0
Cyp4g15	0.0
Cyp4p2	0.0
DCX-EMAP	0.0
DIP-delta	0.0
DIP-gamma	0.0
DIP-theta	0.0
DIP-zeta	0.0
DNApol-gamma35	0.0
Def	0.0
Dfd	0.0
Dh31	0.0
Dh44-R1	0.0
Dic3	0.0
Dic4	0.0
Diedel	0.0
Diedel3	0.0
DnaJ-60	0.0
Doc1	0.0
Dop1R2	0.0
Dop2R	0.0
DptA	0.0
Drsl1	0.0
Drsl6	0.0
E(spl)m4-BFM	0.0
E(spl)m5-HLH	0.0
E5	0.0
EAChm	0.0
Eaat2	0.0
EbpII	0.0
Edg84A	0.0
Efhc1.2	0.0
Eglp3	0.0
Eh	0.0
Eig71Ea	0.0
Eig71Eb	0.0
Eig71Ec	0.0
Eig71Ed	0.0
Eig71Ee	0.0
Eig71Ef	0.0
Eig71Eg	0.0
Eig71Eh	0.0
Eig71Ei	0.0
Eig71Ej	0.0
Eig71Ek	0.0
Elal	0.0
FMRFa	0.0
Fer3	0.0
FucTD	0.0
Fuca	0.0
GNBP-like3	0.0
GSS	0.0
Gas8	0.0
GatC	0.0
Gbeta76C	0.0
Gbp3	0.0
Gint3	0.0
GluClalpha	0.0
GluRIA	0.0
GluRIB	0.0
GluRIIC	0.0
Glut3	0.0
Gpa2	0.0
Gr10a	0.0
Gr10b	0.0
Gr22a	0.0
Gr22b	0.0
Gr22c	0.0
Gr22d	0.0
Gr22e	0.0
Gr22f	0.0
Gr23a	0.0
Gr28a	0.0
Gr2a	0.0
Gr33a	0.0
Gr36a	0.0
Gr36b	0.0
Gr36c	0.0
Gr39b	0.0
Gr47a	0.0
Gr57a	0.0
Gr58b	0.0
Gr59b	0.0
Gr59c	0.0
Gr59d	0.0
Gr64a	0.0
Gr64b	0.0
Gr64c	0.0
Gr64d	0.0
Gr64e	0.0
Gr68a	0.0
Gr77a	0.0
Gr89a	0.0
Gr8a	0.0
Gr92a	0.0
Gr93a	0.0
Gr9a	0.0
Grd	0.0
Grx-1	0.0
Gyc88E	0.0
Gycbeta100B	0.0
HDAC3	0.0
HGTX	0.0
HLH3B	0.0
HLH4C	0.0
HP1e	0.0
Hex-t2	0.0
Hey	0.0
Hmx	0.0
Hr51	0.0
Hs3st-B	0.0
Hsp22	0.0
Hsp60D	0.0
Hsp70Aa	0.0
Hsp70Ab	0.0
I-3	0.0
I-t	0.0
IFT57	0.0
IM1	0.0
IM18	0.0
IM2	0.0
IM23	0.0
IMPPP	0.0
Idgf5	0.0
Ilp1	0.0
Ilp2	0.0
Ilp3	0.0
Ilp4	0.0
Ilp5	0.0
ImpE2	0.0
Indy-2	0.0
Ir10a	0.0
Ir11a	0.0
Ir20a	0.0
Ir48b	0.0
Ir48c	0.0
Ir52a	0.0
Ir52b	0.0
Ir52d	0.0
Ir56a	0.0
Ir60a	0.0
Ir60d	0.0
Ir64a	0.0
Ir67a	0.0
Ir68b	0.0
Ir75c	0.0
Ir75d	0.0
Ir7a	0.0
Ir85a	0.0
Ir92a	0.0
Ir93a	0.0
Ir94a	0.0
Ir94b	0.0
Ir94c	0.0
Ir94d	0.0
Ir94e	0.0
Ir94g	0.0
Ir94h	0.0
Jon65Aii	0.0
Jon66Ci	0.0
Jon66Cii	0.0
KP78a	0.0
KP78b	0.0
Klf15	0.0
Klp59C	0.0
LManIV	0.0
LS2	0.0
LSm-4	0.0
Lasp	0.0
Lcp1	0.0
Lcp2	0.0
Lcp3	0.0
Lcp4	0.0
Lcp65Aa	0.0
Lcp65Ab1	0.0
Lcp65Ab2	0.0
Lcp65Ac	0.0
Lcp65Ad	0.0
Lcp65Ae	0.0
Lcp65Af	0.0
Lcp65Ag1	0.0
Lcp65Ag3	0.0
Lgr4	0.0
Lip1	0.0
Lip2	0.0
Lip3	0.0
Lk	0.0
LysB	0.0
LysP	0.0
MED9	0.0
MESK4	0.0
Mal-A4	0.0
Mal-A7	0.0
Menl-1	0.0
Menl-2	0.0
Met75Ca	0.0
Met75Cb	0.0
Mip	0.0
Mocs2	0.0
Ms	0.0
MsR1	0.0
Mst33A	0.0
Mst57Da	0.0
Mst77Y-13	0.0
Mst77Y-4	0.0
Mst77Y-7	0.0
Mst77Y-9	0.0
Mst84Db	0.0
Mst84Dd	0.0
MstProx	0.0
Mtk	0.0
MtnD	0.0
Muc18B	0.0
Muc55B	0.0
Muc91C	0.0
Mur89F	0.0
Muted	0.0
ND-20L	0.0
ND-B14.5AL	0.0
ND-B8	0.0
ND-MNLL	0.0
NPF	0.0
NijB	0.0
NimB1	0.0
NimB3	0.0
NimC3	0.0
Nlg4	0.0
Np	0.0
Npc1b	0.0
Npc2c	0.0
Nplp1	0.0
Nplp3	0.0
ORY	0.0
OS9	0.0
Obp22a	0.0
Obp46a	0.0
Obp47a	0.0
Obp50a	0.0
Obp50b	0.0
Obp50c	0.0
Obp50d	0.0
Obp50e	0.0
Obp51a	0.0
Obp56a	0.0
Obp56b	0.0
Obp56f	0.0
Obp56h	0.0
Obp56i	0.0
Obp57c	0.0
Obp57d	0.0
Obp58b	0.0
Obp58c	0.0
Obp58d	0.0
Obp73a	0.0
Obp83a	0.0
Obp83b	0.0
Obp83cd	0.0
Obp83ef	0.0
Obp83g	0.0
Obp84a	0.0
Obp8a	0.0
Obp93a	0.0
Ocho	0.0
Odc1	0.0
Odc2	0.0
OdsH	0.0
Oli	0.0
Optix	0.0
Or10a	0.0
Or13a	0.0
Or19a	0.0
Or19b	0.0
Or1a	0.0
Or22a	0.0
Or22b	0.0
Or22c	0.0
Or23a	0.0
Or30a	0.0
Or33a	0.0
Or33b	0.0
Or33c	0.0
Or35a	0.0
Or42a	0.0
Or42b	0.0
Or45a	0.0
Or47a	0.0
Or47b	0.0
Or49a	0.0
Or49b	0.0
Or56a	0.0
Or59a	0.0
Or59b	0.0
Or59c	0.0
Or63a	0.0
Or65a	0.0
Or65b	0.0
Or65c	0.0
Or67a	0.0
Or67c	0.0
Or67d	0.0
Or69a	0.0
Or74a	0.0
Or83a	0.0
Or83c	0.0
Or85c	0.0
Or85d	0.0
Or85e	0.0
Or85f	0.0
Or88a	0.0
Or92a	0.0
Or94a	0.0
Or94b	0.0
Or98a	0.0
Orc3	0.0
Orco	0.0
Osi10	0.0
Osi11	0.0
Osi12	0.0
Osi14	0.0
Osi15	0.0
Osi18	0.0
Osi21	0.0
Osi22	0.0
Osi3	0.0
Osi5	0.0
Osi6	0.0
Osi7	0.0
Osi8	0.0
Osi9	0.0
PGRP-SB1	0.0
PGRP-SB2	0.0
PGRP-SC1a	0.0
PGRP-SC1b	0.0
PH4alphaMP	0.0
PH4alphaSG1	0.0
PK1-R	0.0
PK2-R1	0.0
PK2-R2	0.0
PPO1	0.0
PPO2	0.0
PPYR1	0.0
PRY	0.0
PVRAP	0.0
Pbp49	0.0
Pburs	0.0
Pcp	0.0
Pdf	0.0
Pepck	0.0
Pgam5-2	0.0
Pglym87	0.0
Pif1B	0.0
Pif2	0.0
Pig1	0.0
Pk34A	0.0
Poxn	0.0
Pp1-Y1	0.0
Pp1-Y2	0.0
PpD5	0.0
PpN58A	0.0
PpY-55A	0.0
Ppcdc	0.0
Ppr-Y	0.0
Prosalpha1	0.0
Prosalpha3T	0.0
Prosalpha4T1	0.0
Prosalpha4T2	0.0
Prosbeta4R1	0.0
Prosbeta4R2	0.0
Prosbeta5R1	0.0
Prosbeta5R2	0.0
ProtA	0.0
ProtB	0.0
Prtl99C	0.0
Prx5	0.0
RYa	0.0
Rab9Db	0.0
Rab9Fa	0.0
Rab9Fb	0.0
RabX2	0.0
RabX5	0.0
RacGAP84C	0.0
Rad1	0.0
Ran-like	0.0
Rcd7	0.0
Rdl	0.0
Ref2	0.0
Ret	0.0
Rh3	0.0
RpL10Aa	0.0
RpL7-like	0.0
RpS28a	0.0
Rpb4	0.0
Rpp20	0.0
RunxA	0.0
RunxB	0.0
Rx	0.0
SIFa	0.0
SLIRP1	0.0
SNCF	0.0
SP	0.0
SP555	0.0
ST6Gal	0.0
Sardh	0.0
Sb	0.0
SclA	0.0
SclB	0.0
SdhAL	0.0
Sdic4	0.0
Semp1	0.0
Sems	0.0
Send1	0.0
Ser12	0.0
Ser6	0.0
Ser8	0.0
SerT	0.0
Sfp23F	0.0
Sfp24Ba	0.0
Sfp24Bb	0.0
Sfp24Bc	0.0
Sfp24Bd	0.0
Sfp24C1	0.0
Sfp26Ac	0.0
Sfp33A1	0.0
Sfp33A2	0.0
Sfp33A3	0.0
Sfp33A4	0.0
Sfp35C	0.0
Sfp36F	0.0
Sfp38D	0.0
Sfp51E	0.0
Sfp65A	0.0
Sfp70A4	0.0
Sfp77F	0.0
Sfp78E	0.0
Sfp87B	0.0
Sfp93F	0.0
Sfp96F	0.0
Sgs1	0.0
Sgs5	0.0
Shawl	0.0
Shawn	0.0
Sidpn	0.0
Skadu	0.0
SkpF	0.0
SmydA-9	0.0
Snapin	0.0
Snup	0.0
Sox21b	0.0
Sp1	0.0
Spn28B	0.0
Spn38F	0.0
Spn42Db	0.0
Spn75F	0.0
Sprn	0.0
Sr-CII	0.0
Sry-alpha	0.0
Sry-beta	0.0
St2	0.0
Ste:CG33236	0.0
Ste:CG33237	0.0
Ste:CG33238	0.0
Ste:CG33239	0.0
Ste:CG33240	0.0
Ste:CG33241	0.0
Ste:CG33242	0.0
Ste:CG33243	0.0
Ste:CG33244	0.0
Ste:CG33245	0.0
Ste:CG33247	0.0
Su(Ste):CR40820	0.0
Su(Ste):CR41533	0.0
Su(Ste):CR42406	0.0
Su(Ste):CR42407	0.0
Su(Ste):CR42408	0.0
Su(Ste):CR42409	0.0
Su(Ste):CR42410	0.0
Su(Ste):CR42411	0.0
Su(Ste):CR42412	0.0
Su(Ste):CR42414	0.0
Su(Ste):CR42415	0.0
Su(Ste):CR42416	0.0
Su(Ste):CR42417	0.0
Su(Ste):CR42418	0.0
Su(Ste):CR42419	0.0
Su(Ste):CR42420	0.0
Su(Ste):CR42421	0.0
Su(Ste):CR42422	0.0
Su(Ste):CR42424	0.0
Su(Ste):CR42425	0.0
Su(Ste):CR42426	0.0
Su(Ste):CR42427	0.0
Su(Ste):CR42428	0.0
Su(Ste):CR42429	0.0
Su(Ste):CR42430	0.0
Su(Ste):CR42431	0.0
Su(Ste):CR42432	0.0
Su(Ste):CR42433	0.0
Su(Ste):CR42438	0.0
Su(Ste):CR42439	0.0
Su(Ste):CR42444	0.0
Su(Ste):CR45794	0.0
Su(Ste):CR45795	0.0
Su(Ste):CR45796	0.0
SuUR	0.0
Sws1	0.0
Tango8	0.0
Tb	0.0
Tektin-A	0.0
Tengl3	0.0
Tengl4	0.0
TfAP-2	0.0
Tfb5	0.0
Tgs1	0.0
Tim10	0.0
Tim17b2	0.0
Tim9b	0.0
Tk	0.0
TkR99D	0.0
Toll-4	0.0
Toll-6	0.0
TotC	0.0
TotF	0.0
TotX	0.0
Tpl94D	0.0
Trh	0.0
Trissin	0.0
TrpA1	0.0
Trpml	0.0
Trxr-2	0.0
Tsp42A	0.0
Tsp42Eb	0.0
Tsp66A	0.0
Tsp68C	0.0
TwdlB	0.0
TwdlD	0.0
TwdlK	0.0
TwdlL	0.0
TwdlN	0.0
TwdlO	0.0
TwdlP	0.0
TwdlQ	0.0
TwdlR	0.0
TwdlS	0.0
TwdlT	0.0
TwdlV	0.0
TwdlY	0.0
TwdlZ	0.0
Twdlalpha	0.0
Tyler	0.0
UQCR-14L	0.0
Ubc87F	0.0
Ubx	0.0
Uch-L5R	0.0
Ugt37c1	0.0
VAChT	0.0
VGAT	0.0
VGlut	0.0
VepD	0.0
Vha100-3	0.0
Vha14-2	0.0
Vha16-2	0.0
Vha16-4	0.0
Vha16-5	0.0
Vha36-2	0.0
VhaM9.7-d	0.0
Victoria	0.0
Vkor	0.0
WDY	0.0
Wnt10	0.0
Xport-A	0.0
Xport-B	0.0
Yu	0.0
Zasp67	0.0
Zip42C.1	0.0
Zip42C.2	0.0
a5	0.0
ac	0.0
acj6	0.0
al	0.0
alphaTub85E	0.0
aly	0.0
amon	0.0
antdh	0.0
aqrs	0.0
ase	0.0
ato	0.0
att-ORFB	0.0
azot	0.0
ban	0.0
bap	0.0
beat-IIIa	0.0
beat-IIIb	0.0
beat-IV	0.0
beat-VII	0.0
beat-Vb	0.0
beat-Vc	0.0
betaNACtes1	0.0
betaNACtes2	0.0
bft	0.0
bnk	0.0
boil	0.0
brv2	0.0
bxd	0.0
cato	0.0
caup	0.0
cola	0.0
cup	0.0
d-cup	0.0
dan	0.0
deltaTry	0.0
dmrt11E	0.0
dmrt99B	0.0
dpr11	0.0
dpr15	0.0
dpr16	0.0
dpr3	0.0
dpr4	0.0
dpr5	0.0
dsf	0.0
dyl	0.0
eIF4E-4	0.0
ems	0.0
epsilonTry	0.0
erm	0.0
etaTry	0.0
fab1	0.0
fau	0.0
fd19B	0.0
fd96Ca	0.0
fd96Cb	0.0
fid	0.0
fit	0.0
fln	0.0
fne	0.0
frac	0.0
frc	0.0
frma	0.0
ftz	0.0
gammaTry	0.0
gcm2	0.0
gdl-ORF39	0.0
grim	0.0
grn	0.0
gsb	0.0
h-cup	0.0
hale	0.0
halo	0.0
hbn	0.0
hemo	0.0
hkb	0.0
hmw	0.0
hubl	0.0
hui	0.0
igl	0.0
inaC	0.0
inaF-B	0.0
inaF-C	0.0
ind	0.0
intr	0.0
iotaTry	0.0
jb	0.0
jeb	0.0
kappaB-Ras	0.0
kek3	0.0
kl-2	0.0
kl-3	0.0
kl-5	0.0
klhl10	0.0
knrl	0.0
l(1)sc	0.0
l(3)mbn	0.0
laf	0.0
lambdaTry	0.0
lbe	0.0
lbl	0.0
lcs	0.0
lectin-21Cb	0.0
lectin-30A	0.0
let-7	0.0
lmgA	0.0
lmgB	0.0
lms	0.0
lobo	0.0
lox2	0.0
lush	0.0
mAChR-B	0.0
mAChR-C	0.0
mRpL53	0.0
mei-217	0.0
mey	0.0
mir-1	0.0
mir-10	0.0
mir-100	0.0
mir-1000	0.0
mir-1001	0.0
mir-1002	0.0
mir-1003	0.0
mir-1004	0.0
mir-1005	0.0
mir-1006	0.0
mir-1007	0.0
mir-1008	0.0
mir-1009	0.0
mir-1010	0.0
mir-1011	0.0
mir-1012	0.0
mir-1013	0.0
mir-1014	0.0
mir-1015	0.0
mir-1016	0.0
mir-1017	0.0
mir-124	0.0
mir-125	0.0
mir-133	0.0
mir-137	0.0
mir-13a	0.0
mir-13b-1	0.0
mir-13b-2	0.0
mir-14	0.0
mir-184	0.0
mir-193	0.0
mir-210	0.0
mir-219	0.0
mir-2280	0.0
mir-2489	0.0
mir-2490	0.0
mir-2494	0.0
mir-2495	0.0
mir-2497	0.0
mir-2498	0.0
mir-2499	0.0
mir-2500	0.0
mir-2501	0.0
mir-252	0.0
mir-2535b	0.0
mir-263b	0.0
mir-274	0.0
mir-275	0.0
mir-276a	0.0
mir-276b	0.0
mir-277	0.0
mir-278	0.0
mir-279	0.0
mir-280	0.0
mir-281-1	0.0
mir-281-2	0.0
mir-282	0.0
mir-284	0.0
mir-285	0.0
mir-286	0.0
mir-287	0.0
mir-288	0.0
mir-289	0.0
mir-2b-1	0.0
mir-2c	0.0
mir-3	0.0
mir-303	0.0
mir-306	0.0
mir-307a	0.0
mir-307b	0.0
mir-309	0.0
mir-310	0.0
mir-311	0.0
mir-312	0.0
mir-313	0.0
mir-314	0.0
mir-315	0.0
mir-316	0.0
mir-31a	0.0
mir-31b	0.0
mir-34	0.0
mir-3641	0.0
mir-3642	0.0
mir-3643	0.0
mir-3644	0.0
mir-375	0.0
mir-4	0.0
mir-4908	0.0
mir-4909	0.0
mir-4910	0.0
mir-4911	0.0
mir-4912	0.0
mir-4913	0.0
mir-4914	0.0
mir-4915	0.0
mir-4916	0.0
mir-4917	0.0
mir-4918	0.0
mir-4919	0.0
mir-4939	0.0
mir-4940	0.0
mir-4941	0.0
mir-4942	0.0
mir-4944	0.0
mir-4945	0.0
mir-4946	0.0
mir-4947	0.0
mir-4949	0.0
mir-4950	0.0
mir-4951	0.0
mir-4952	0.0
mir-4956	0.0
mir-4957	0.0
mir-4958	0.0
mir-4959	0.0
mir-4960	0.0
mir-4961	0.0
mir-4963	0.0
mir-4964	0.0
mir-4966-1	0.0
mir-4969	0.0
mir-4970	0.0
mir-4971	0.0
mir-4973	0.0
mir-4976	0.0
mir-4977	0.0
mir-4981	0.0
mir-4983	0.0
mir-4986	0.0
mir-4987	0.0
mir-5	0.0
mir-6-1	0.0
mir-6-2	0.0
mir-6-3	0.0
mir-8	0.0
mir-87	0.0
mir-927	0.0
mir-929	0.0
mir-92a	0.0
mir-92b	0.0
mir-932	0.0
mir-9369	0.0
mir-9370	0.0
mir-9371	0.0
mir-9372	0.0
mir-9373	0.0
mir-9374	0.0
mir-9375	0.0
mir-9380	0.0
mir-9381	0.0
mir-9383	0.0
mir-9384	0.0
mir-9385	0.0
mir-9388	0.0
mir-954	0.0
mir-955	0.0
mir-958	0.0
mir-959	0.0
mir-960	0.0
mir-961	0.0
mir-962	0.0
mir-963	0.0
mir-964	0.0
mir-965	0.0
mir-968	0.0
mir-969	0.0
mir-970	0.0
mir-971	0.0
mir-972	0.0
mir-973	0.0
mir-974	0.0
mir-975	0.0
mir-976	0.0
mir-977	0.0
mir-978	0.0
mir-979	0.0
mir-980	0.0
mir-981	0.0
mir-982	0.0
mir-983-1	0.0
mir-983-2	0.0
mir-984	0.0
mir-985	0.0
mir-987	0.0
mir-990	0.0
mir-991	0.0
mir-992	0.0
mir-993	0.0
mir-995	0.0
mir-996	0.0
mir-997-1	0.0
mir-9a	0.0
mir-9b	0.0
mir-9c	0.0
mir-iab-4	0.0
mir-iab-8	0.0
mkg-p	0.0
moi	0.0
ms(2)35Ci	0.0
ms(3)76Ca	0.0
ms(3)K81	0.0
mtTFB1	0.0
mthl12	0.0
mthl6	0.0
mthl8	0.0
mus312	0.0
nAChRalpha2	0.0
nAChRalpha5	0.0
nab	0.0
nau	0.0
ng1	0.0
ng2	0.0
ng3	0.0
ng4	0.0
nht	0.0
ninaC	0.0
nompA	0.0
nullo	0.0
nxf4	0.0
obst-F	0.0
obst-G	0.0
obst-I	0.0
obst-J	0.0
opa	0.0
ovm	0.0
p24-2	0.0
pb	0.0
pdm2	0.0
pncr002:3R	0.0
pncr015:3L	0.0
pncr017:3R	0.0
pnr	0.0
ppk11	0.0
ppk15	0.0
ppk16	0.0
ppk17	0.0
ppk7	0.0
ppk9	0.0
prc	0.0
pre-mod(mdg4)-AA	0.0
pre-mod(mdg4)-AB	0.0
pre-mod(mdg4)-AD	0.0
pre-mod(mdg4)-AE	0.0
pre-mod(mdg4)-B	0.0
pre-mod(mdg4)-C	0.0
pre-mod(mdg4)-E	0.0
pre-mod(mdg4)-G	0.0
pre-mod(mdg4)-H	0.0
pre-mod(mdg4)-I	0.0
pre-mod(mdg4)-J	0.0
pre-mod(mdg4)-K	0.0
pre-mod(mdg4)-L	0.0
pre-mod(mdg4)-N	0.0
pre-mod(mdg4)-O	0.0
pre-mod(mdg4)-P	0.0
pre-mod(mdg4)-T	0.0
pre-mod(mdg4)-U	0.0
pre-mod(mdg4)-V	0.0
pre-mod(mdg4)-W	0.0
pre-mod(mdg4)-X	0.0
pre-mod(mdg4)-Y	0.0
pre-mod(mdg4)-Z	0.0
pre-rRNA:CR45845	0.0
pre-rRNA:CR45846	0.0
pre-rRNA:CR45847	0.0
prim	0.0
primo-1	0.0
primo-2	0.0
resilin	0.0
retinin	0.0
rho-6	0.0
ro	0.0
robl22E	0.0
robl37BC	0.0
robo3	0.0
s-cup	0.0
sNPF	0.0
sa	0.0
sala	0.0
salr	0.0
scaRNA:MeU1b-A234	0.0
scaRNA:PsiU2-35.45	0.0
schuy	0.0
scrt	0.0
sens-2	0.0
seq	0.0
slp2	0.0
snRNA:U1:21D	0.0
snRNA:U1:95Ca	0.0
snRNA:U1:95Cb	0.0
snRNA:U2:34ABb	0.0
snRNA:U2:34ABc	0.0
snRNA:U2:38ABa	0.0
snRNA:U3:22A	0.0
snRNA:U5:35D	0.0
snRNA:U6:96Aa	0.0
snRNA:U6:96Ab	0.0
snRNA:U6:96Ac	0.0
snRNA:U6atac:29B	0.0
snmRNA:128	0.0
snmRNA:157	0.0
snmRNA:158	0.0
snmRNA:184	0.0
snmRNA:204	0.0
snmRNA:357	0.0
snmRNA:359	0.0
snmRNA:400	0.0
snmRNA:419	0.0
snmRNA:430:CR33727	0.0
snmRNA:430:CR33728	0.0
snmRNA:430:CR33729	0.0
snmRNA:430:CR33730	0.0
snmRNA:430:CR33731	0.0
snmRNA:430:CR33732	0.0
snmRNA:430:CR33733	0.0
snmRNA:430:CR33734	0.0
snmRNA:430:CR33735	0.0
snmRNA:430:CR33736	0.0
snmRNA:430:CR33737	0.0
snmRNA:430:CR33738	0.0
snmRNA:430:CR33739	0.0
snmRNA:430:CR33740	0.0
snmRNA:430:CR33741	0.0
snmRNA:430:CR33742	0.0
snmRNA:430:CR33743	0.0
snmRNA:430:CR33744	0.0
snmRNA:430:CR33745	0.0
snmRNA:430:CR33746	0.0
snmRNA:438	0.0
snmRNA:641	0.0
snmRNA:649	0.0
snmRNA:763	0.0
snmRNA:765	0.0
snmRNA:838	0.0
snoRNA:660	0.0
snoRNA:83E4-5	0.0
snoRNA:CD-24	0.0
snoRNA:CG16892-a	0.0
snoRNA:CG43051-a	0.0
snoRNA:Irbp-a	0.0
snoRNA:M	0.0
snoRNA:Me18S-A1061	0.0
snoRNA:Me18S-A1374	0.0
snoRNA:Me18S-A1494	0.0
snoRNA:Me18S-A1597	0.0
snoRNA:Me18S-A1806	0.0
snoRNA:Me18S-A425	0.0
snoRNA:Me18S-A469	0.0
snoRNA:Me18S-C1024	0.0
snoRNA:Me18S-G1952	0.0
snoRNA:Me18S-G393	0.0
snoRNA:Me18S-G423	0.0
snoRNA:Me18S-G642	0.0
snoRNA:Me18S-G894	0.0
snoRNA:Me18S-U1356a	0.0
snoRNA:Me18S-U1356b	0.0
snoRNA:Me18S-U1356c	0.0
snoRNA:Me28S-A1666a	0.0
snoRNA:Me28S-A1705	0.0
snoRNA:Me28S-A2486	0.0
snoRNA:Me28S-A2634c	0.0
snoRNA:Me28S-A774a	0.0
snoRNA:Me28S-A982a	0.0
snoRNA:Me28S-C2645a	0.0
snoRNA:Me28S-C2645b	0.0
snoRNA:Me28S-C2645c	0.0
snoRNA:Me28S-C3351	0.0
snoRNA:Me28S-C788a	0.0
snoRNA:Me28S-G1083a	0.0
snoRNA:Me28S-G1083b	0.0
snoRNA:Me28S-G1083c	0.0
snoRNA:Me28S-G1083d	0.0
snoRNA:Me28S-G2596	0.0
snoRNA:Me28S-G2703b	0.0
snoRNA:Me28S-G3113a	0.0
snoRNA:Me28S-G3113b	0.0
snoRNA:Me28S-G3255b	0.0
snoRNA:Me28S-G3277a	0.0
snoRNA:Me28S-G980	0.0
snoRNA:Me28S-U2134a	0.0
snoRNA:Me5.8S-G74	0.0
snoRNA:MeU2-A31	0.0
snoRNA:Or-CD11b	0.0
snoRNA:Or-CD11c	0.0
snoRNA:Or-CD9a	0.0
snoRNA:Or-CD9b	0.0
snoRNA:Or-aca2	0.0
snoRNA:Psi18S-525c	0.0
snoRNA:Psi18S-640a	0.0
snoRNA:Psi18S-640c	0.0
snoRNA:Psi28S-1153	0.0
snoRNA:Psi28S-2263	0.0
snoRNA:U29:54Ec	0.0
snoRNA:U31:54Eb	0.0
snoRNA:U31:54Ed	0.0
snoRNA:U3:54Aa	0.0
snoRNA:U3:54Ab	0.0
snoRNA:abba-a	0.0
snoRNA:snR38:54Eb	0.0
sowi	0.0
spab	0.0
spag4	0.0
spaw	0.0
sphinx1	0.0
sphinx2	0.0
spirit	0.0
ssp2	0.0
ssp5	0.0
stg1	0.0
stnA	0.0
stnB	0.0
sunz	0.0
sut4	0.0
svp	0.0
swif	0.0
tal-1A	0.0
tal-2A	0.0
tal-3A	0.0
tal-AA	0.0
tectonic	0.0
thetaTry	0.0
tll	0.0
to	0.0
toe	0.0
tomboy20	0.0
trv	0.0
tsg	0.0
ttm3	0.0
tup	0.0
twi	0.0
verm	0.0
vnc	0.0
vnd	0.0
w-cup	0.0
wa-cup	0.0
waw	0.0
wntD	0.0
wor	0.0
wry	0.0
wuc	0.0
yar	0.0
yellow-d2	0.0
yellow-e2	0.0
yellow-e3	0.0
zen2	0.0
zetaTry	0.0
Amnionless	0.35192889522541665
Art2	0.35192889522541665
CCHa1-R	0.35192889522541665
CG10694	0.35192889522541665
CG11145	0.35192889522541665
CG11291	0.35192889522541665
CG12003	0.35192889522541665
CG12506	0.35192889522541665
CG12699	0.35192889522541665
CG12836	0.35192889522541665
CG13607	0.35192889522541665
CG1368	0.35192889522541665
CG13837	0.35192889522541665
CG14384	0.35192889522541665
CG14506	0.35192889522541665
CG15127	0.35192889522541665
CG1688	0.35192889522541665
CG18132	0.35192889522541665
CG18294	0.35192889522541665
CG18368	0.35192889522541665
CG2127	0.35192889522541665
CG2839	0.35192889522541665
CG30033	0.35192889522541665
CG30384	0.35192889522541665
CG3062	0.35192889522541665
CG31323	0.35192889522541665
CG31871	0.35192889522541665
CG32121	0.35192889522541665
CG32563	0.35192889522541665
CG3339	0.35192889522541665
CG33640	0.35192889522541665
CG33922	0.35192889522541665
CG33965	0.35192889522541665
CG34038	0.35192889522541665
CG34114	0.35192889522541665
CG34215	0.35192889522541665
CG34281	0.35192889522541665
CG34437	0.35192889522541665
CG42449	0.35192889522541665
CG42581	0.35192889522541665
CG42766	0.35192889522541665
CG42779	0.35192889522541665
CG43091	0.35192889522541665
CG43114	0.35192889522541665
CG43245	0.35192889522541665
CG43348	0.35192889522541665
CG43993	0.35192889522541665
CG44174	0.35192889522541665
CG4962	0.35192889522541665
CG5043	0.35192889522541665
CG5122	0.35192889522541665
CG5204	0.35192889522541665
CG5895	0.35192889522541665
CG6244	0.35192889522541665
CG7551	0.35192889522541665
CG8138	0.35192889522541665
CR43243	0.35192889522541665
CR43607	0.35192889522541665
CR43624	0.35192889522541665
CR43820	0.35192889522541665
CR43830	0.35192889522541665
CR43974	0.35192889522541665
CR44023	0.35192889522541665
CR44130	0.35192889522541665
CR44256	0.35192889522541665
CR44416	0.35192889522541665
CR44467	0.35192889522541665
CR44567	0.35192889522541665
CR44587	0.35192889522541665
CR44594	0.35192889522541665
CR44640	0.35192889522541665
CR44754	0.35192889522541665
CR44760	0.35192889522541665
CR44941	0.35192889522541665
CR44959	0.35192889522541665
CR44975	0.35192889522541665
CR45045	0.35192889522541665
CR45136	0.35192889522541665
CR45168	0.35192889522541665
CR45223	0.35192889522541665
CR45321	0.35192889522541665
CR45384	0.35192889522541665
CR45437	0.35192889522541665
CR45478	0.35192889522541665
CR45642	0.35192889522541665
CR45662	0.35192889522541665
CR45812	0.35192889522541665
Ccp84Ad	0.35192889522541665
Cpr67Fa2	0.35192889522541665
Cyp4ac1	0.35192889522541665
Cyp6t3	0.35192889522541665
Doc2	0.35192889522541665
Gr98d	0.35192889522541665
Gyc89Db	0.35192889522541665
Hex-t1	0.35192889522541665
Hr83	0.35192889522541665
Inx6	0.35192889522541665
Lcp65Ag2	0.35192889522541665
Lim3	0.35192889522541665
Nplp4	0.35192889522541665
Or82a	0.35192889522541665
Osi16	0.35192889522541665
PHDP	0.35192889522541665
Pdh	0.35192889522541665
Rab9E	0.35192889522541665
Rh2	0.35192889522541665
SIFaR	0.35192889522541665
Send2	0.35192889522541665
Ser7	0.35192889522541665
Spn43Aa	0.35192889522541665
TwdlM	0.35192889522541665
Ugt86Dg	0.35192889522541665
aust	0.35192889522541665
betaNACtes3	0.35192889522541665
danr	0.35192889522541665
hig	0.35192889522541665
hll	0.35192889522541665
mir-308	0.35192889522541665
nerfin-2	0.35192889522541665
ppk8	0.35192889522541665
rib	0.35192889522541665
snoRNA:Me28S-G2743	0.35192889522541665
snoRNA:Me28S-U3344a	0.35192889522541665
spok	0.35192889522541665
ste24c	0.35192889522541665
tap	0.35192889522541665
tbrd-3	0.35192889522541665
unc80	0.35192889522541665
CG11413	0.48179106109172665
CG12009	0.48179106109172665
CG12502	0.48179106109172665
CG14113	0.48179106109172665
CG15293	0.48179106109172665
CG30441	0.48179106109172665
CG31468	0.48179106109172665
CG32071	0.48179106109172665
CG32392	0.48179106109172665
CG34227	0.48179106109172665
CG34452	0.48179106109172665
CG42579	0.48179106109172665
CG42810	0.48179106109172665
CG42866	0.48179106109172665
CG43251	0.48179106109172665
CG4377	0.48179106109172665
CG46298	0.48179106109172665
CG4970	0.48179106109172665
CG6628	0.48179106109172665
CG7907	0.48179106109172665
CG9507	0.48179106109172665
CG9782	0.48179106109172665
CR43410	0.48179106109172665
CR44284	0.48179106109172665
CR44431	0.48179106109172665
CR44590	0.48179106109172665
CR44592	0.48179106109172665
CR44849	0.48179106109172665
CR44915	0.48179106109172665
CR44926	0.48179106109172665
CR45278	0.48179106109172665
CR45500	0.48179106109172665
CR45609	0.48179106109172665
CR45637	0.48179106109172665
CR45961	0.48179106109172665
CR46101	0.48179106109172665
CR46214	0.48179106109172665
Cpr56F	0.48179106109172665
Dic61B	0.48179106109172665
ImpL1	0.48179106109172665
Obp99d	0.48179106109172665
Ste:CG33246	0.48179106109172665
Vha16-3	0.48179106109172665
dpr12	0.48179106109172665
iab-4	0.48179106109172665
ppk25	0.48179106109172665
ppk30	0.48179106109172665
term	0.48179106109172665
CG10317	0.5313969797059334
CG13064	0.5313969797059334
CG14302	0.5313969797059334
CG14840	0.5313969797059334
CG16854	0.5313969797059334
CG32212	0.5313969797059334
CG32783	0.5313969797059334
CG33958	0.5313969797059334
CG42288	0.5313969797059334
CG43093	0.5313969797059334
CG44013	0.5313969797059334
CG7294	0.5313969797059334
CR44453	0.5313969797059334
CR44504	0.5313969797059334
CR44867	0.5313969797059334
Cpr65Ay	0.5313969797059334
Mst77F	0.5313969797059334
Unc-115b	0.5313969797059334
ninaB	0.5313969797059334
snoRNA:Or-CD11a	0.5313969797059334
snoRNA:U14:30Eb	0.5313969797059334
5-HT1A	0.7038577904508333
Acp76A	0.7038577904508333
BBS1	0.7038577904508333
CG10232	0.7038577904508333
CG11668	0.7038577904508333
CG12158	0.7038577904508333
CG12477	0.7038577904508333
CG13044	0.7038577904508333
CG13361	0.7038577904508333
CG13428	0.7038577904508333
CG13455	0.7038577904508333
CG13460	0.7038577904508333
CG13622	0.7038577904508333
CG13725	0.7038577904508333
CG13748	0.7038577904508333
CG14044	0.7038577904508333
CG14082	0.7038577904508333
CG14110	0.7038577904508333
CG1441	0.7038577904508333
CG14457	0.7038577904508333
CG14610	0.7038577904508333
CG14778	0.7038577904508333
CG14984	0.7038577904508333
CG15480	0.7038577904508333
CG15530	0.7038577904508333
CG15576	0.7038577904508333
CG16800	0.7038577904508333
CG16885	0.7038577904508333
CG17189	0.7038577904508333
CG17190	0.7038577904508333
CG17601	0.7038577904508333
CG30053	0.7038577904508333
CG30222	0.7038577904508333
CG30280	0.7038577904508333
CG30375	0.7038577904508333
CG31099	0.7038577904508333
CG3117	0.7038577904508333
CG31664	0.7038577904508333
CG32225	0.7038577904508333
CG32240	0.7038577904508333
CG32683	0.7038577904508333
CG33160	0.7038577904508333
CG33630	0.7038577904508333
CG33645	0.7038577904508333
CG33654	0.7038577904508333
CG33721	0.7038577904508333
CG33775	0.7038577904508333
CG34051	0.7038577904508333
CG34225	0.7038577904508333
CG34290	0.7038577904508333
CG34354	0.7038577904508333
CG34386	0.7038577904508333
CG3513	0.7038577904508333
CG3557	0.7038577904508333
CG3841	0.7038577904508333
CG4073	0.7038577904508333
CG42650	0.7038577904508333
CG42688	0.7038577904508333
CG43057	0.7038577904508333
CG43192	0.7038577904508333
CG43325	0.7038577904508333
CG4335	0.7038577904508333
CG43742	0.7038577904508333
CG44088	0.7038577904508333
CG45061	0.7038577904508333
CG4712	0.7038577904508333
CG4847	0.7038577904508333
CG6592	0.7038577904508333
CG7299	0.7038577904508333
CG7311	0.7038577904508333
CG7557	0.7038577904508333
CG8012	0.7038577904508333
CG8213	0.7038577904508333
CG8245	0.7038577904508333
CG9368	0.7038577904508333
CR43405	0.7038577904508333
CR43411	0.7038577904508333
CR43428	0.7038577904508333
CR43466	0.7038577904508333
CR43606	0.7038577904508333
CR43632	0.7038577904508333
CR43751	0.7038577904508333
CR43786	0.7038577904508333
CR43808	0.7038577904508333
CR44103	0.7038577904508333
CR44235	0.7038577904508333
CR44265	0.7038577904508333
CR44266	0.7038577904508333
CR44293	0.7038577904508333
CR44365	0.7038577904508333
CR44508	0.7038577904508333
CR44540	0.7038577904508333
CR44541	0.7038577904508333
CR44596	0.7038577904508333
CR44702	0.7038577904508333
CR44739	0.7038577904508333
CR44740	0.7038577904508333
CR44741	0.7038577904508333
CR44778	0.7038577904508333
CR44928	0.7038577904508333
CR45214	0.7038577904508333
CR45342	0.7038577904508333
CR45434	0.7038577904508333
CR45468	0.7038577904508333
CR45502	0.7038577904508333
CR45541	0.7038577904508333
CR45553	0.7038577904508333
CR45565	0.7038577904508333
CR45590	0.7038577904508333
CR45632	0.7038577904508333
CR45641	0.7038577904508333
CR45686	0.7038577904508333
CR45937	0.7038577904508333
CR45997	0.7038577904508333
CR46023	0.7038577904508333
CR46071	0.7038577904508333
CR46114	0.7038577904508333
CR46261	0.7038577904508333
CheB38c	0.7038577904508333
Cyp313a5	0.7038577904508333
Drsl4	0.7038577904508333
Edg78E	0.7038577904508333
Elo68beta	0.7038577904508333
Fer2	0.7038577904508333
GluRIIB	0.7038577904508333
Hdc	0.7038577904508333
IM3	0.7038577904508333
Kaz-m1	0.7038577904508333
MRE23	0.7038577904508333
Or85b	0.7038577904508333
Pmi	0.7038577904508333
Rab9D	0.7038577904508333
Sox21a	0.7038577904508333
TotZ	0.7038577904508333
TwdlG	0.7038577904508333
Vsx2	0.7038577904508333
b6	0.7038577904508333
beat-IIa	0.7038577904508333
brv3	0.7038577904508333
dpr10	0.7038577904508333
eg	0.7038577904508333
en	0.7038577904508333
glob3	0.7038577904508333
lectin-29Ca	0.7038577904508333
lectin-46Cb	0.7038577904508333
mas	0.7038577904508333
mir-79	0.7038577904508333
natalisin	0.7038577904508333
ort	0.7038577904508333
phyl	0.7038577904508333
ppk24	0.7038577904508333
rad	0.7038577904508333
run	0.7038577904508333
salm	0.7038577904508333
sens	0.7038577904508333
slou	0.7038577904508333
snoRNA:Me28S-A2589a	0.7038577904508333
snoRNA:U27:54Eb	0.7038577904508333
snoRNA:U31:54Ec	0.7038577904508333
snoRNA:nop5-x16-a	0.7038577904508333
spheroide	0.7038577904508333
unpg	0.7038577904508333
CG13067	0.8337199563171432
nAChRalpha6	0.8337199563171432
CR44704	0.8833258749313501
SteXh:CG42398	0.8833258749313501
CG10252	0.9635821221834533
CG11018	0.9635821221834533
CG11068	0.9635821221834533
CG12590	0.9635821221834533
CG12684	0.9635821221834533
CG13728	0.9635821221834533
CG13947	0.9635821221834533
CG14515	0.9635821221834533
CG14797	0.9635821221834533
CG14989	0.9635821221834533
CG15262	0.9635821221834533
CG15322	0.9635821221834533
CG1690	0.9635821221834533
CG2574	0.9635821221834533
CG2663	0.9635821221834533
CG3124	0.9635821221834533
CG32333	0.9635821221834533
CG32726	0.9635821221834533
CG34190	0.9635821221834533
CG43169	0.9635821221834533
CG43319	0.9635821221834533
CG44271	0.9635821221834533
CG6052	0.9635821221834533
CG6885	0.9635821221834533
CG9072	0.9635821221834533
CR42696	0.9635821221834533
CR43838	0.9635821221834533
CR44350	0.9635821221834533
CR44657	0.9635821221834533
CR44829	0.9635821221834533
CR45128	0.9635821221834533
CR45617	0.9635821221834533
CR45929	0.9635821221834533
CR46081	0.9635821221834533
CheA86a	0.9635821221834533
Cpr47Eg	0.9635821221834533
Cpr64Aa	0.9635821221834533
Ir60e	0.9635821221834533
Mkp	0.9635821221834533
alpha4GT2	0.9635821221834533
dy	0.9635821221834533
ppk21	0.9635821221834533
CR44318	1.01318804079766
Tom	1.01318804079766
Acp32CD	1.0557866856762501
Acp53C14c	1.0557866856762501
AkhR	1.0557866856762501
Alp1	1.0557866856762501
CCKLR-17D3	1.0557866856762501
CG10510	1.0557866856762501
CG10899	1.0557866856762501
CG11073	1.0557866856762501
CG11159	1.0557866856762501
CG12133	1.0557866856762501
CG12420	1.0557866856762501
CG12661	1.0557866856762501
CG12824	1.0557866856762501
CG13008	1.0557866856762501
CG13026	1.0557866856762501
CG13068	1.0557866856762501
CG13283	1.0557866856762501
CG13449	1.0557866856762501
CG13950	1.0557866856762501
CG14125	1.0557866856762501
CG14147	1.0557866856762501
CG14154	1.0557866856762501
CG14383	1.0557866856762501
CG14423	1.0557866856762501
CG14718	1.0557866856762501
CG15068	1.0557866856762501
CG15824	1.0557866856762501
CG15880	1.0557866856762501
CG16782	1.0557866856762501
CG16998	1.0557866856762501
CG17350	1.0557866856762501
CG17562	1.0557866856762501
CG17564	1.0557866856762501
CG18557	1.0557866856762501
CG18747	1.0557866856762501
CG30158	1.0557866856762501
CG30161	1.0557866856762501
CG30177	1.0557866856762501
CG30184	1.0557866856762501
CG30411	1.0557866856762501
CG31016	1.0557866856762501
CG31200	1.0557866856762501
CG31371	1.0557866856762501
CG31413	1.0557866856762501
CG31528	1.0557866856762501
CG31760	1.0557866856762501
CG31913	1.0557866856762501
CG32459	1.0557866856762501
CG3292	1.0557866856762501
CG33461	1.0557866856762501
CG33643	1.0557866856762501
CG33644	1.0557866856762501
CG33927	1.0557866856762501
CG33966	1.0557866856762501
CG34206	1.0557866856762501
CG34264	1.0557866856762501
CG34274	1.0557866856762501
CG34429	1.0557866856762501
CG4000	1.0557866856762501
CG40486	1.0557866856762501
CG42486	1.0557866856762501
CG43063	1.0557866856762501
CG43092	1.0557866856762501
CG43137	1.0557866856762501
CG43337	1.0557866856762501
CG44038	1.0557866856762501
CG45105	1.0557866856762501
CG46303	1.0557866856762501
CG4681	1.0557866856762501
CG5550	1.0557866856762501
CG5883	1.0557866856762501
CG6294	1.0557866856762501
CG6299	1.0557866856762501
CG6839	1.0557866856762501
CG7320	1.0557866856762501
CG7423	1.0557866856762501
CG7715	1.0557866856762501
CG8358	1.0557866856762501
CG8757	1.0557866856762501
CG9550	1.0557866856762501
CG9806	1.0557866856762501
CR43420	1.0557866856762501
CR43474	1.0557866856762501
CR43719	1.0557866856762501
CR43764	1.0557866856762501
CR43801	1.0557866856762501
CR43936	1.0557866856762501
CR43941	1.0557866856762501
CR44055	1.0557866856762501
CR44056	1.0557866856762501
CR44165	1.0557866856762501
CR44222	1.0557866856762501
CR44276	1.0557866856762501
CR44298	1.0557866856762501
CR44300	1.0557866856762501
CR44344	1.0557866856762501
CR44374	1.0557866856762501
CR44486	1.0557866856762501
CR44487	1.0557866856762501
CR44503	1.0557866856762501
CR44577	1.0557866856762501
CR44621	1.0557866856762501
CR44866	1.0557866856762501
CR44968	1.0557866856762501
CR45028	1.0557866856762501
CR45029	1.0557866856762501
CR45213	1.0557866856762501
CR45306	1.0557866856762501
CR45309	1.0557866856762501
CR45343	1.0557866856762501
CR45447	1.0557866856762501
CR45597	1.0557866856762501
CR45673	1.0557866856762501
CR45803	1.0557866856762501
CR45820	1.0557866856762501
CR45883	1.0557866856762501
CR45902	1.0557866856762501
CR46007	1.0557866856762501
CR46038	1.0557866856762501
CR46103	1.0557866856762501
CR46126	1.0557866856762501
CR46136	1.0557866856762501
CR46250	1.0557866856762501
Cpr62Ba	1.0557866856762501
Cyp318a1	1.0557866856762501
Cyp4ad1	1.0557866856762501
Drsl3	1.0557866856762501
Drsl5	1.0557866856762501
Fie	1.0557866856762501
Gr59a	1.0557866856762501
Gsc	1.0557866856762501
Lcch3	1.0557866856762501
LysS	1.0557866856762501
Oct-TyrR	1.0557866856762501
PGRP-SC2	1.0557866856762501
Sfp53D	1.0557866856762501
Sid	1.0557866856762501
SmydA-4	1.0557866856762501
Syt1	1.0557866856762501
Ugt86Dj	1.0557866856762501
dj	1.0557866856762501
fig	1.0557866856762501
kn	1.0557866856762501
l(2)k05911	1.0557866856762501
na	1.0557866856762501
oc	1.0557866856762501
rn	1.0557866856762501
snRNA:U4:25F	1.0557866856762501
snoRNA:Me28S-A2634a	1.0557866856762501
snoRNA:Me28S-U2134b	1.0557866856762501
snoRNA:Psi18S-525i	1.0557866856762501
snoRNA:U29:54Eb	1.0557866856762501
sxe2	1.0557866856762501
CG11162	1.0627939594118667
CG12522	1.0627939594118667
CG12964	1.0627939594118667
CG13646	1.0627939594118667
CG14854	1.0627939594118667
CG32440	1.0627939594118667
CG33626	1.0627939594118667
CG34244	1.0627939594118667
CG44475	1.0627939594118667
CG5768	1.0627939594118667
CG8673	1.0627939594118667
CG8736	1.0627939594118667
CR44501	1.0627939594118667
CR44773	1.0627939594118667
CR44850	1.0627939594118667
CR45421	1.0627939594118667
CR45717	1.0627939594118667
CR45818	1.0627939594118667
Cpr11B	1.0627939594118667
Obp56e	1.0627939594118667
Spn53F	1.0627939594118667
mir-7	1.0627939594118667
snoRNA:Me18S-G962	1.0627939594118667
Aplip1	1.1856488515425598
CG13168	1.1856488515425598
CG14342	1.1856488515425598
CG3588	1.1856488515425598
CR44834	1.1856488515425598
His1:CG33834	1.1856488515425598
loopin-1	1.1856488515425598
CG8888	1.2352547701567664
CR46070	1.2352547701567664
Gyc89Da	1.2352547701567664
CG33191	1.31551101740887
CR44970	1.31551101740887
btn	1.31551101740887
CR45152	1.3651169360230764
CG10339	1.4077155809016701
CG12480	1.4077155809016701
CG12540	1.4077155809016701
CG13324	1.4077155809016701
CG1339	1.4077155809016701
CG13743	1.4077155809016701
CG14269	1.4077155809016701
CG14456	1.4077155809016701
CG14645	1.4077155809016701
CG14770	1.4077155809016701
CG14933	1.4077155809016701
CG14958	1.4077155809016701
CG15208	1.4077155809016701
CG15450	1.4077155809016701
CG15517	1.4077155809016701
CG15554	1.4077155809016701
CG16732	1.4077155809016701
CG17211	1.4077155809016701
CG18031	1.4077155809016701
CG18420	1.4077155809016701
CG30385	1.4077155809016701
CG31493	1.4077155809016701
CG31752	1.4077155809016701
CG31819	1.4077155809016701
CG32532	1.4077155809016701
CG3264	1.4077155809016701
CG33309	1.4077155809016701
CG33463	1.4077155809016701
CG33703	1.4077155809016701
CG34124	1.4077155809016701
CG34263	1.4077155809016701
CG34303	1.4077155809016701
CG34460	1.4077155809016701
CG3734	1.4077155809016701
CG43123	1.4077155809016701
CG43702	1.4077155809016701
CG4465	1.4077155809016701
CG46026	1.4077155809016701
CG4613	1.4077155809016701
CG4783	1.4077155809016701
CG4927	1.4077155809016701
CG5334	1.4077155809016701
CG6660	1.4077155809016701
CG7025	1.4077155809016701
CG8006	1.4077155809016701
CG8141	1.4077155809016701
CG8586	1.4077155809016701
CR42755	1.4077155809016701
CR43713	1.4077155809016701
CR43754	1.4077155809016701
CR43887	1.4077155809016701
CR43956	1.4077155809016701
CR44057	1.4077155809016701
CR44113	1.4077155809016701
CR44221	1.4077155809016701
CR44224	1.4077155809016701
CR44237	1.4077155809016701
CR44363	1.4077155809016701
CR44466	1.4077155809016701
CR44471	1.4077155809016701
CR44536	1.4077155809016701
CR44606	1.4077155809016701
CR45123	1.4077155809016701
CR45151	1.4077155809016701
CR45335	1.4077155809016701
CR45570	1.4077155809016701
CR45659	1.4077155809016701
CR45866	1.4077155809016701
CR45901	1.4077155809016701
CR45966	1.4077155809016701
CR46251	1.4077155809016701
CR46263	1.4077155809016701
CheB74a	1.4077155809016701
Desi	1.4077155809016701
Dup99B	1.4077155809016701
E(spl)m6-BFM	1.4077155809016701
Gr98c	1.4077155809016701
ND-24L	1.4077155809016701
Proc	1.4077155809016701
Sp212	1.4077155809016701
Vha100-5	1.4077155809016701
Vsx1	1.4077155809016701
dysf	1.4077155809016701
mir-2b-2	1.4077155809016701
ninaD	1.4077155809016701
ninaG	1.4077155809016701
ppk26	1.4077155809016701
scaRNA:MeU2-G25	1.4077155809016701
scaRNA:MeU5-G38	1.4077155809016701
snRNA:U2:38ABb	1.4077155809016701
sna	1.4077155809016701
snoRNA:Psi28S-1837a	1.4077155809016701
tey	1.4077155809016701
tin	1.4077155809016701
CG13160	1.4147228546372832
CG15370	1.4147228546372832
CG9452	1.4147228546372832
CR43282	1.4147228546372832
a10	1.4147228546372832
AstC-R2	1.44537318327518
CG10140	1.44537318327518
CG10996	1.44537318327518
CG12817	1.44537318327518
CG1288	1.44537318327518
CG12914	1.44537318327518
CG13325	1.44537318327518
CG13476	1.44537318327518
CG14572	1.44537318327518
CG15577	1.44537318327518
CG17666	1.44537318327518
CG31226	1.44537318327518
CG31459	1.44537318327518
CG31740	1.44537318327518
CG42597	1.44537318327518
CG4701	1.44537318327518
CG6083	1.44537318327518
CG8065	1.44537318327518
CG9254	1.44537318327518
CG9395	1.44537318327518
CR44017	1.44537318327518
CR44041	1.44537318327518
CR44067	1.44537318327518
CR44556	1.44537318327518
CR44763	1.44537318327518
CR44871	1.44537318327518
CR44986	1.44537318327518
CR45327	1.44537318327518
CR45339	1.44537318327518
CR45868	1.44537318327518
CR46105	1.44537318327518
[truncated: 11,740 more rows]
