# Supplementary material
Source: publisher figshare collection journal article supplement (https://gsajournals.figshare.com/articles/dataset/_/26424277)
Supplement: Supplementary file 3 [file 1]

**Supplementary Table S6.** NDJ in *mei-W68* mutant females**A. Sex chromosome NDJ Frequencies :**

| Progeny:                                         | Regular |     | Exceptional |    |     |       |
|--------------------------------------------------|---------|-----|-------------|----|-----|-------|
| Maternal genotype                                | XX      | XY  | XXY         | XO | Nc  | %NDJ  |
| +/+                                              | 254     | 288 | 0           | 0  | 542 | 0     |
| <i>mei-W68<sup>1</sup> / Df<sup>27354</sup></i>  | 166     | 118 | 78          | 44 | 528 | 46.21 |
| <i>mei-W68<sup>CD</sup></i>                      | 236     | 220 | 44          | 38 | 620 | 26.45 |
| <i>mei-W68<sup>HA</sup></i>                      | 193     | 166 | 25          | 53 | 515 | 30.29 |
| <i>mei-W68<sup>HA</sup> / Df<sup>27354</sup></i> | 218     | 207 | 68          | 68 | 697 | 39.02 |
| <i>mei-W68<sup>HA</sup> / +</i>                  | 325     | 323 | 0           | 3  | 654 | 0.92  |
| <i>mei-P22</i>                                   | 197     | 209 | 44          | 41 | 576 | 29.51 |

Females with indicated second or third chromosome were crossed to *w/BsYy+* males. Surviving exceptional aneuploids are Bar-eyed *y/y/B<sup>S</sup>Y* females and wild-type *yw/O* males. Percentage of X-NDJ:  $100 \times 2(\text{X-NDJ progeny}) / \text{total progeny}$ , where total progeny (Nc) was calculated as  $2(\text{X-NDJ progeny}) + \text{regular progeny}$  (Gyuricza et al 2016)

**B. 2nd chromosome NDJ Frequencies :**

| Maternal genotype :                              | Diplo-2 | Null-2 | F1/n |
|--------------------------------------------------|---------|--------|------|
| +/+                                              | 0       | 0      | 0    |
| <i>mei-W68<sup>1</sup> / Df<sup>27354</sup></i>  | 103     | 42     | 3.62 |
| <i>mei-W68<sup>CD</sup></i>                      | 22      | 52     | 14.8 |
| <i>mei-W68<sup>HA</sup></i>                      | 84      | 73     | 7.85 |
| <i>mei-W68<sup>HA</sup> / Df<sup>27354</sup></i> | 55      | 35     | 4.5  |
| <i>mei-W68<sup>HA</sup> / +</i>                  | 0       | 0      | 0    |
| <i>mei-P22</i>                                   | 3       | 4      | 1.4  |

Females with indicated second or third chromosome were crossed to *C(2)EN b<sup>1</sup> pr<sup>1</sup>* males.

F1/n is the frequency of NDJ/total number of females crossed.
