# Supplementary material
Source: publisher figshare collection journal article supplement (https://gsajournals.figshare.com/articles/dataset/_/26424277)
Supplement: Supplementary file 5 [file 1]

**Supplementary Table S7. X-NDJ in females mutant for meiotic genes**

A. Sex chromosome NDJ :

| Progeny:                          | Regular |     | Exceptional |    |     |       |
|-----------------------------------|---------|-----|-------------|----|-----|-------|
| Maternal genotype                 | XX      | XY  | XXY         | X0 | Nc  | % NDJ |
| <i>nos&gt;sh-w</i>                | 393     | 169 | 0           | 1  | 564 | 0.35  |
| <i>nos&gt;sh-sunn</i>             | 322     | 313 | 29          | 24 | 741 | 14.30 |
| <i>nos&gt;sh-c(2)M</i>            | 172     | 157 | 15          | 15 | 389 | 15.42 |
| <i>nos&gt;sh-Nipped-B</i>         | 126     | 92  | 5           | 4  | 236 | 7.63  |
| <i>nos&gt;sh-SA-1<sup>a</sup></i> |         |     |             |    |     |       |

Indicated females were crossed to *w/BsYy+* males. Surviving exceptional aneuploids are Bar-eyed *y/y/B<sup>s</sup>Y* females and wild-type *yw/O* males

Percentage of X-NDJ:  $100 \times 2(\text{X-NDJ progeny}) / \text{total progeny}$ , where total progeny (Nc) was calculated as  $2(\text{X-NDJ progeny}) + \text{regular progeny}$  (Gyuricza et al. 2016)

<sup>a</sup> many embryonic lethal
