# Supplementary material
Source: publisher figshare collection journal article supplement (https://gsajournals.figshare.com/articles/dataset/_/26424277)
Supplement: Supplementary file 8 [file 1]

**Supplementary Table S5.** X-NDJ in *nos>wcd-RFP* females

A. Sex chromosome NDJ :

| Progeny:               | Regular |     | Exceptional |    |     |       |
|------------------------|---------|-----|-------------|----|-----|-------|
| Maternal genotype      | XX      | XY  | XXY         | X0 | Nc  | % NDJ |
| <i>WT</i>              | 252     | 186 | 1           | 0  | 440 | 0.5   |
| <i>nos&gt;wcdRFP/+</i> | 212     | 204 | 0           | 1  | 418 | 0.5   |
| <i>nos&gt;UAS-GFP</i>  | 234     | 237 | 0           | 0  | 471 | 0     |

Indicated females were crossed to *w/BsYy+* males. Surviving exceptional aneuploids are Bar-eyed *y/y/B<sup>s</sup>Y* females and wild-type *yw/0* males

Percentage of X-NDJ:  $100 \times 2(X\text{-NDJ progeny}) / \text{total progeny}$ , where total progeny (Nc) was calculated as  $2(X\text{-NDJ progeny}) + \text{regular progeny}$  (Gyuricza et al 2016).
