# Supplementary material
Source: publisher figshare collection journal article supplement (https://gsajournals.figshare.com/articles/dataset/_/26424277)

FIGURE S3

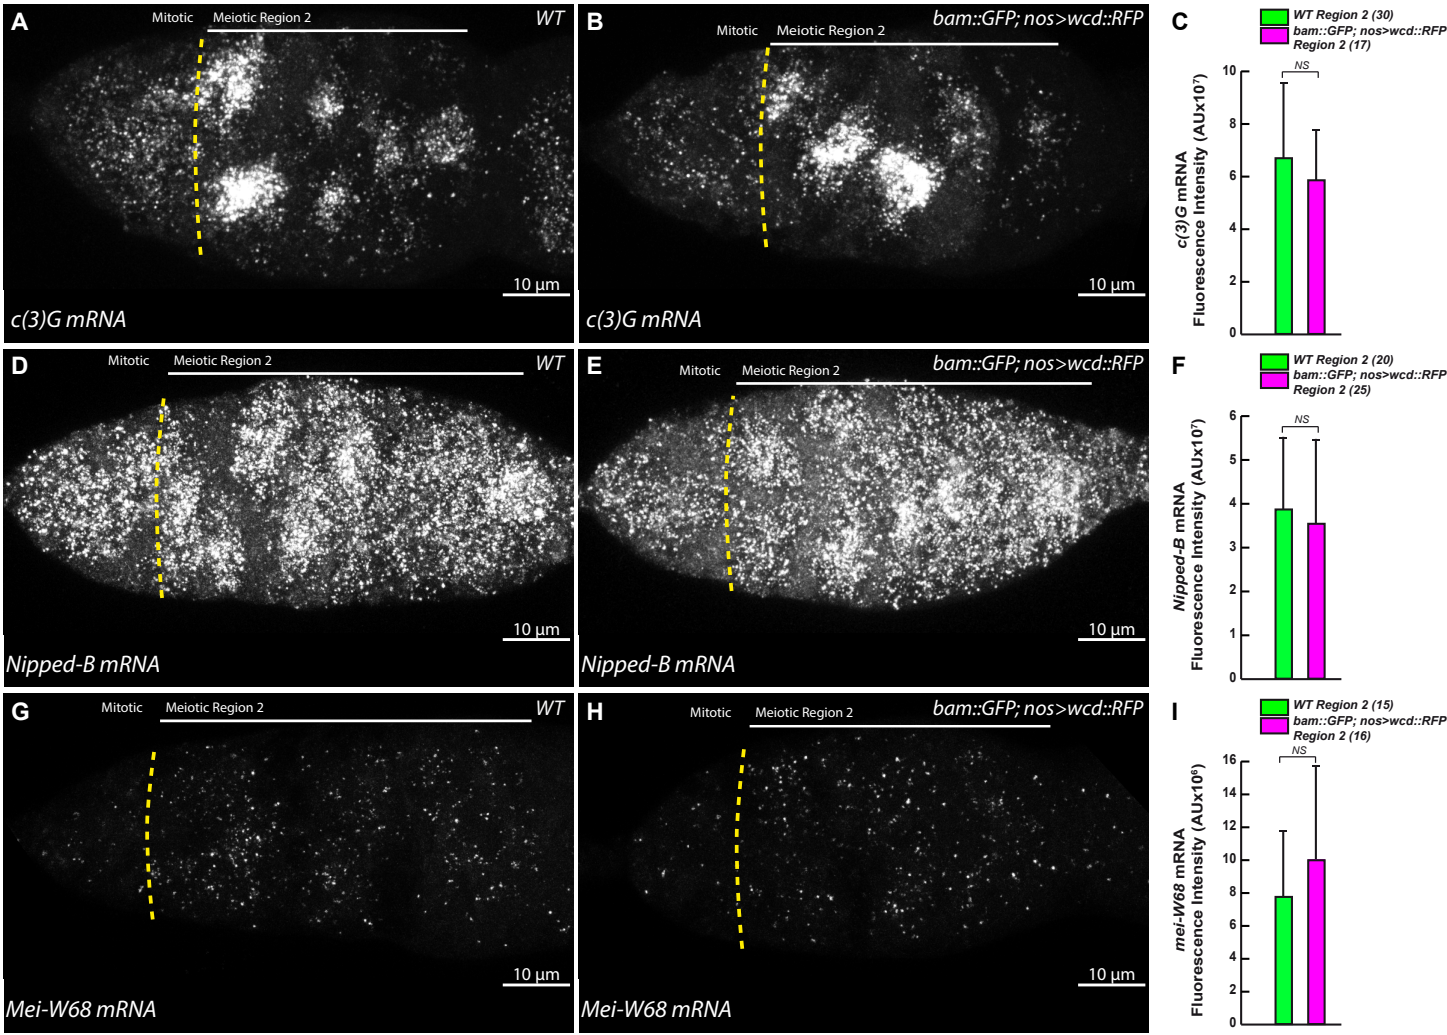

Supplement: Supplementary file 1 [file 1]

Figure S4

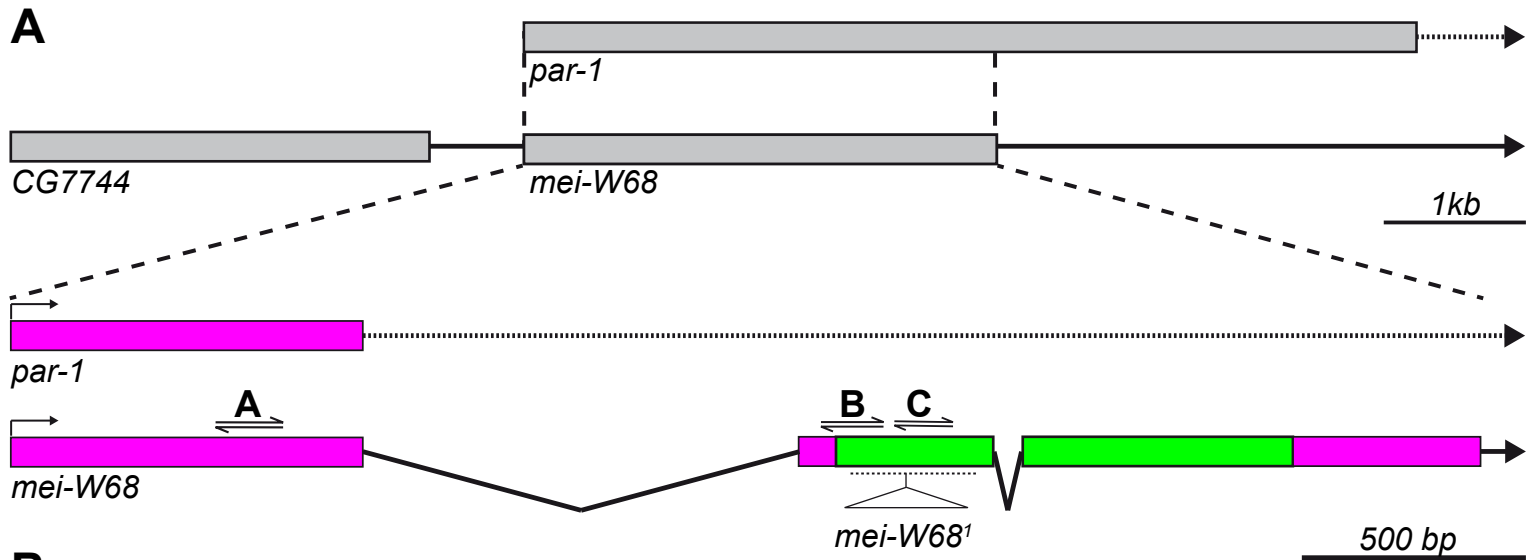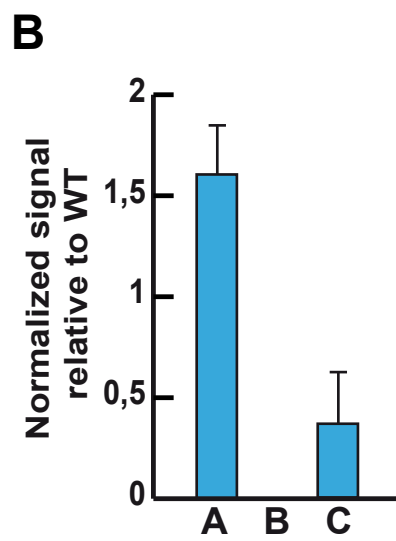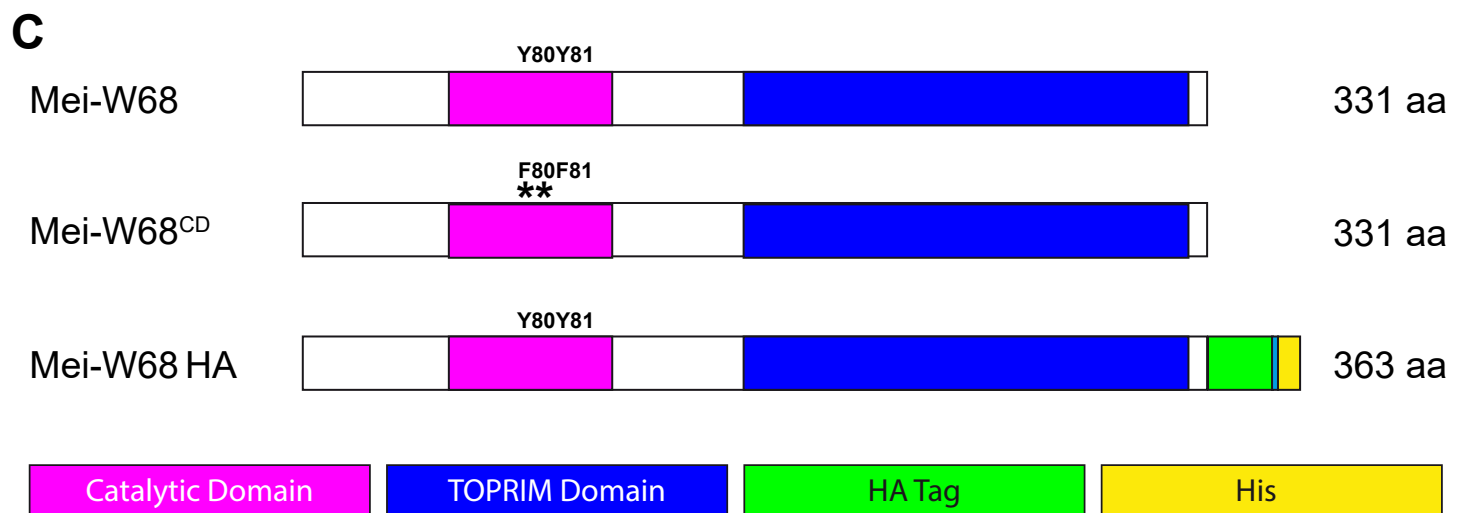

Supplement: Supplementary file 2 [file 1]

FIGURE S5

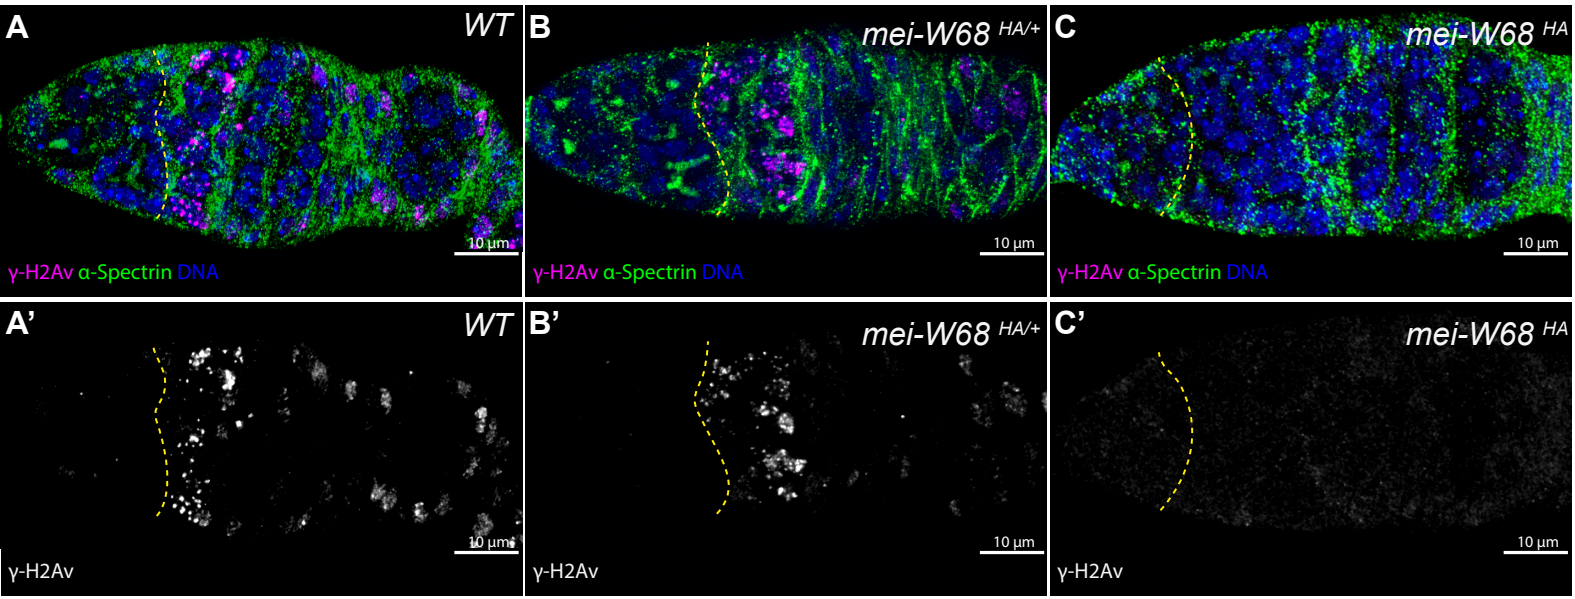

Supplement: Supplementary file 4 [file 1]

FIGURE S2

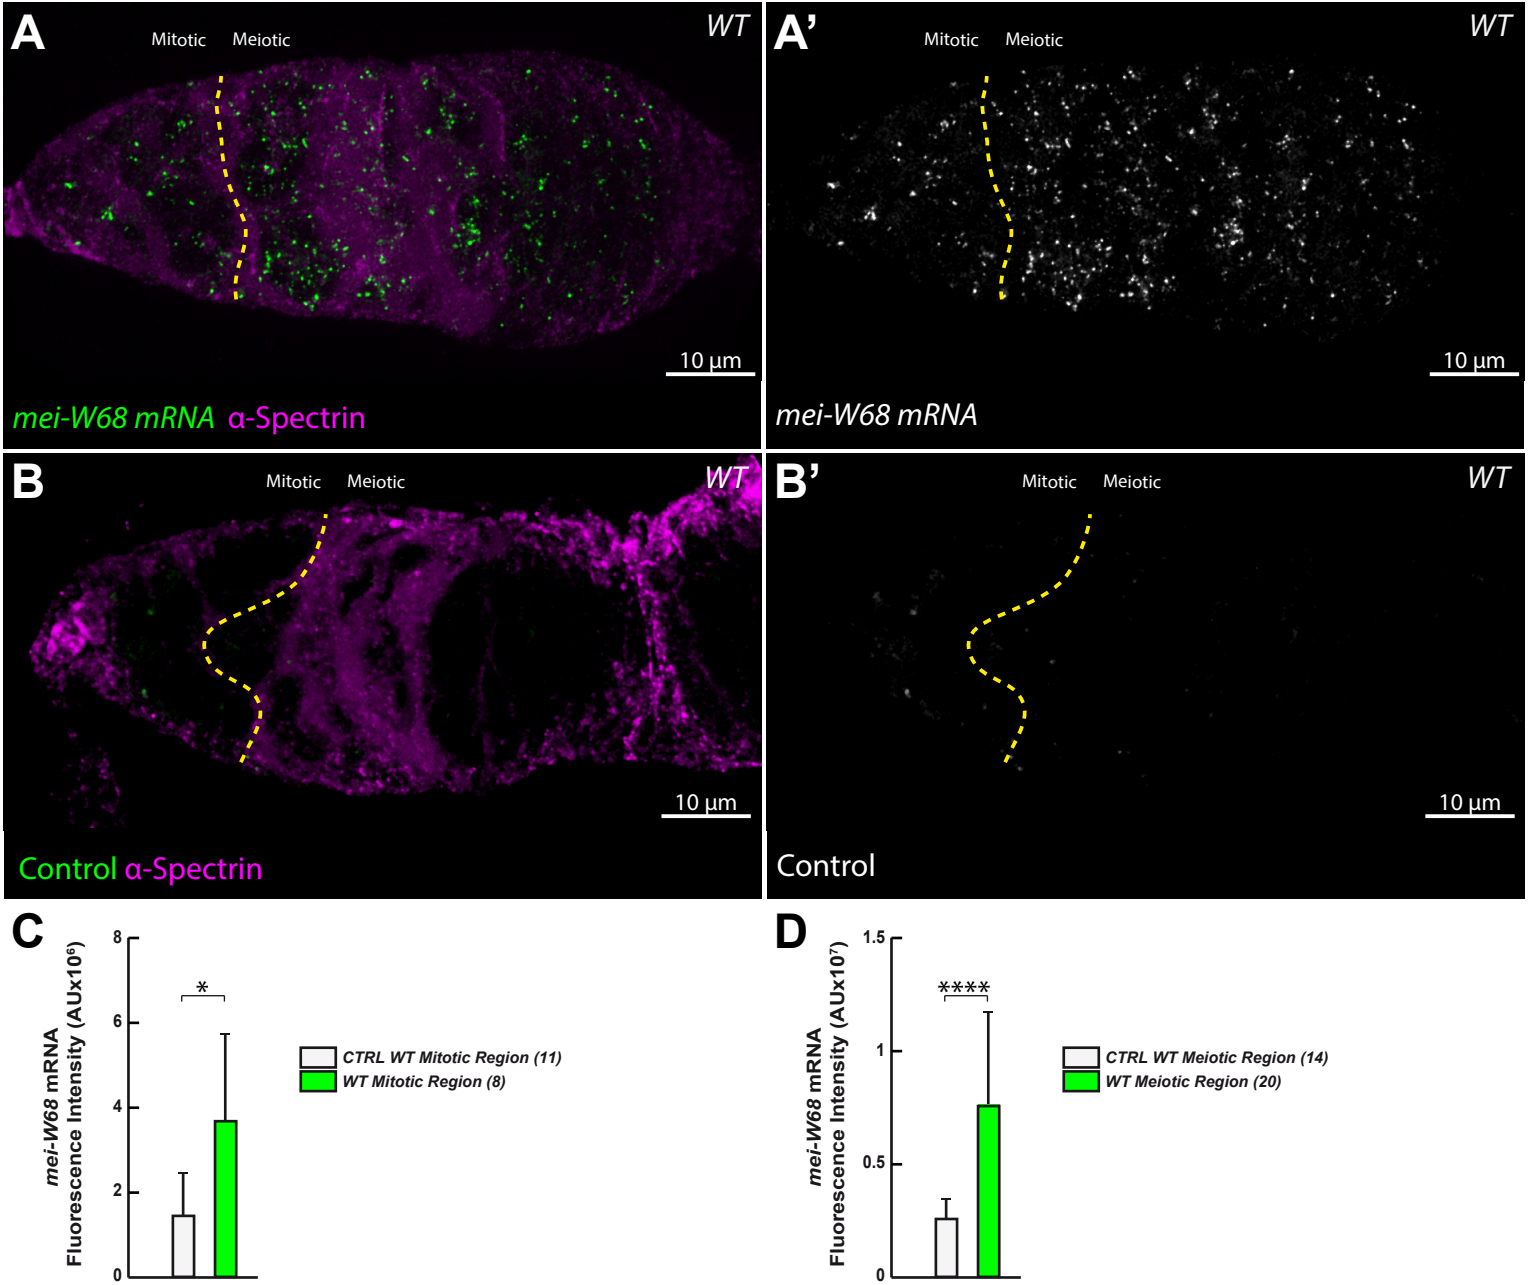

Supplement: Supplementary file 6 [file 1]

Figure S1

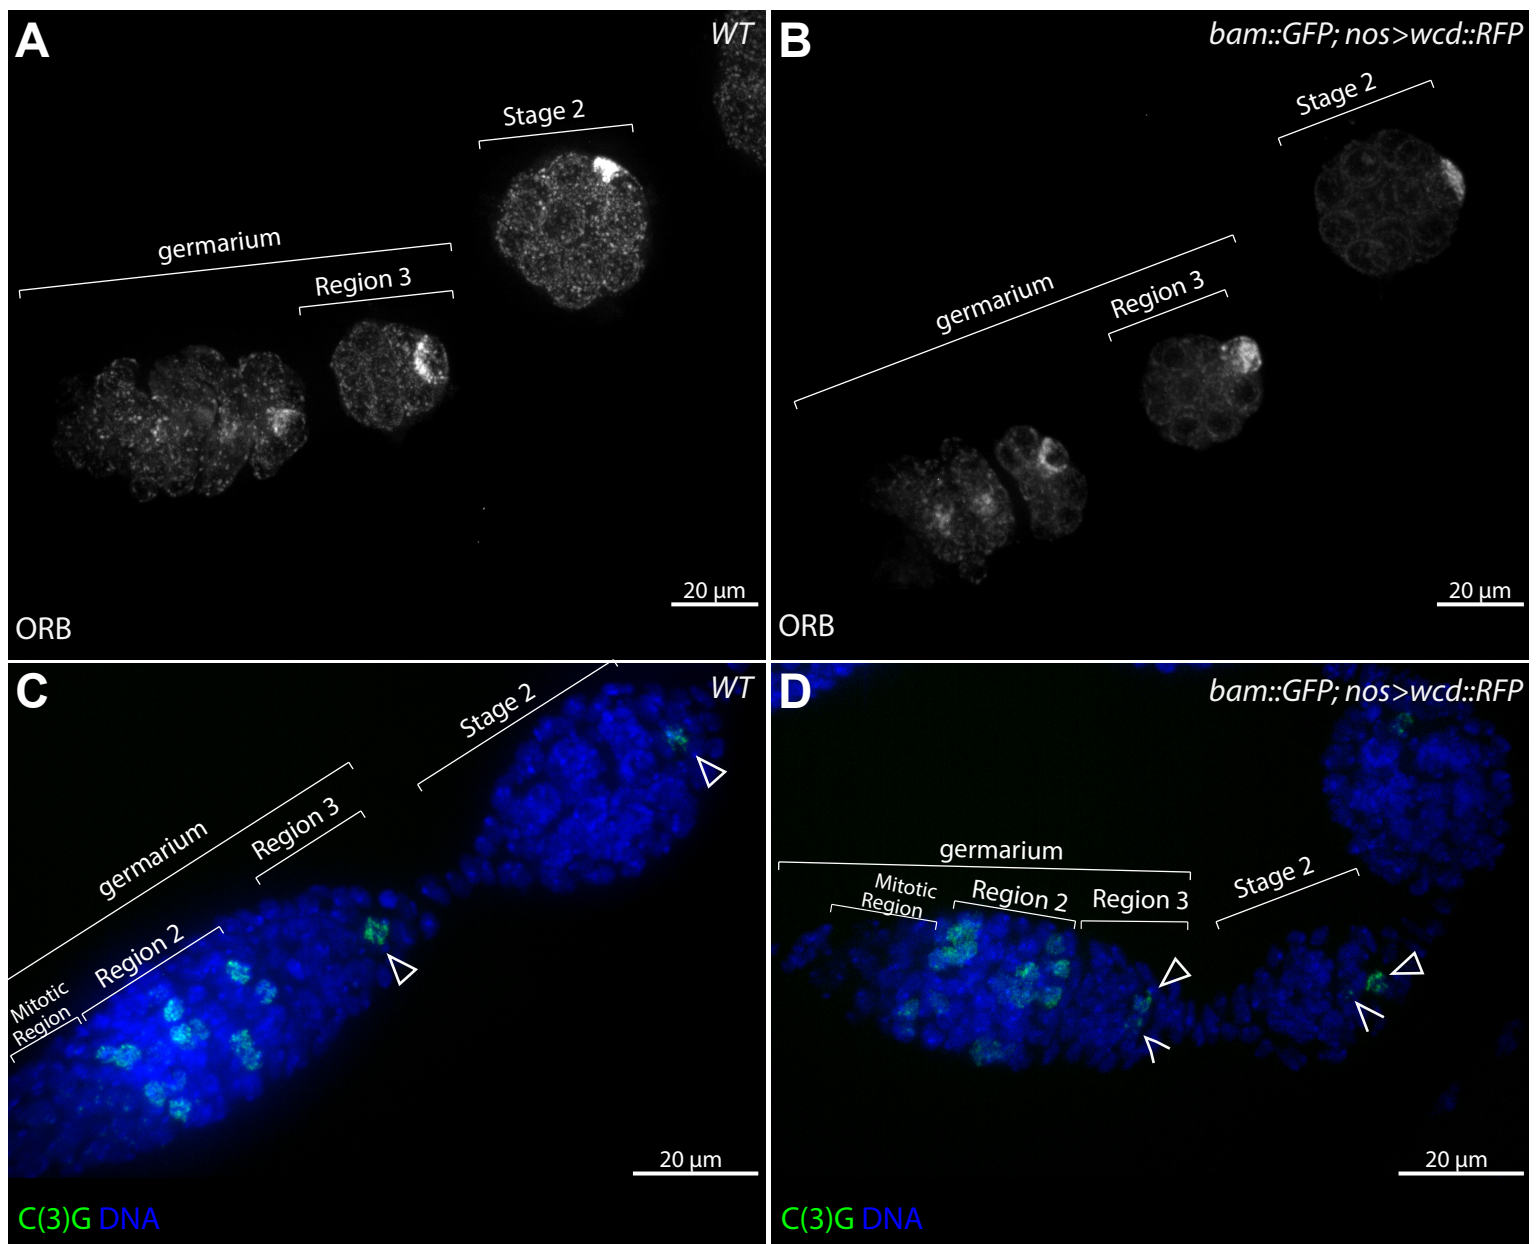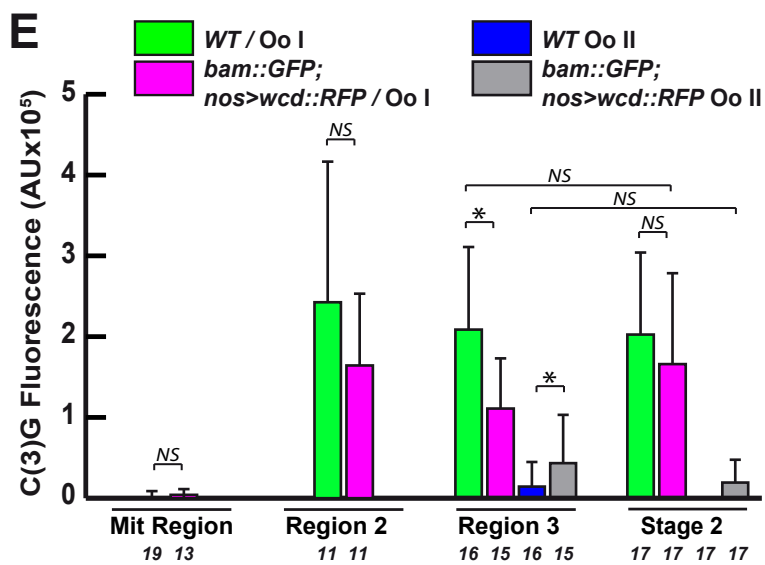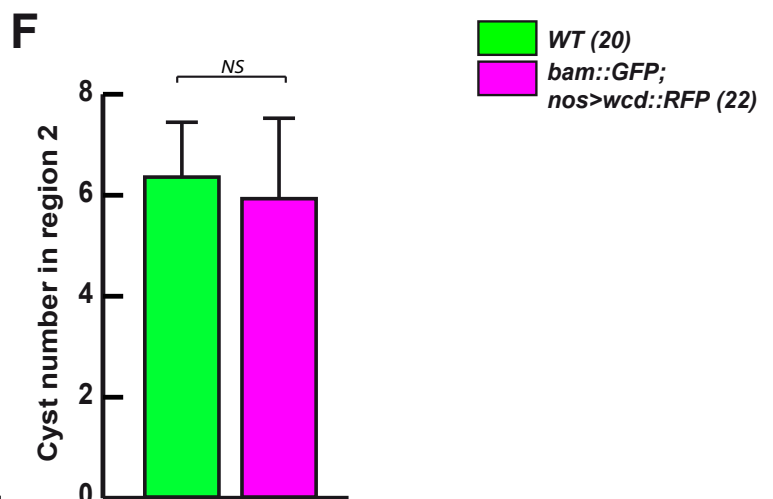

Supplement: Supplementary file 7 [file 1]

FIGURE S7

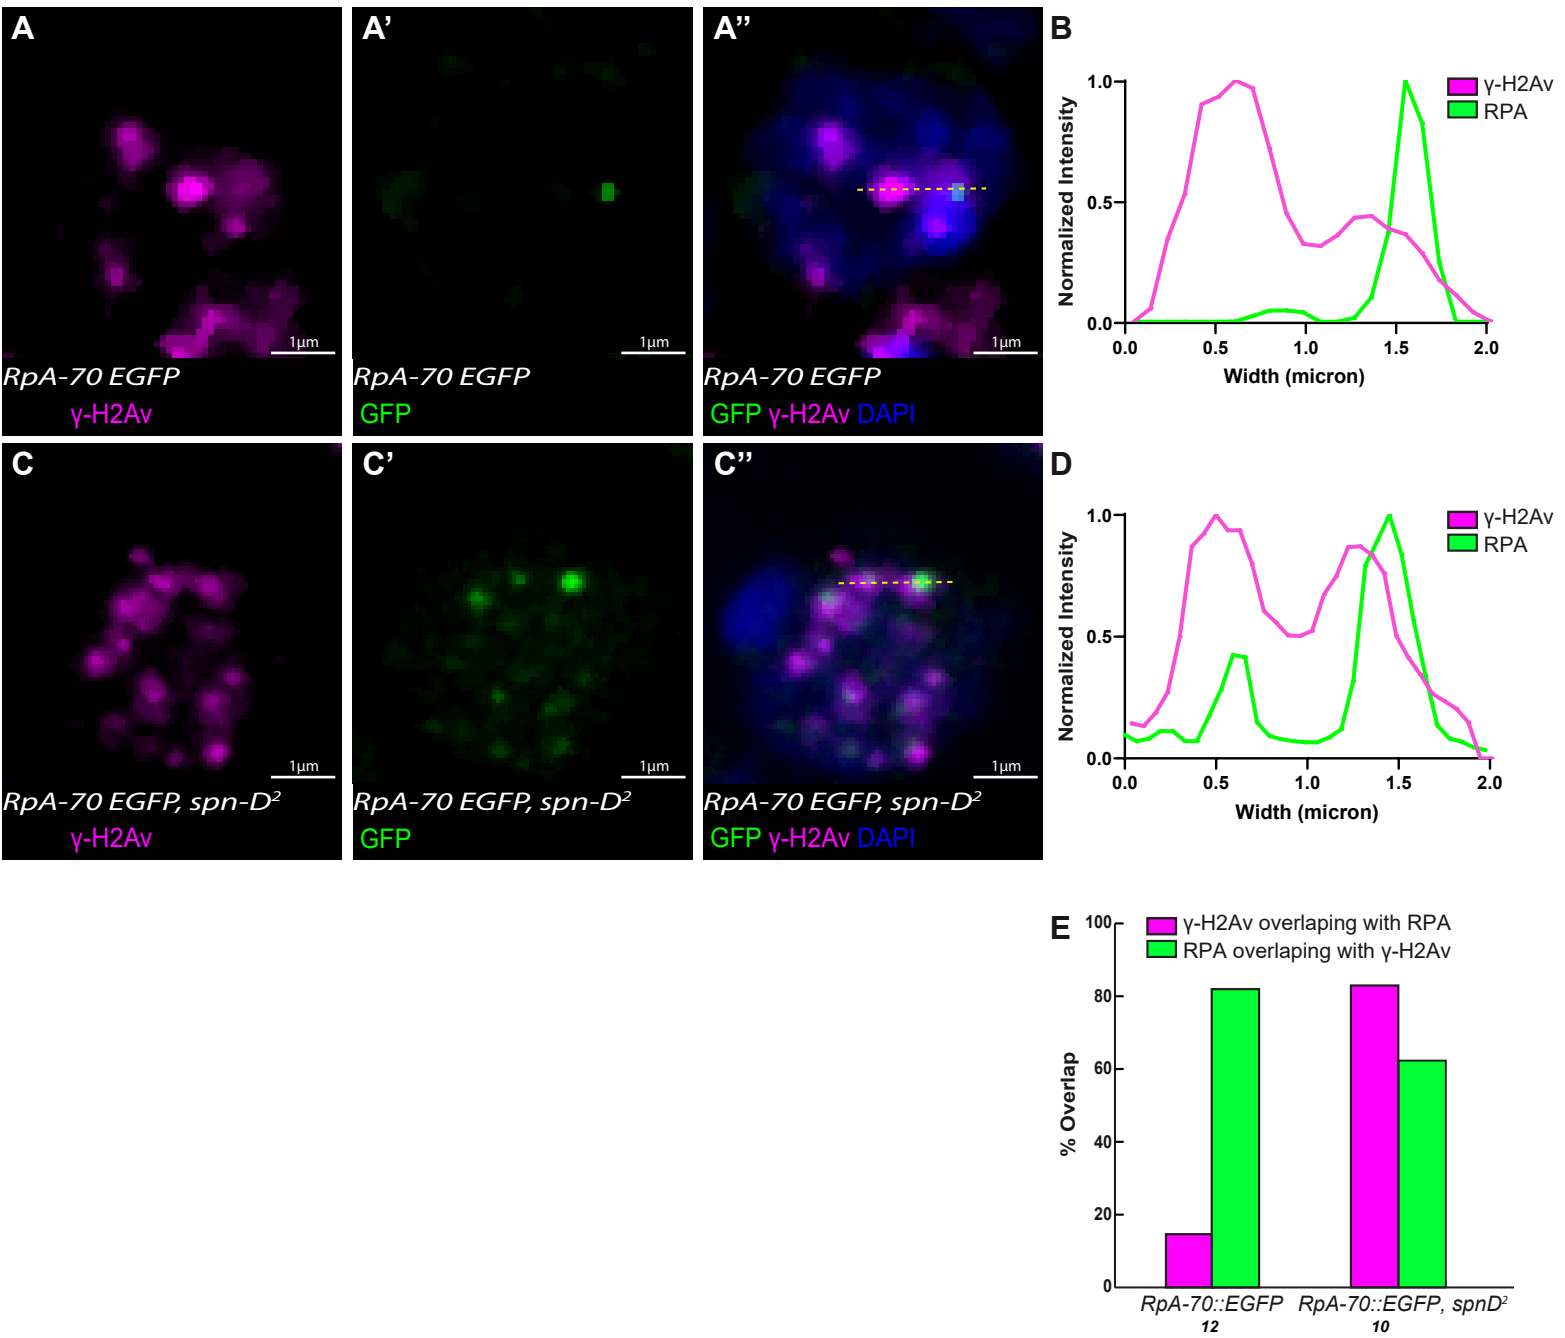

Supplement: Supplementary file 9 [file 1]

Figure S6

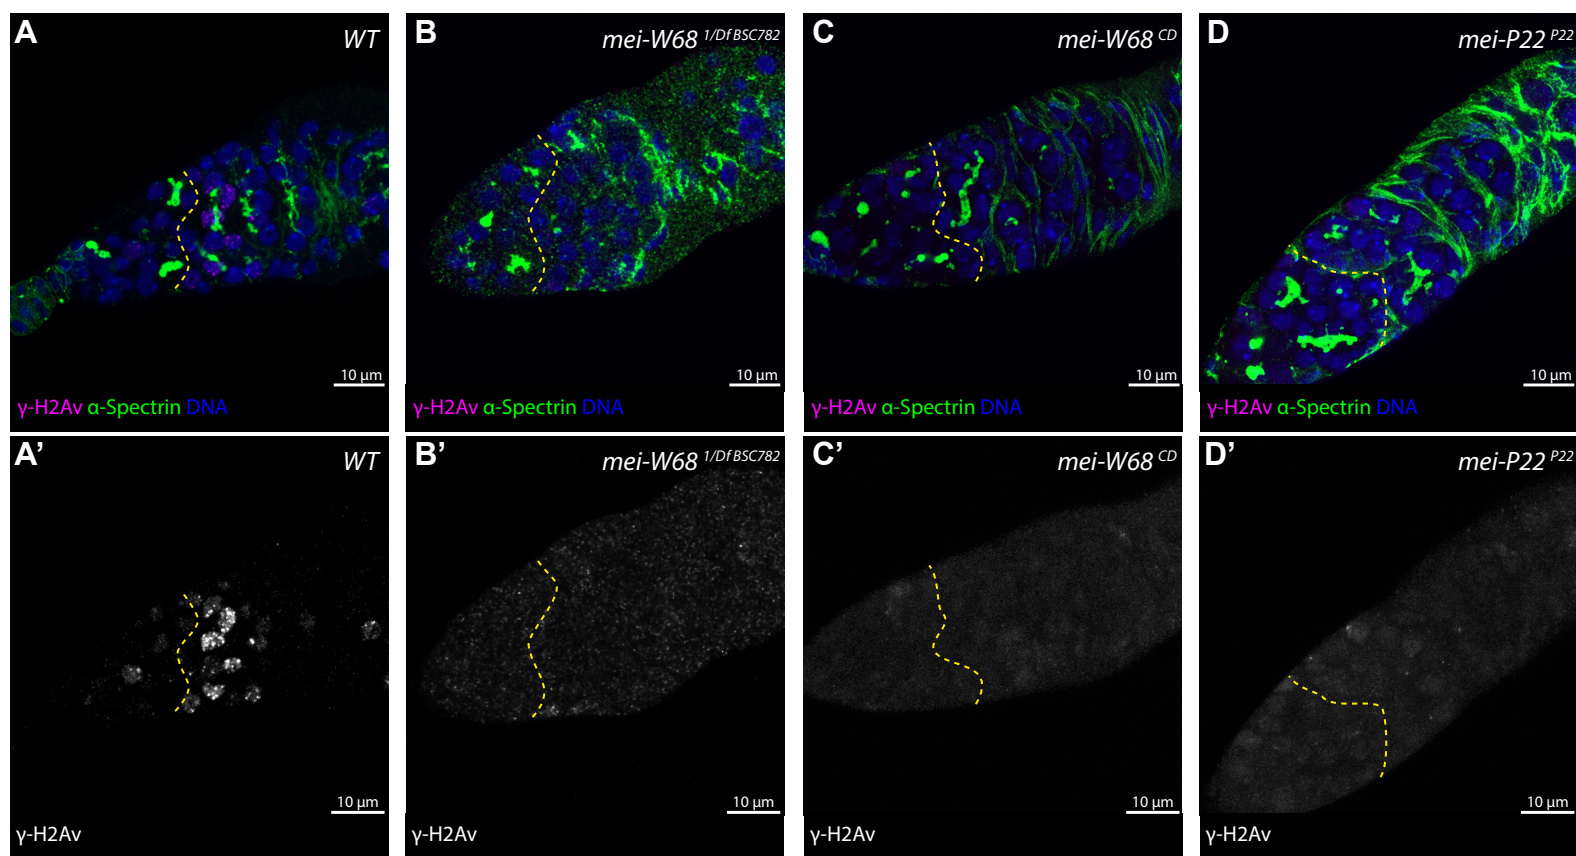

Supplement: Supplementary file 10 [file 1]
